# Supplementary material
Source: PubMed Central journal article supplement (PMC5557050)

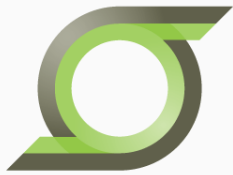

The Elizabeth H.  
and James S. McDonnell III

**McDONNELL  
GENOME INSTITUTE**

at Washington University

## Sanger traces for *Prlr* validation of WGS findings

# B3R15 L. tho.

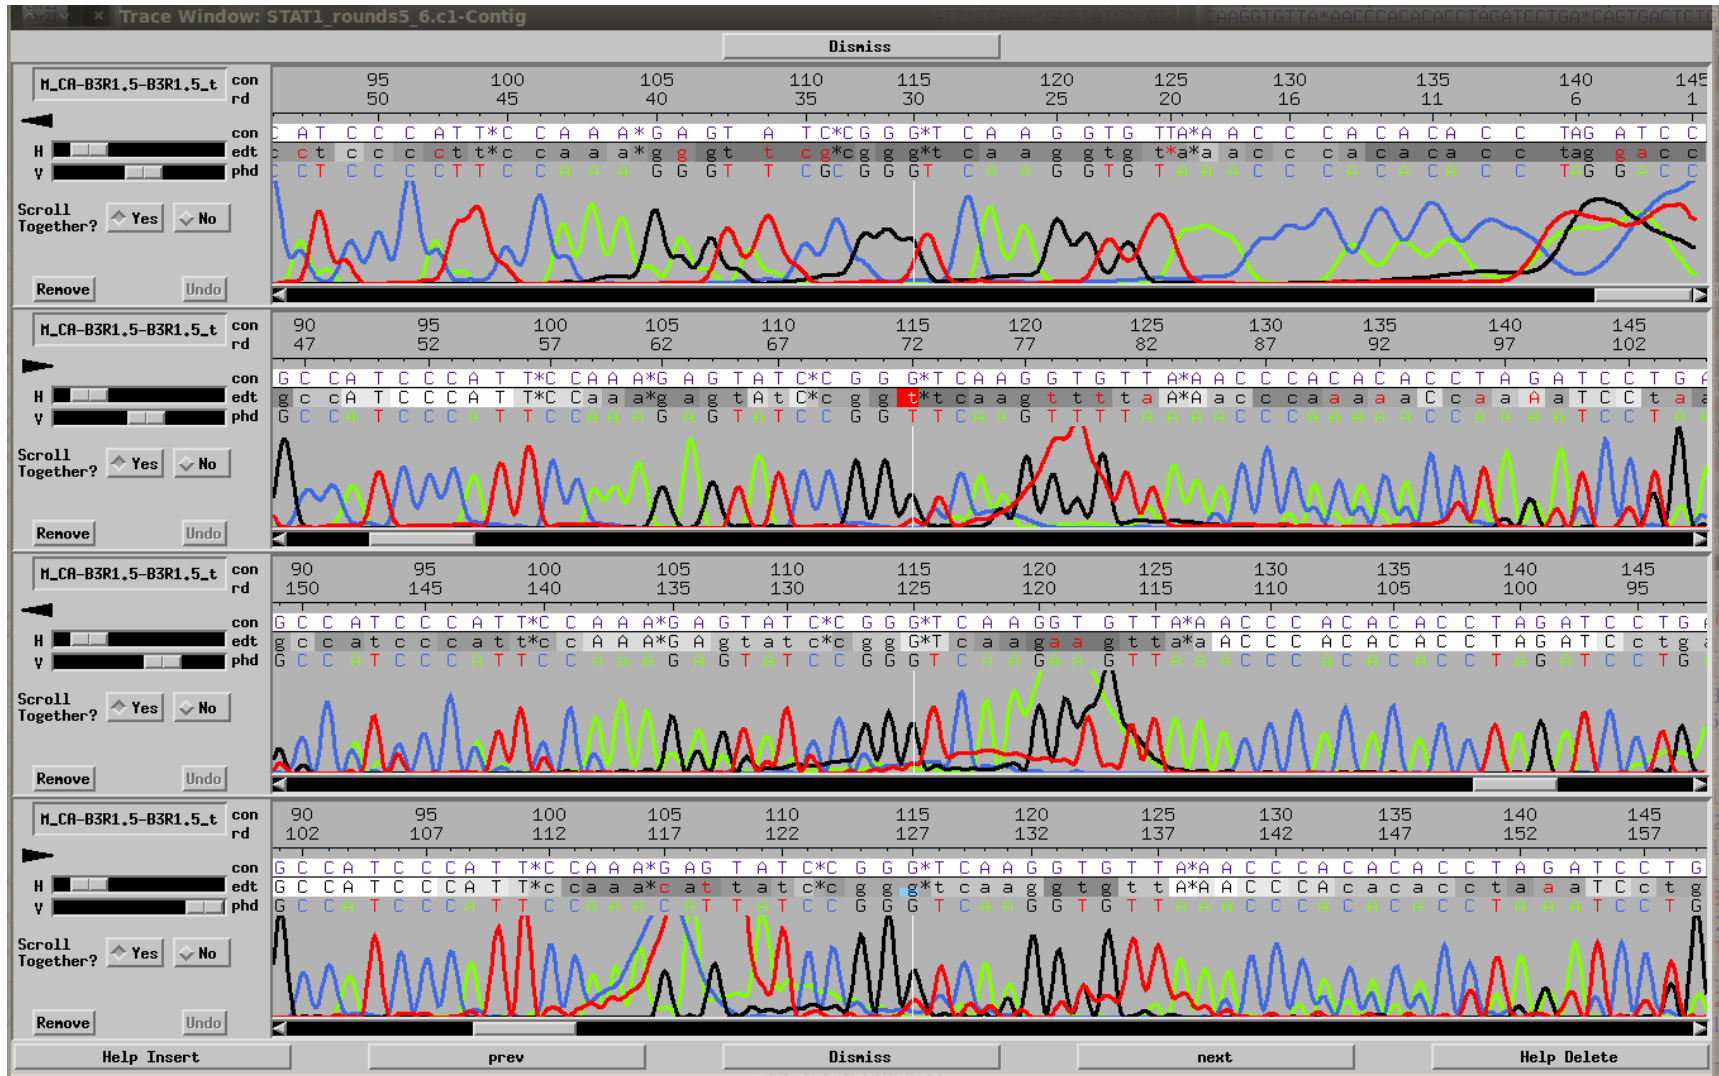

# B3R1R2L1 R. tho.

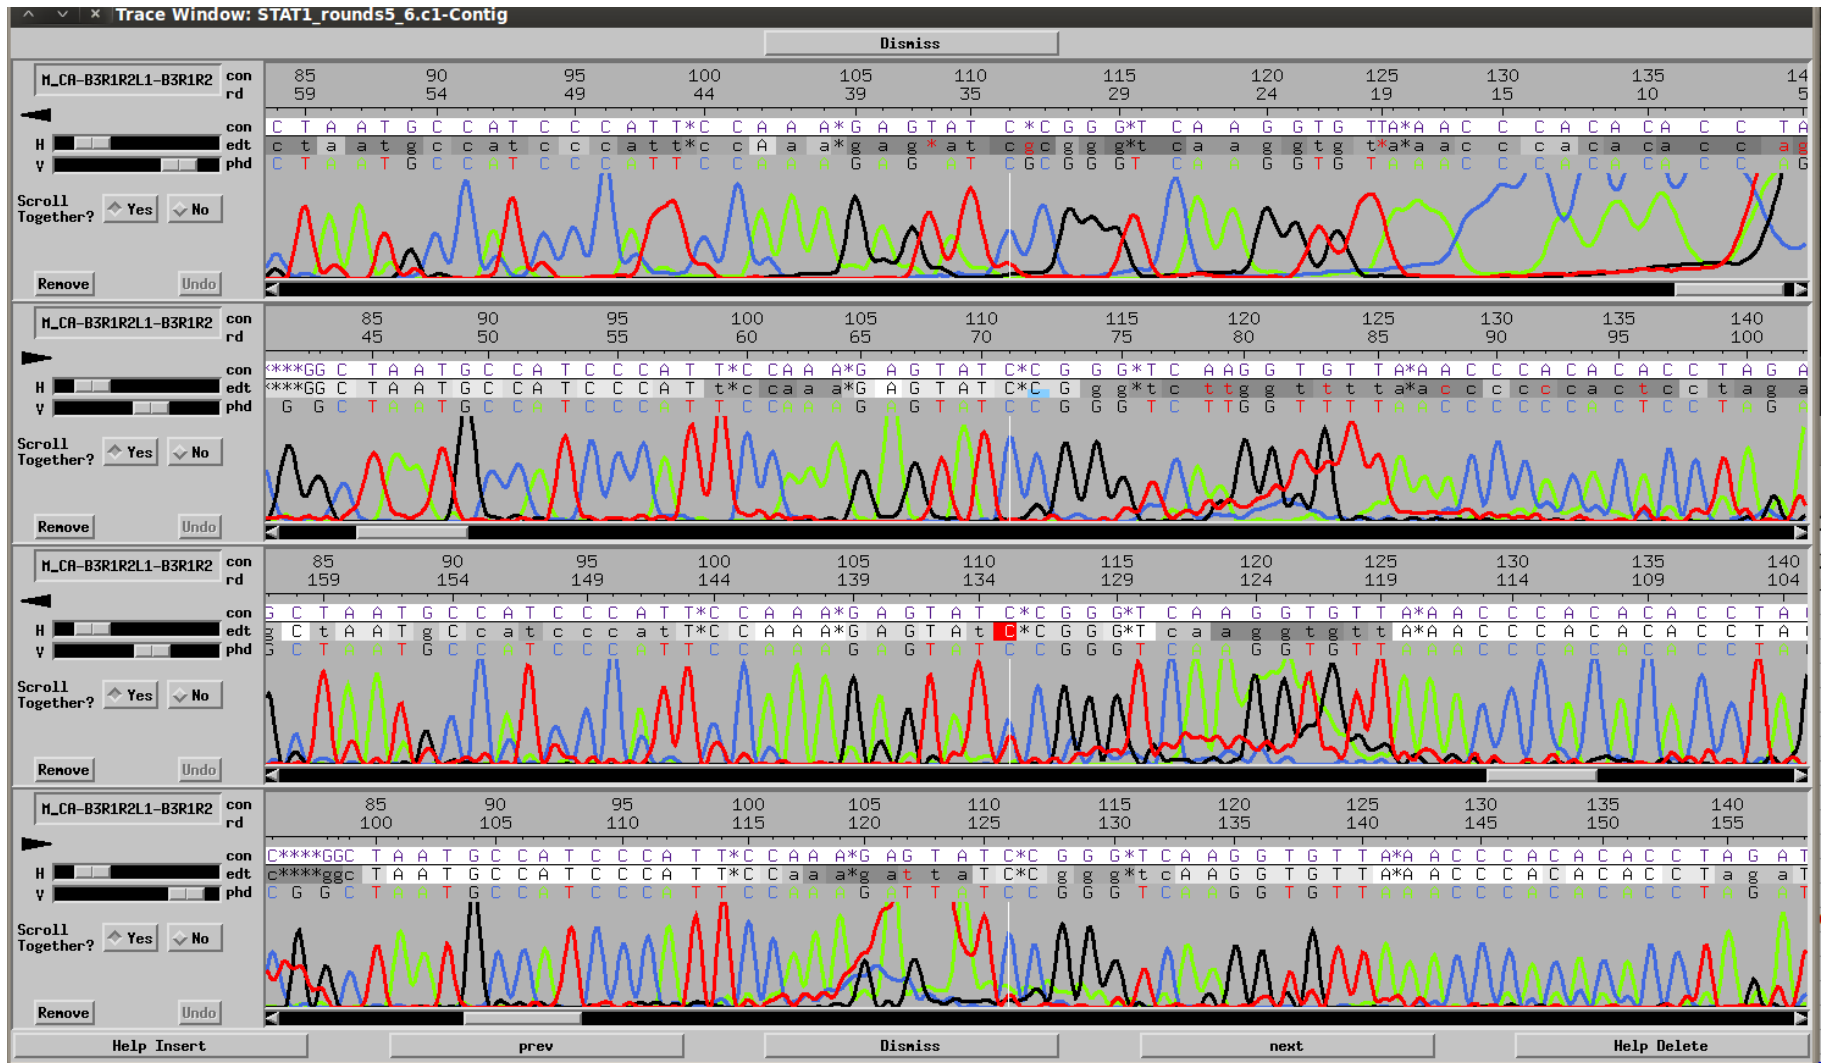

# OVX3L2 R. tho.

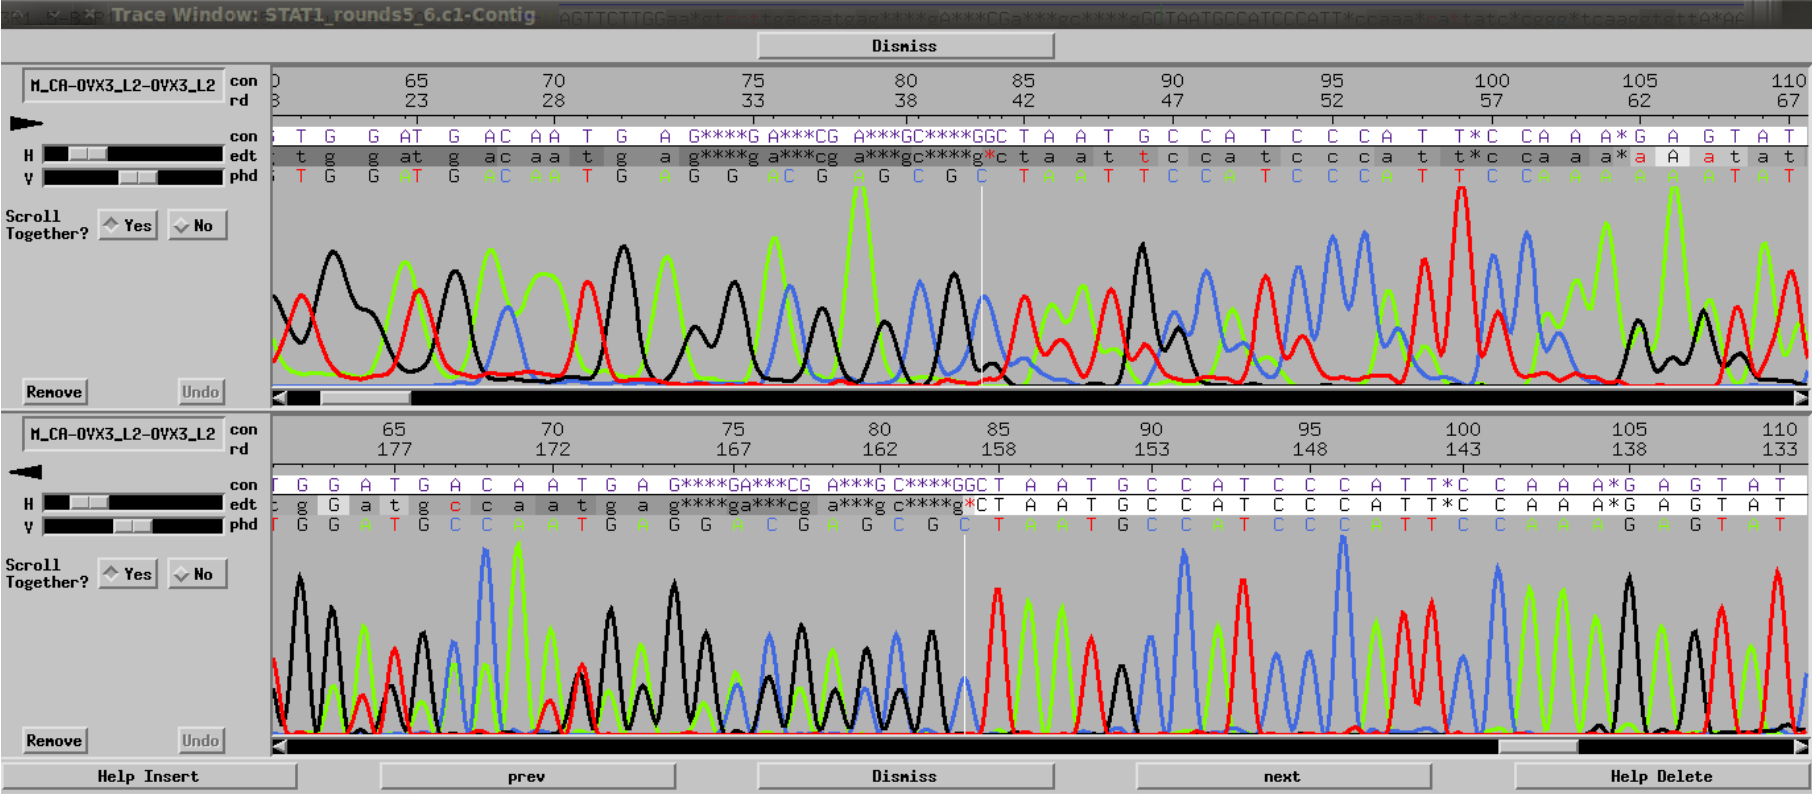

# OVX6R2 L. cerv.

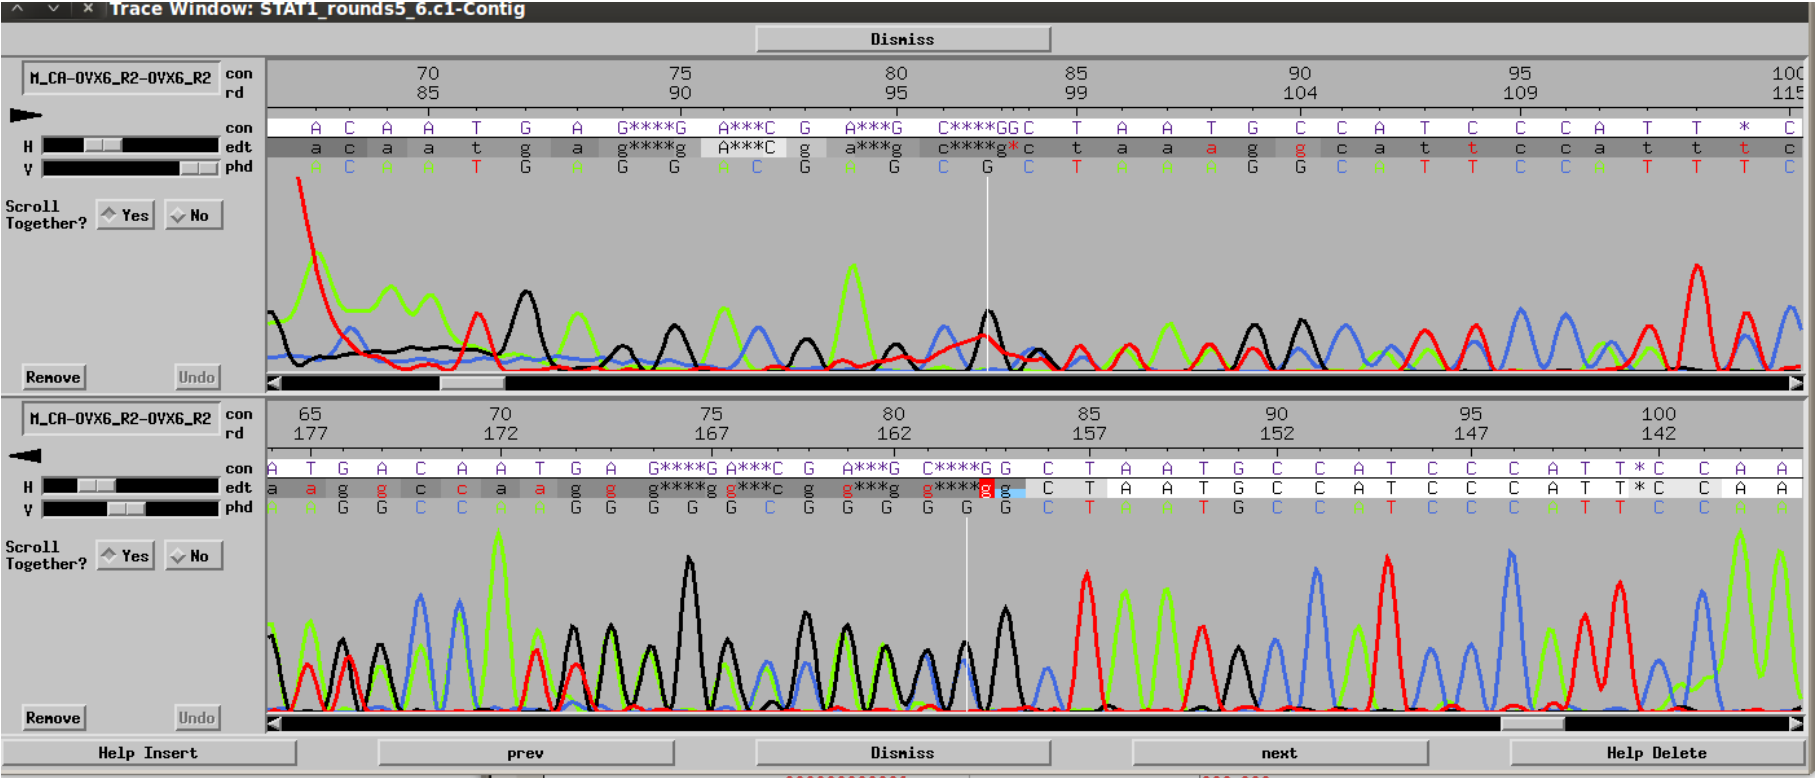

# SSM1

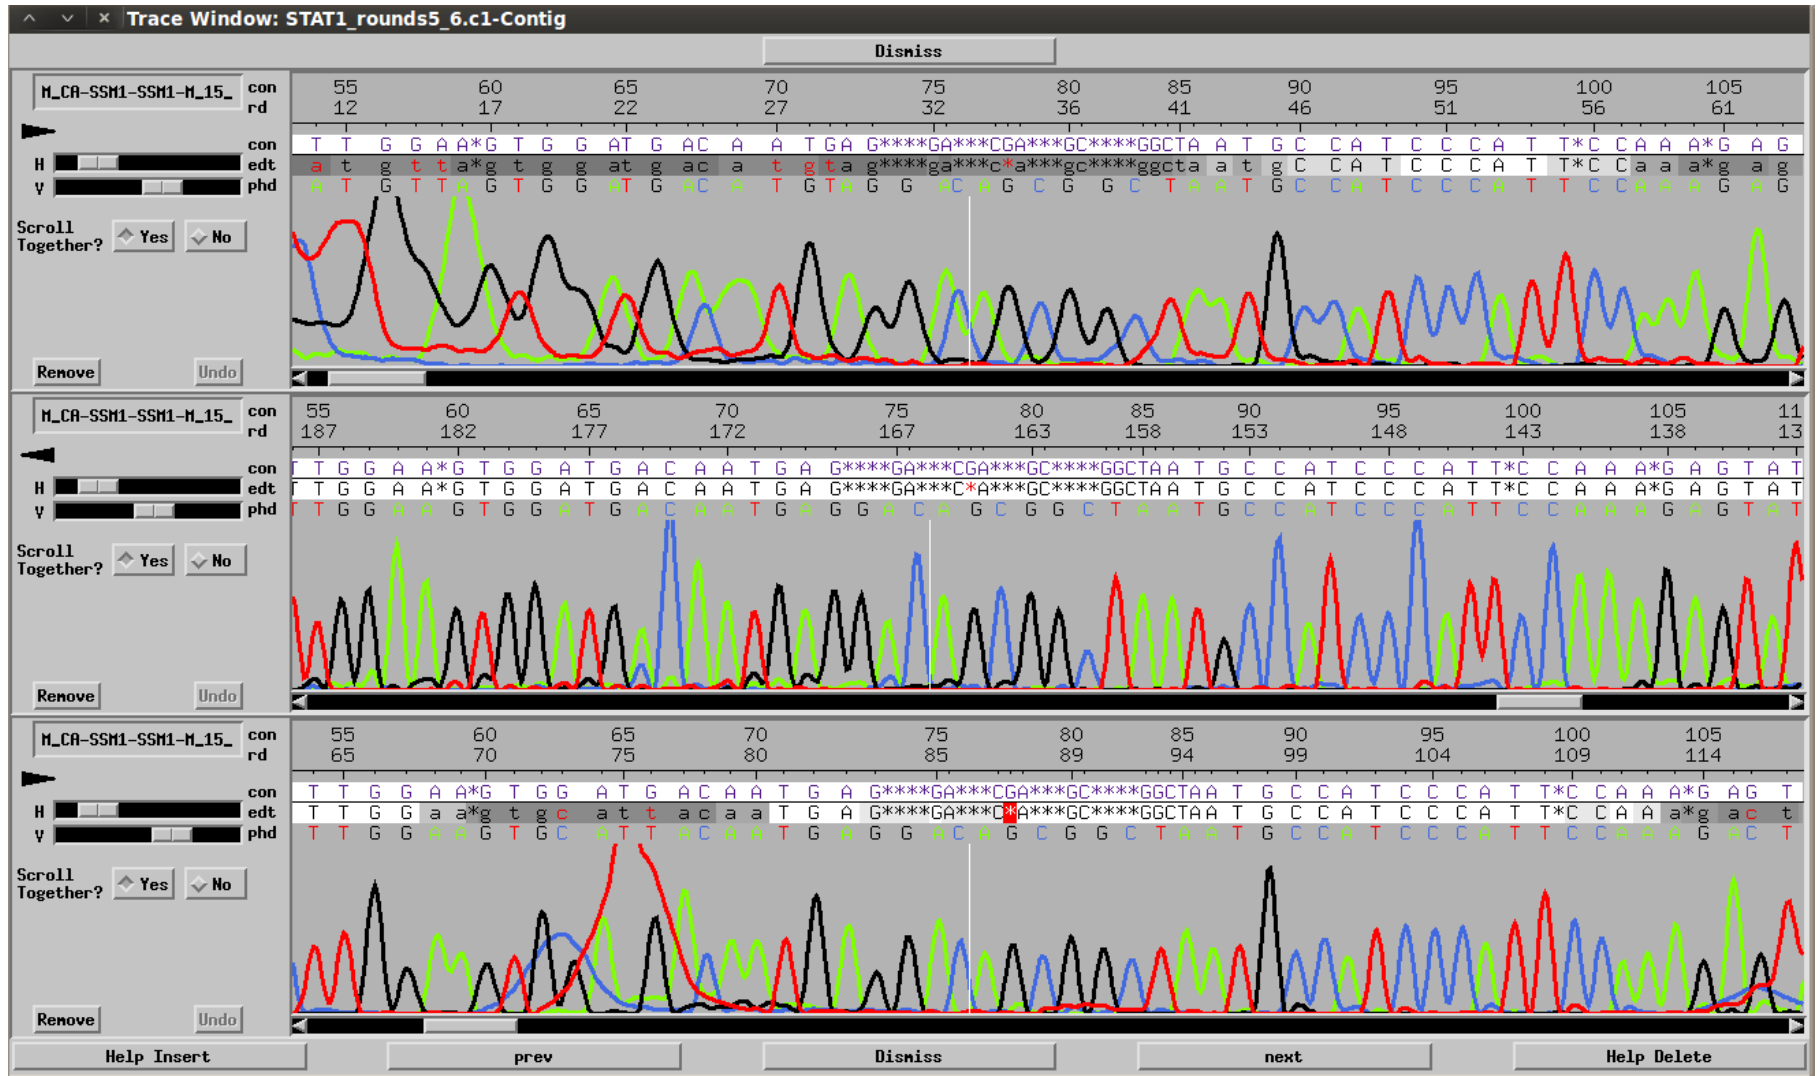

# SSM2

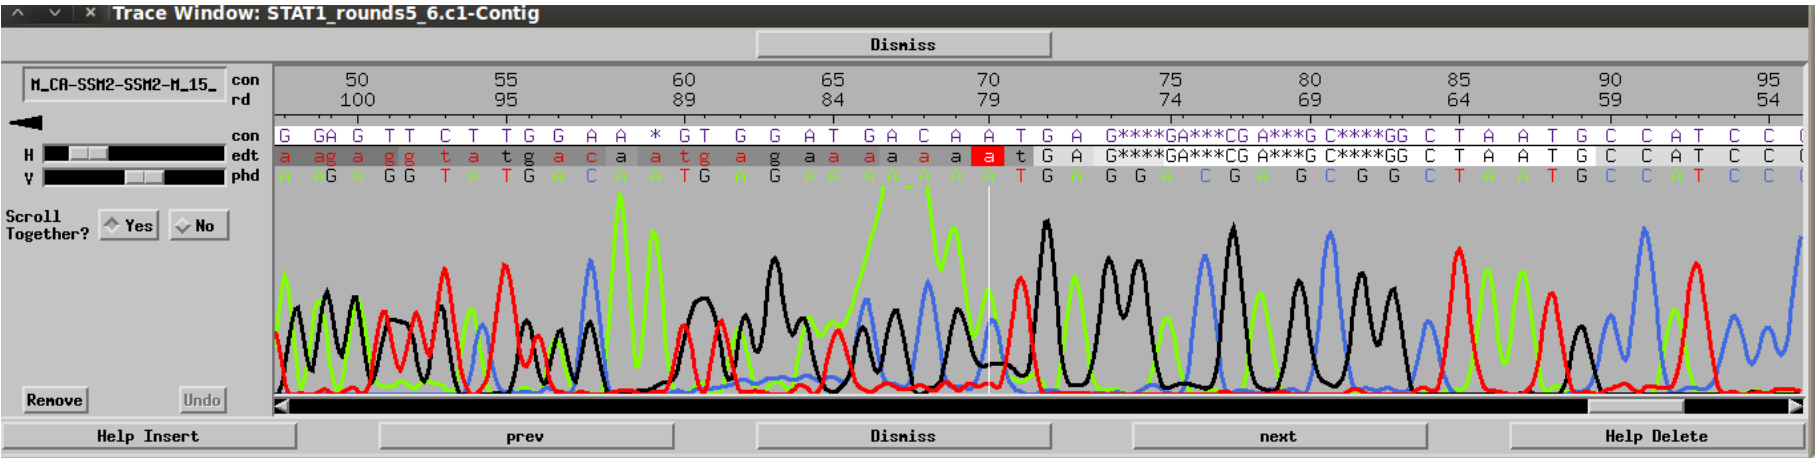

# SSM3

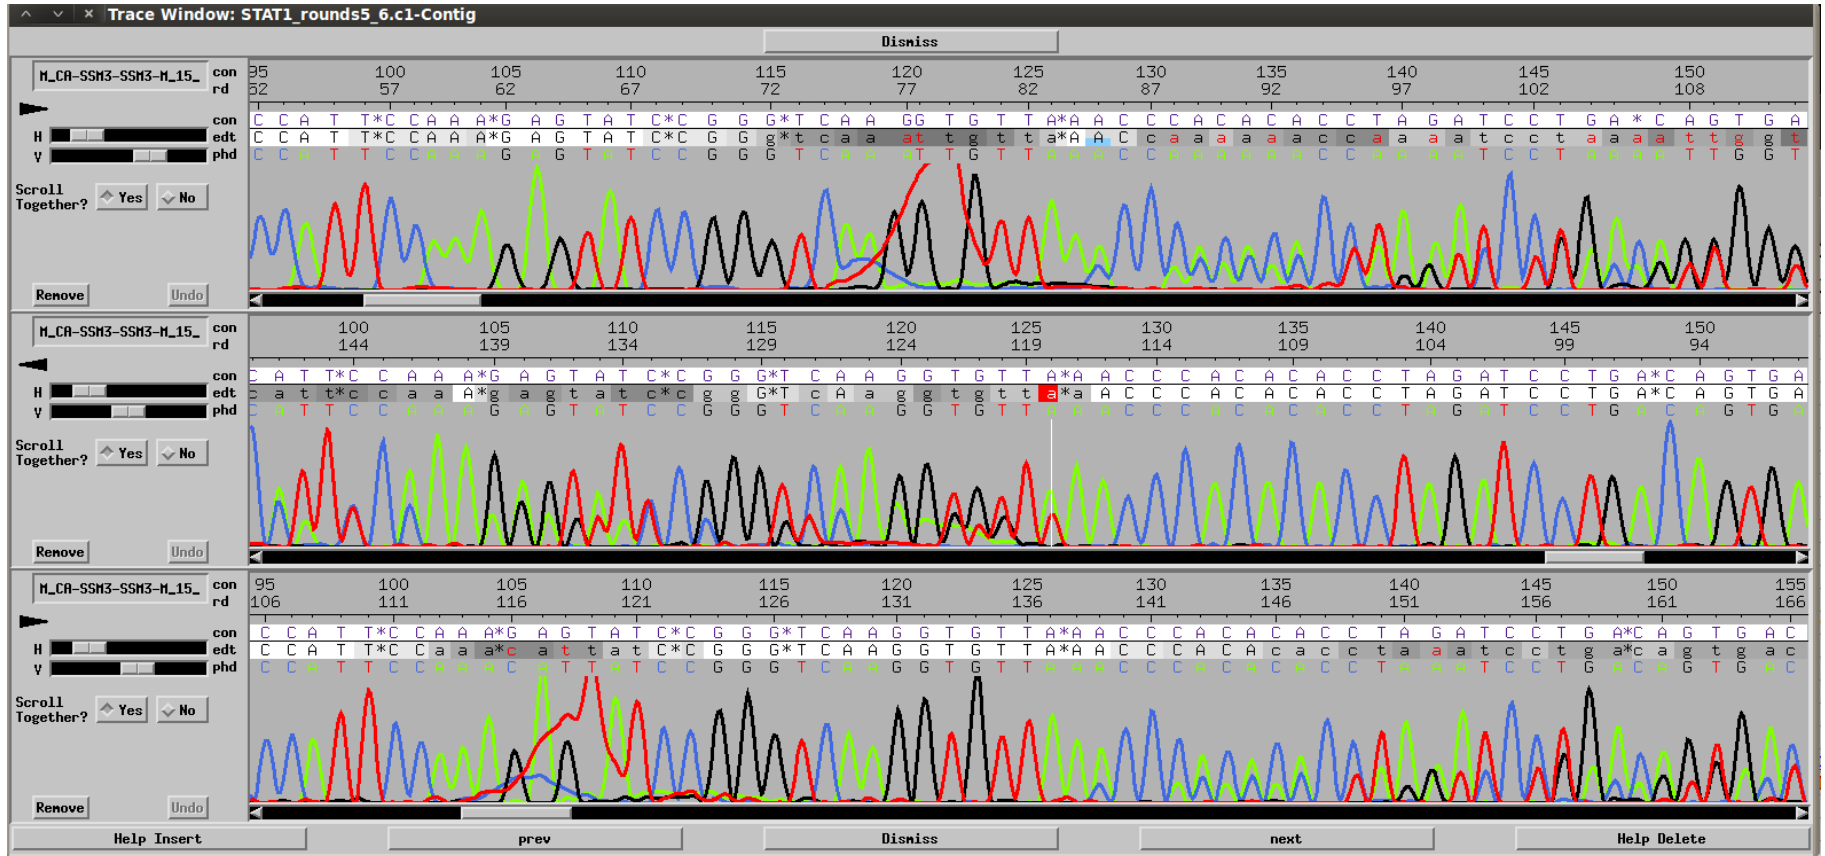



# TAC171 R. tho.

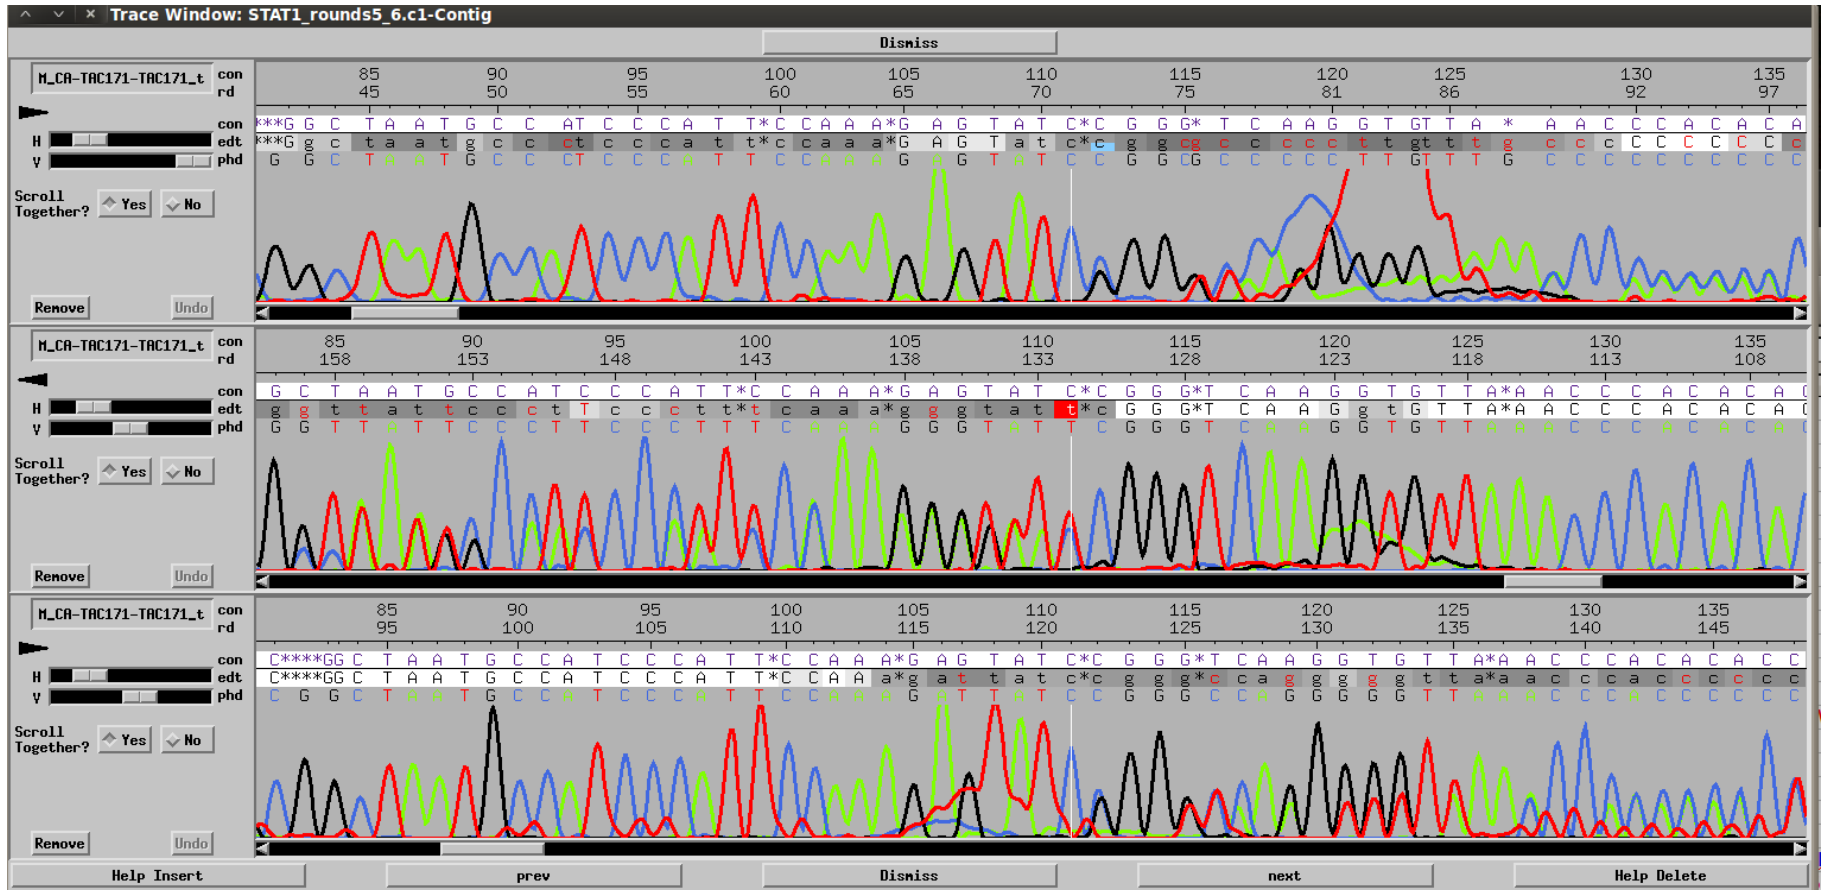

# TAC183 R. tho.

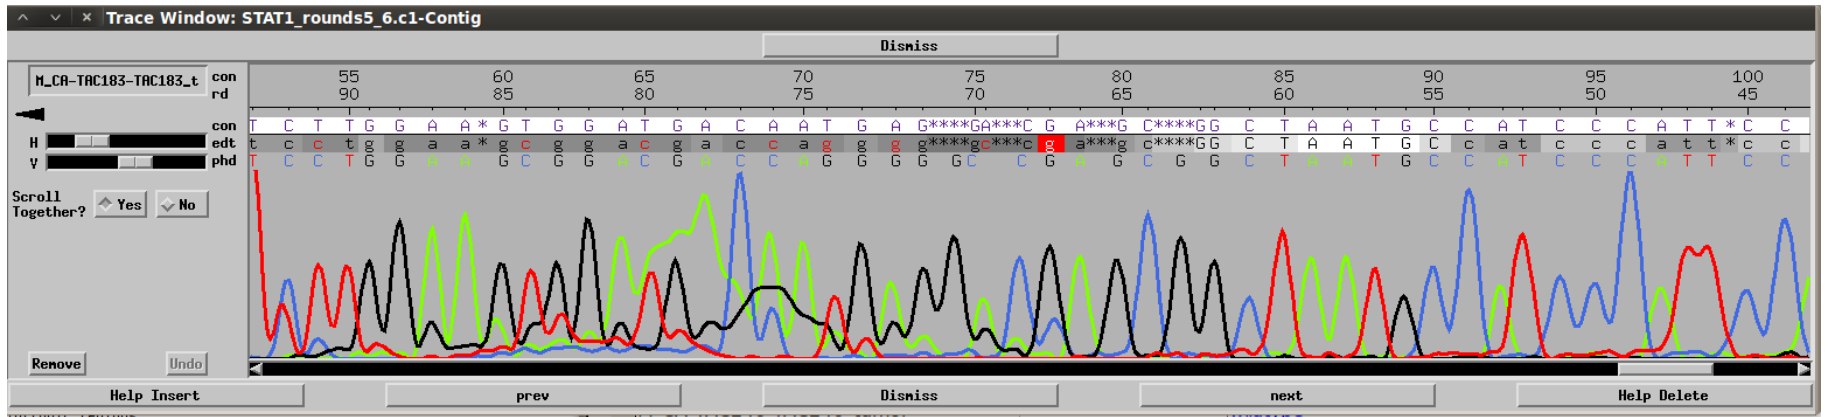

# TAC186 L. cerv.

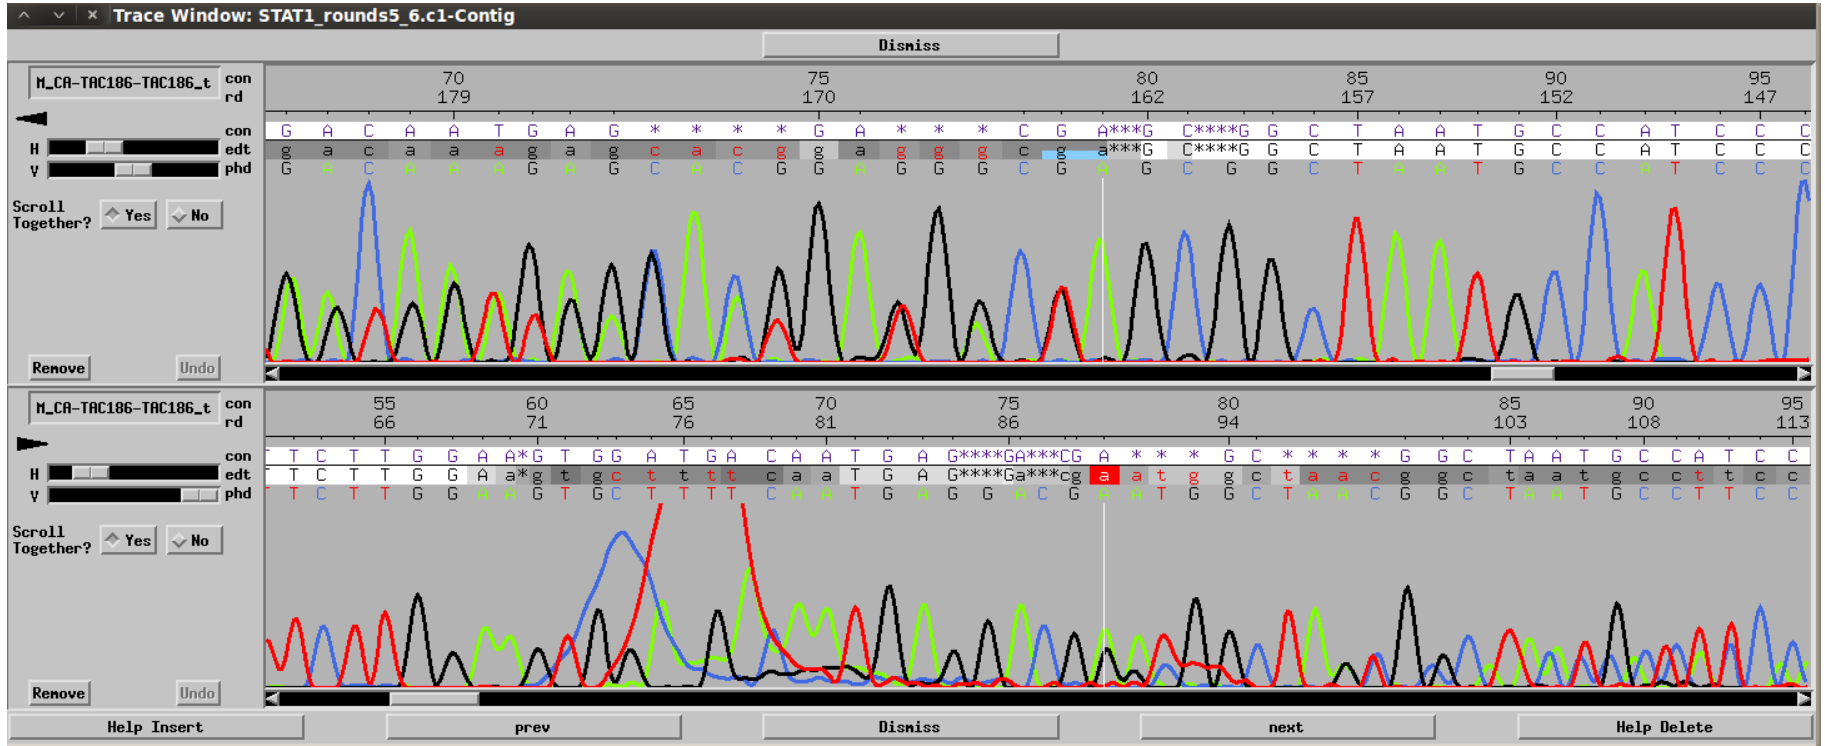

# TAC246 R. ing.

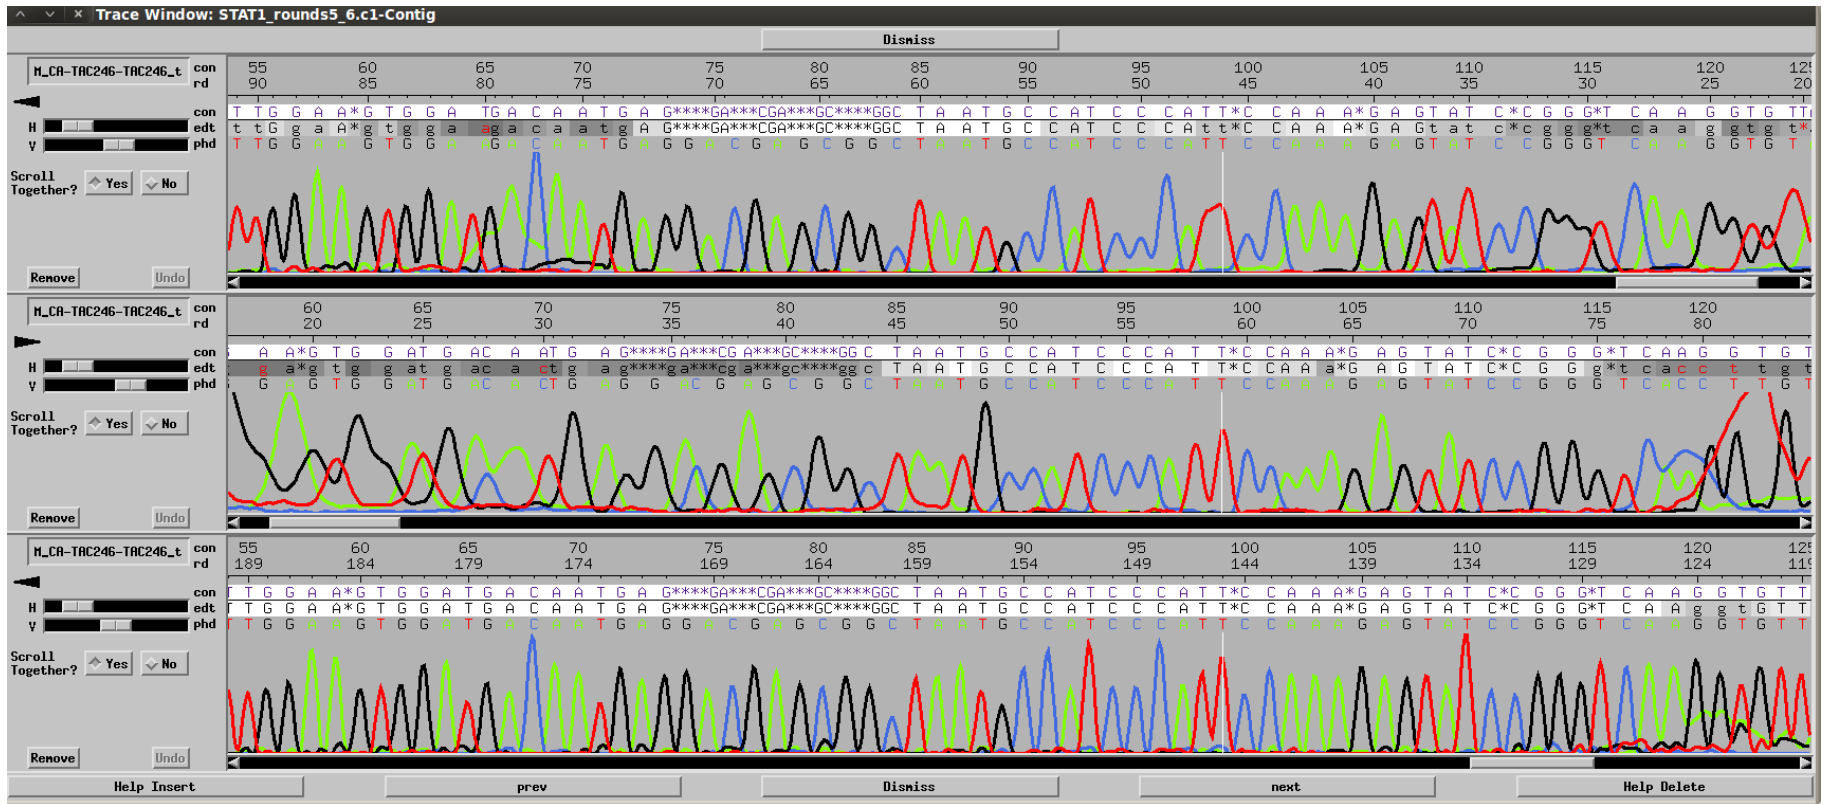

# TAC247 L. cerv.

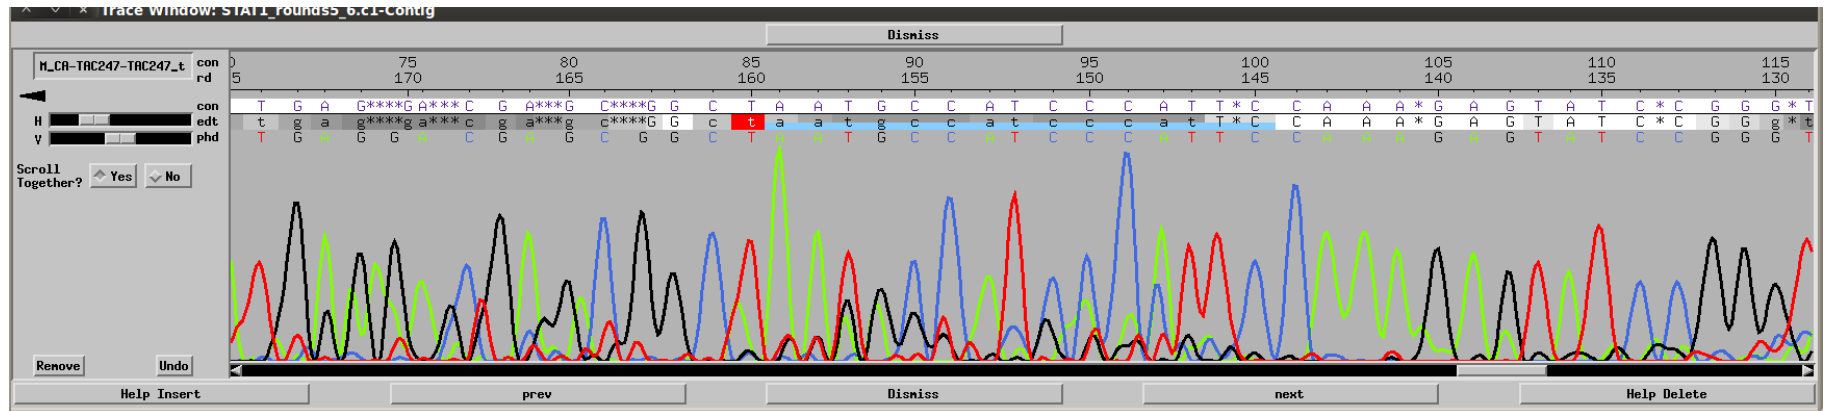

# TAC266 L. tho.

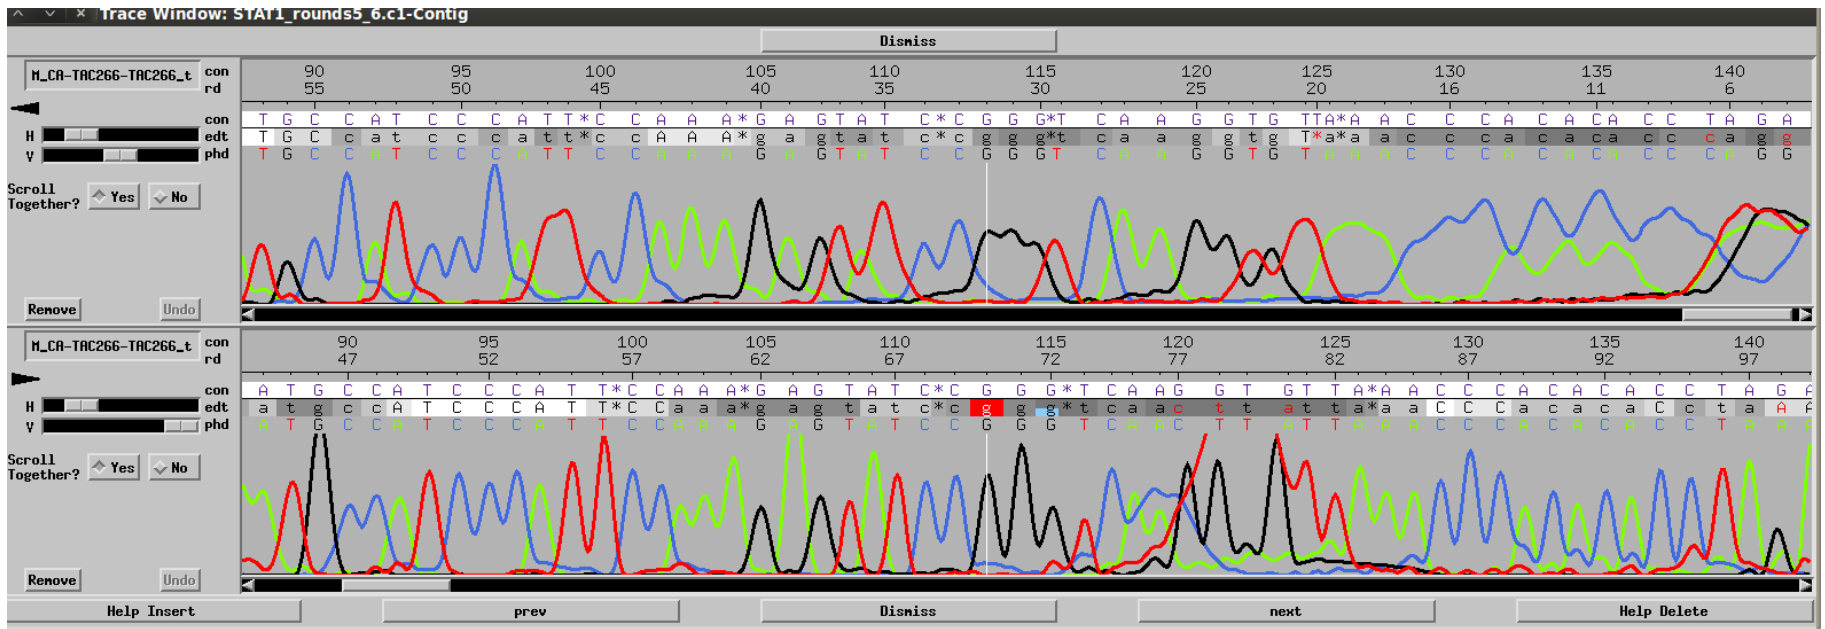

# TAC268 L. tho.

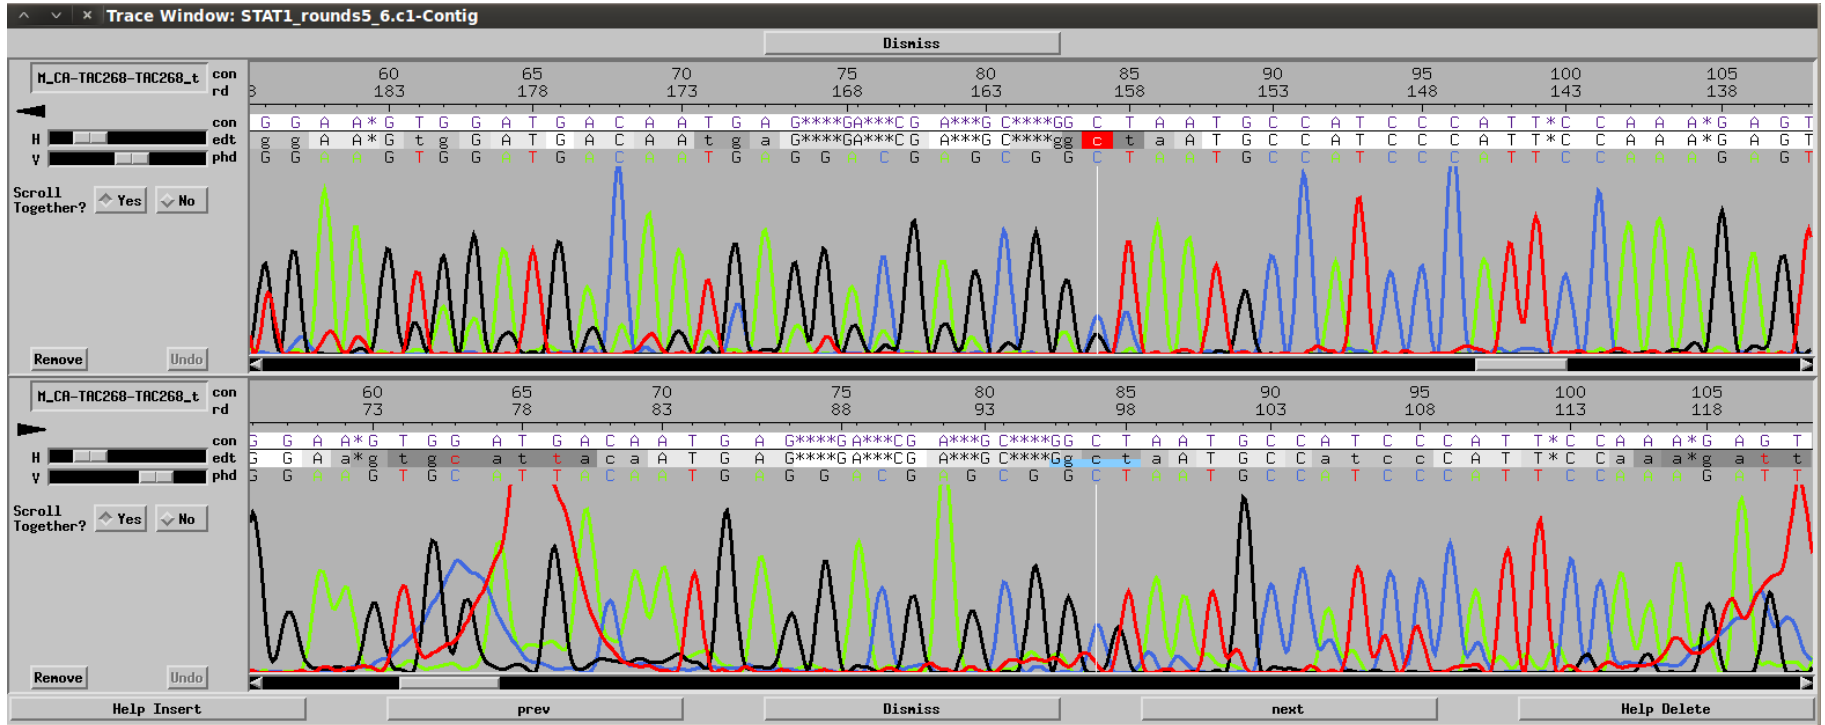

# TAC269 L. cerv.

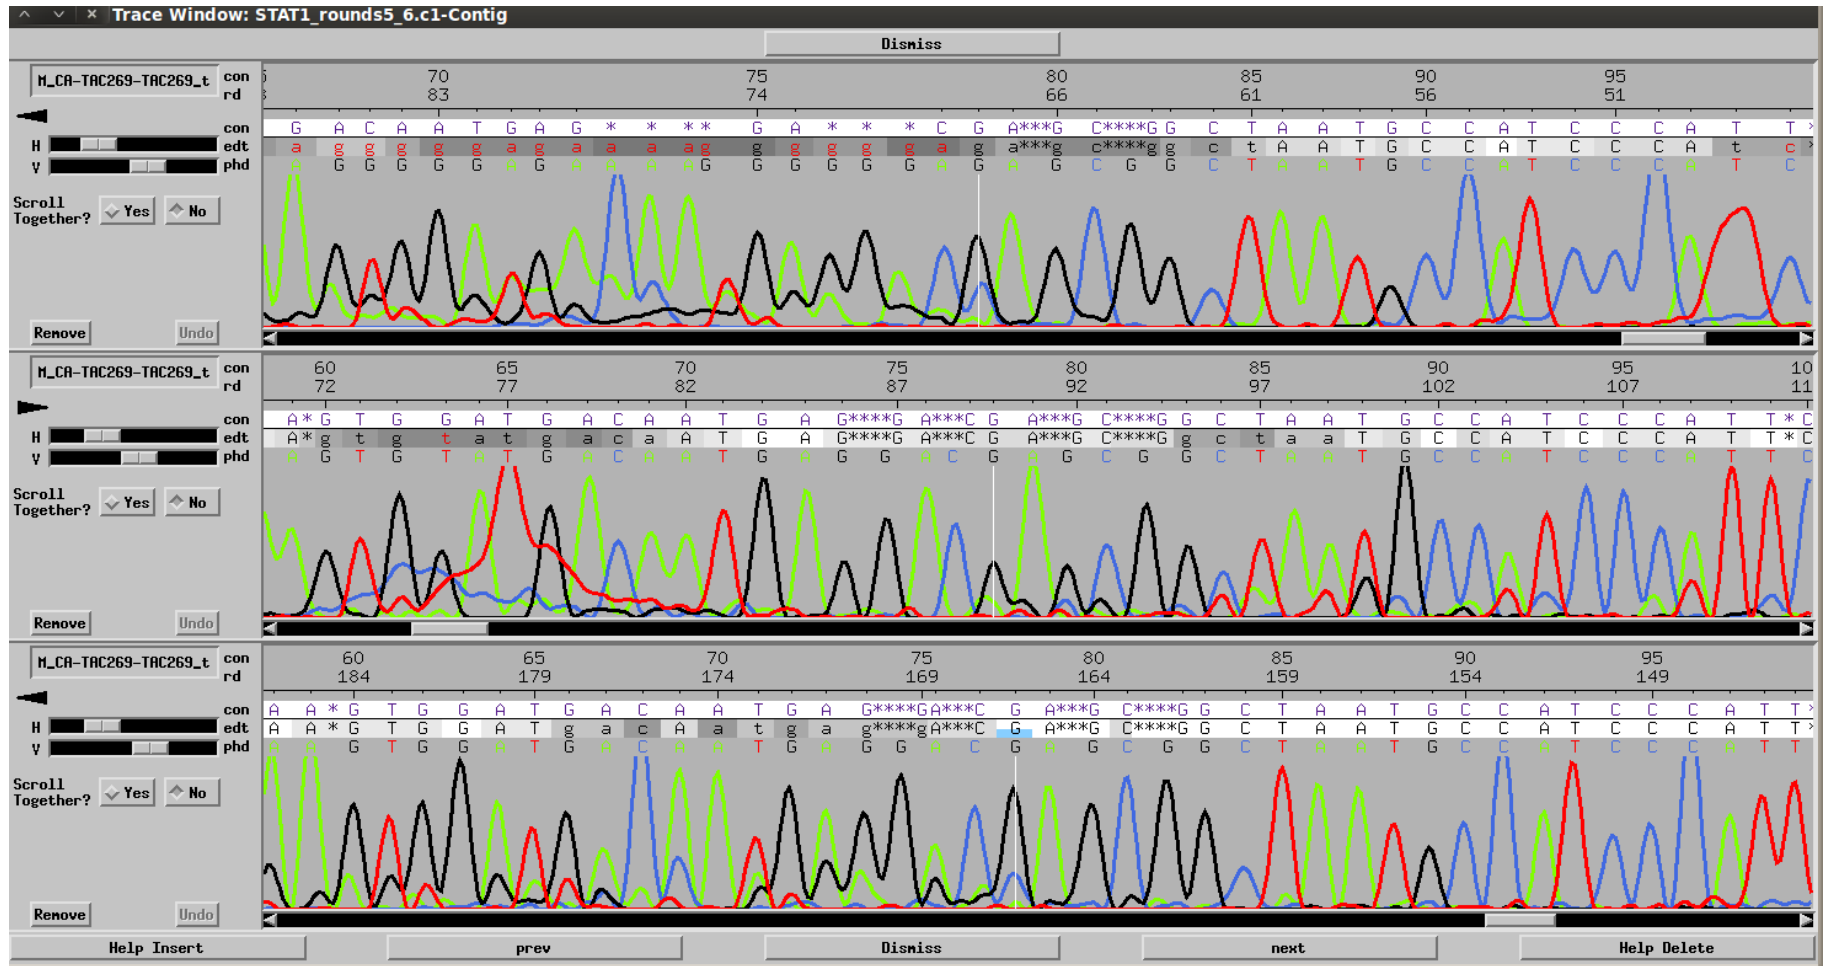



# TAC270 L. cerv.

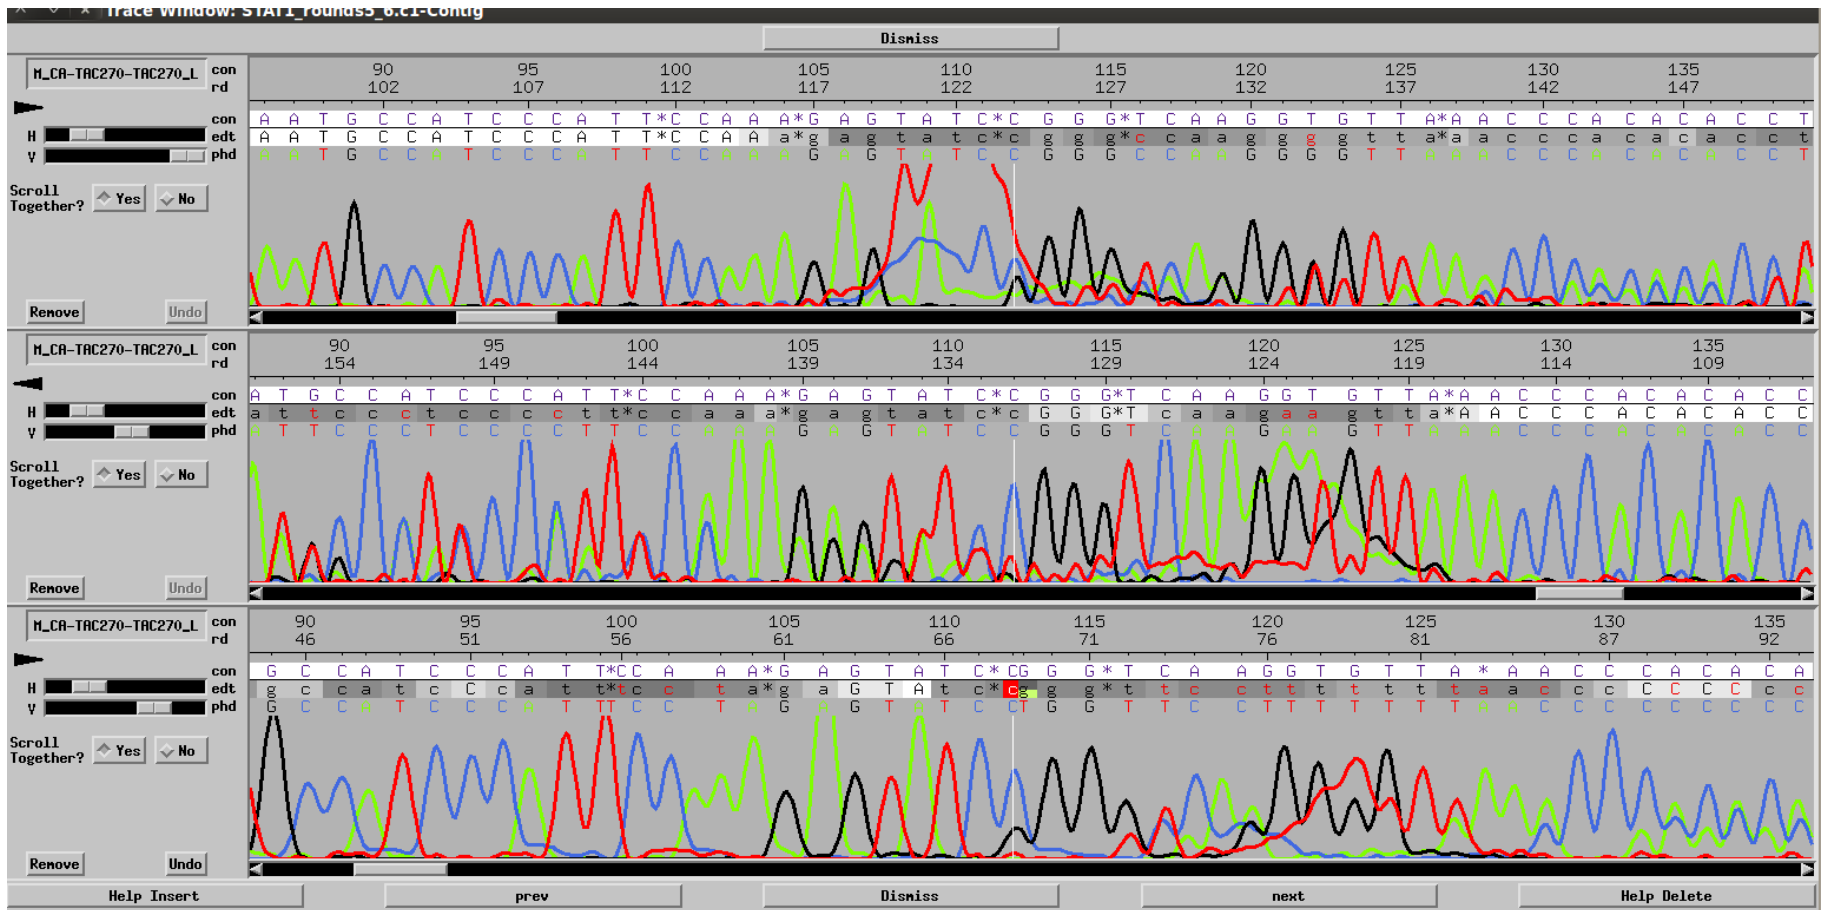

# TAC270 L. ing.

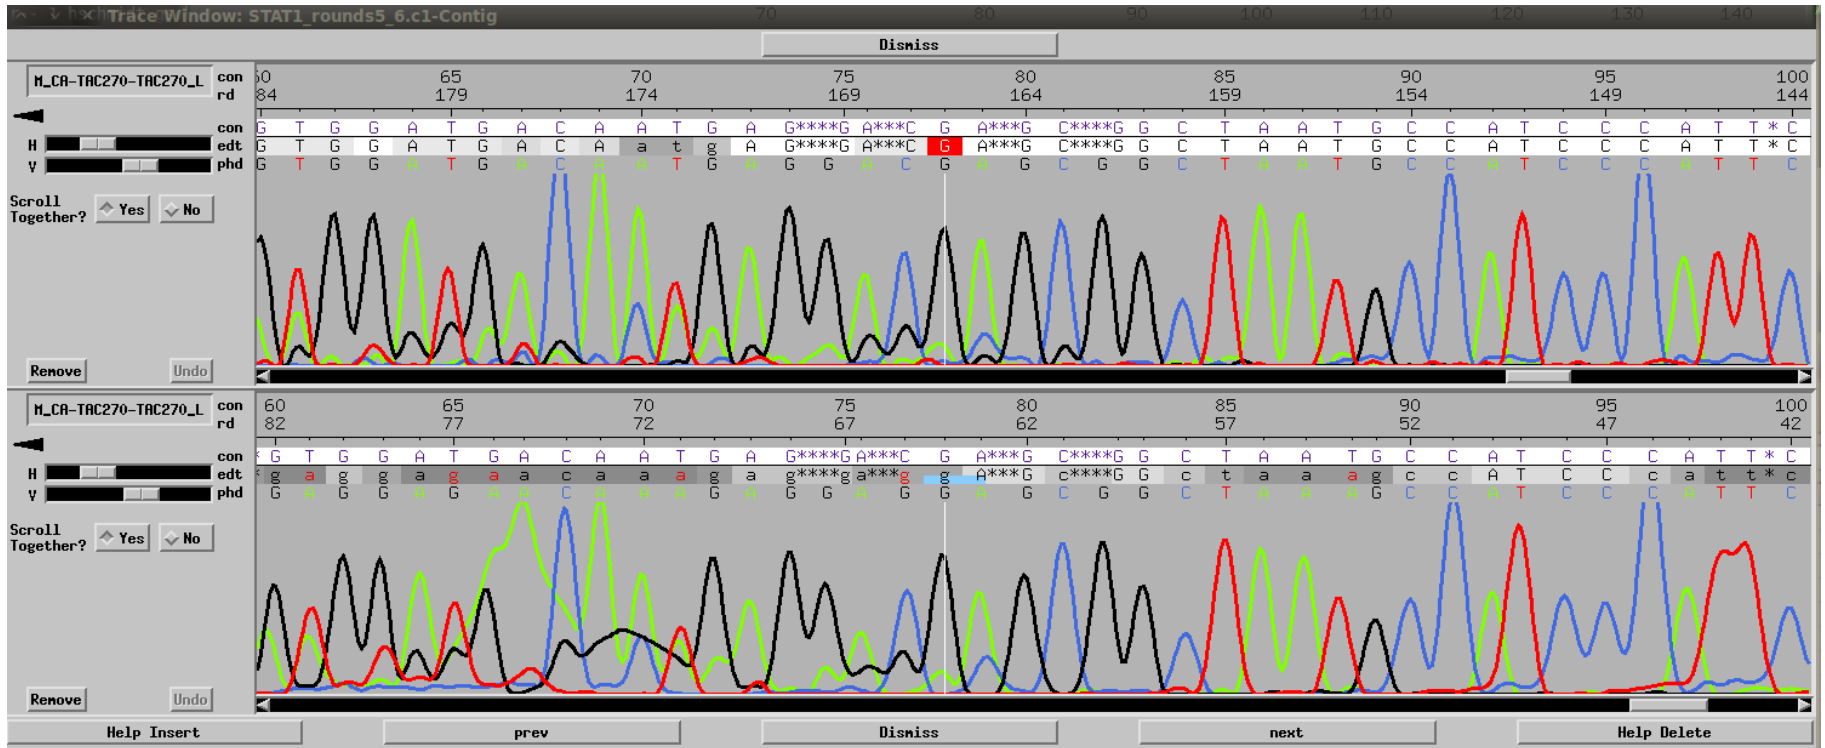

# TAC271 R. tho.

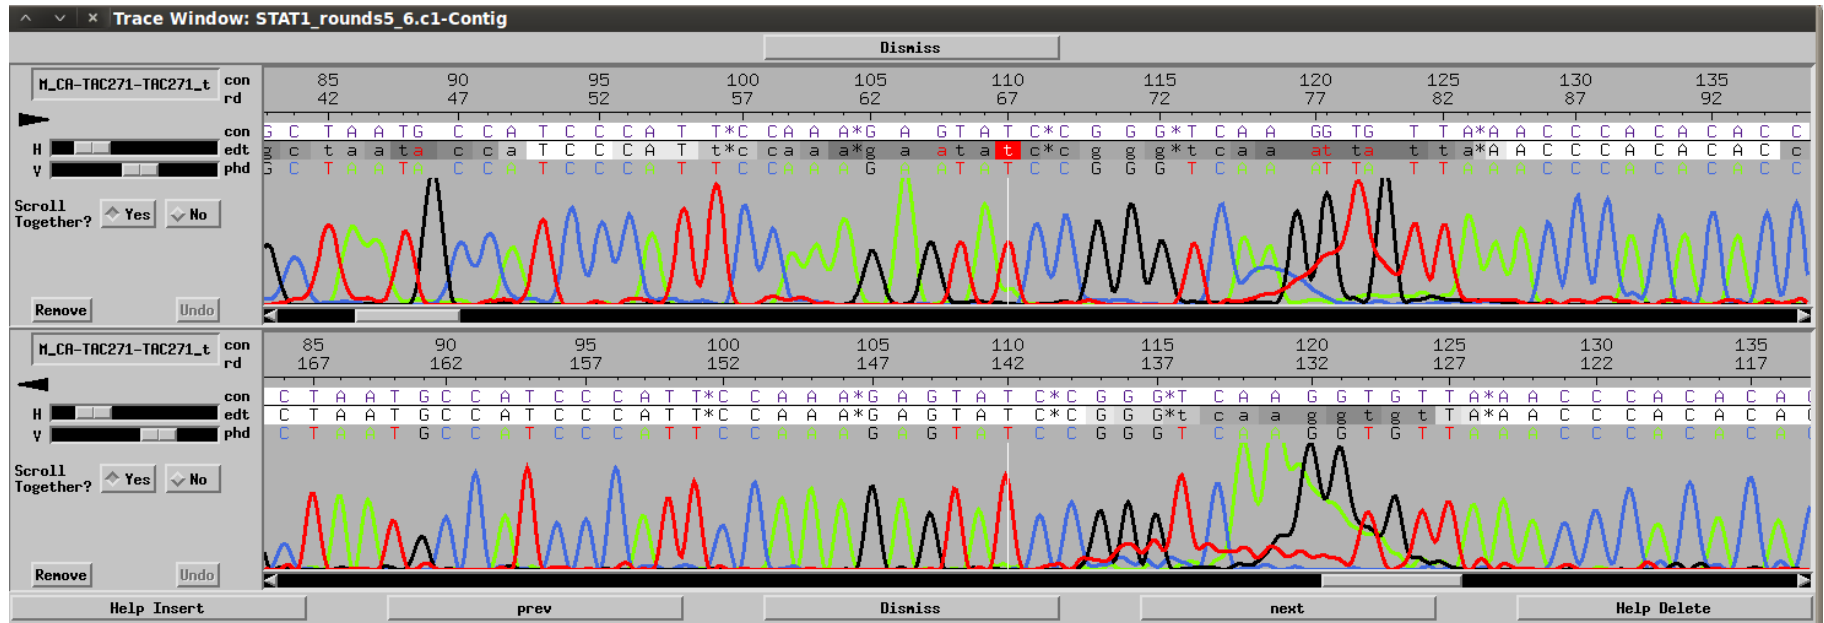

# TAC272 L. tho.

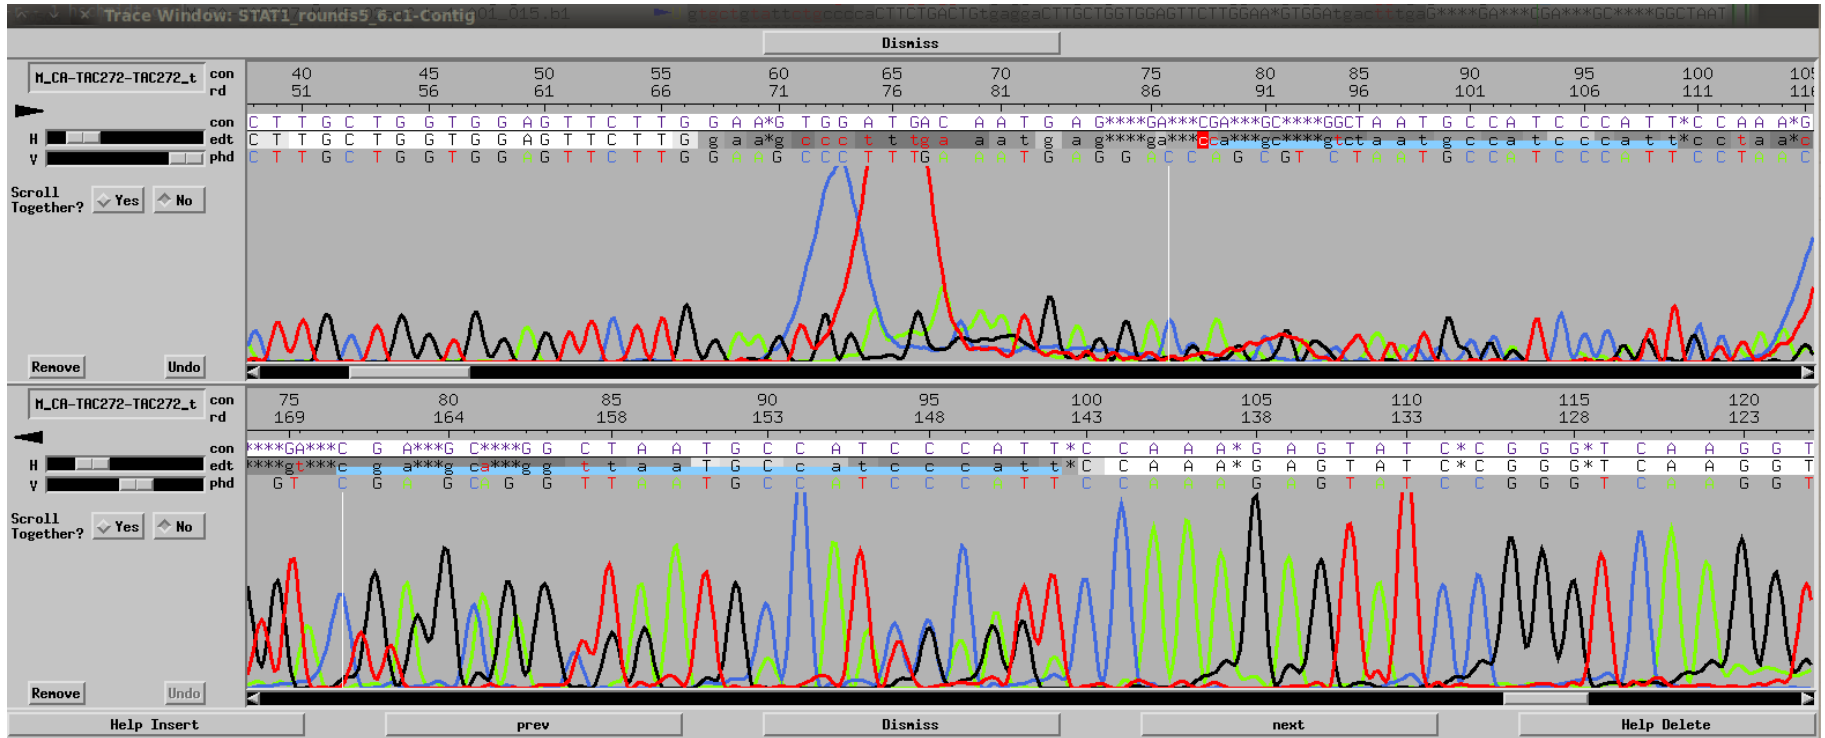

# TAC273 L. tho.

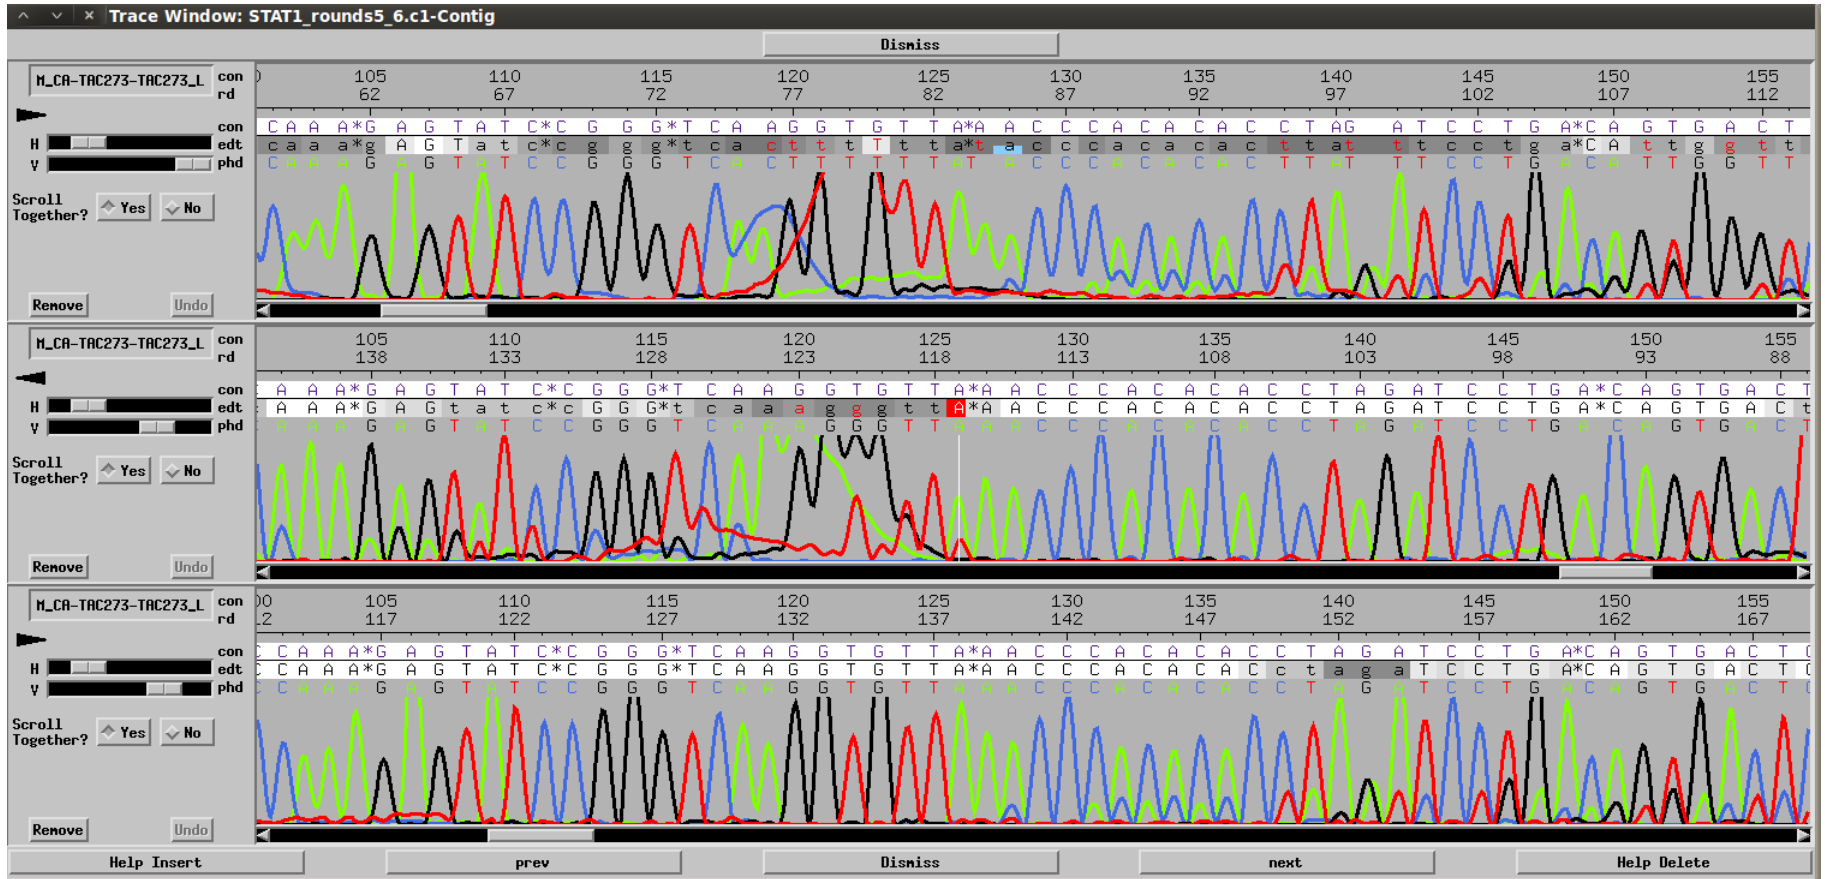

# TAC273 R. ing.

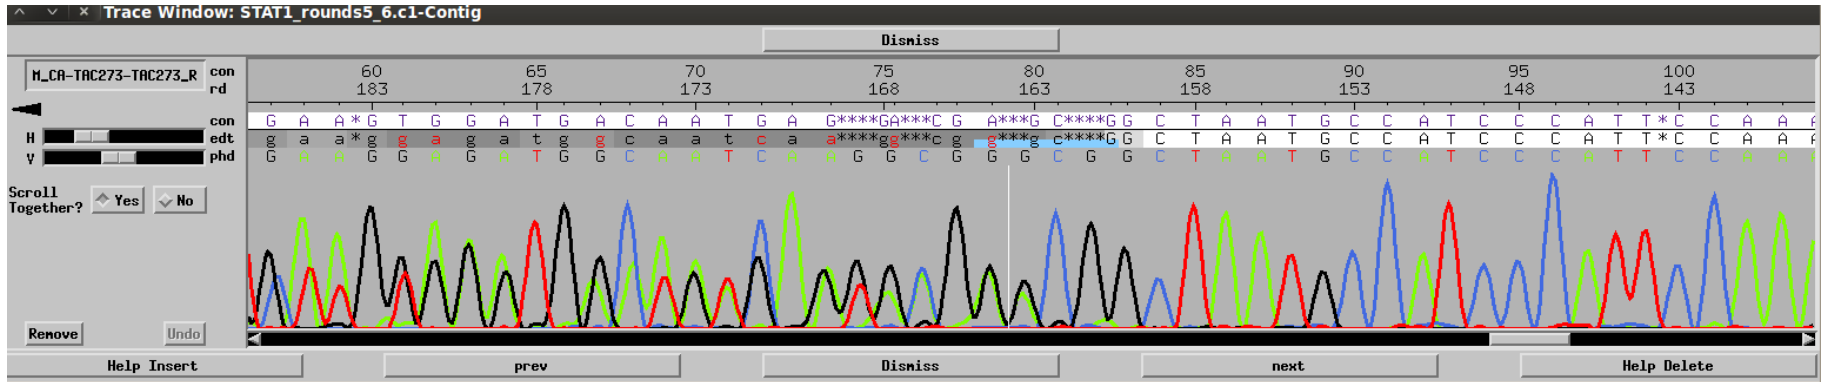

# TAC274 R. ing.

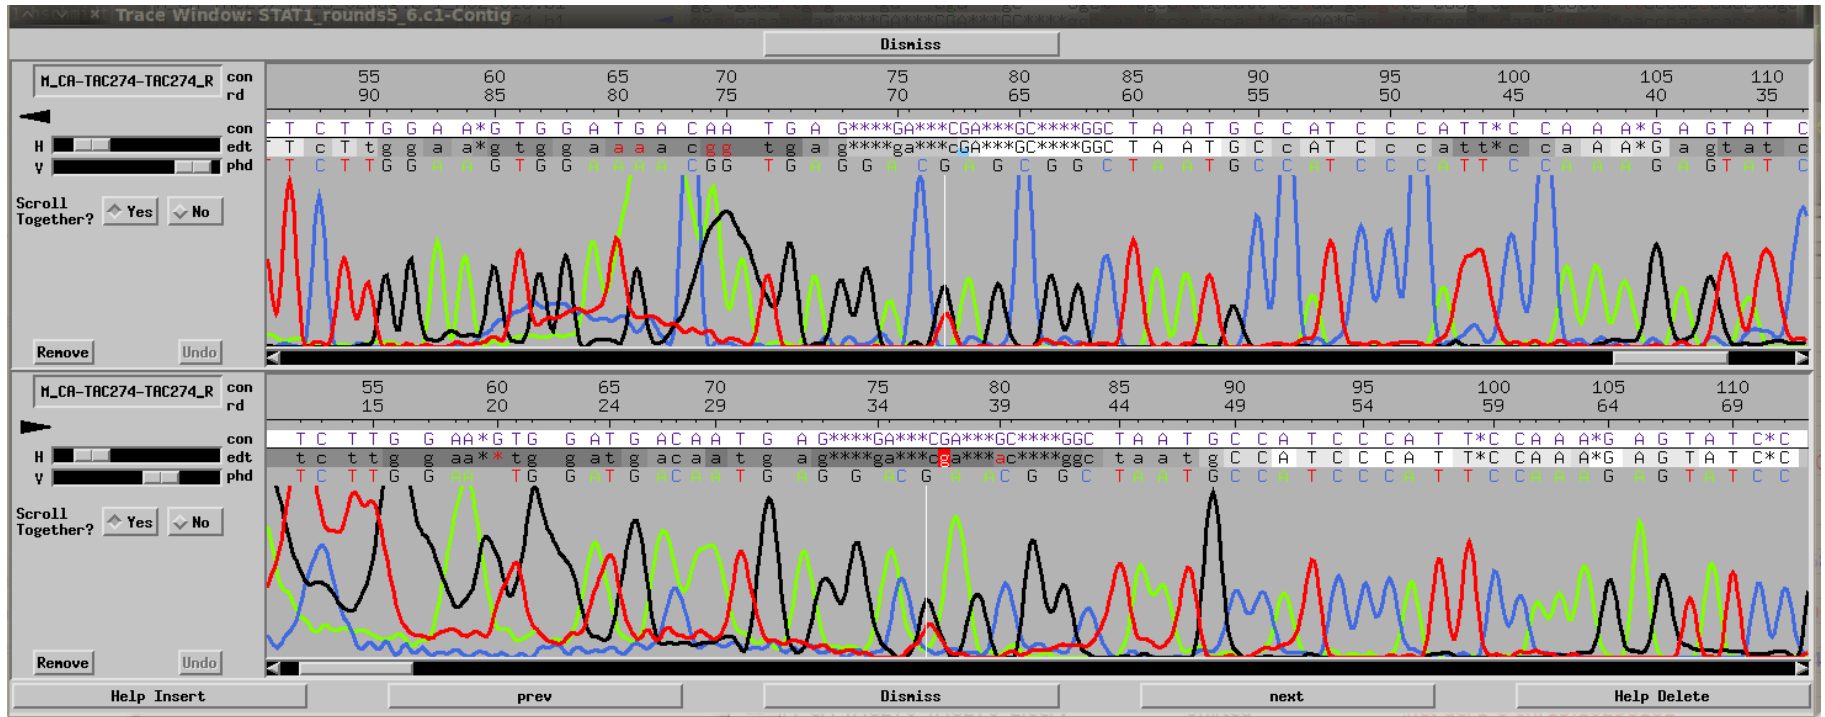

Supplement: NIHMS814284-supplement-Appendix_2.pdf [file NIHMS814284-supplement-Appendix_2.pdf]
