# Supplementary material
Source: PubMed Central journal article supplement (PMC5557050)

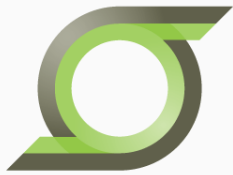

The Elizabeth H.  
and James S. McDonnell III

**MCDONNELL  
GENOME INSTITUTE**

at Washington University

Sanger traces for *Prlr* extension to additional tumor and non-tumor samples

# OVX13R1R2 L. ing. - G/O

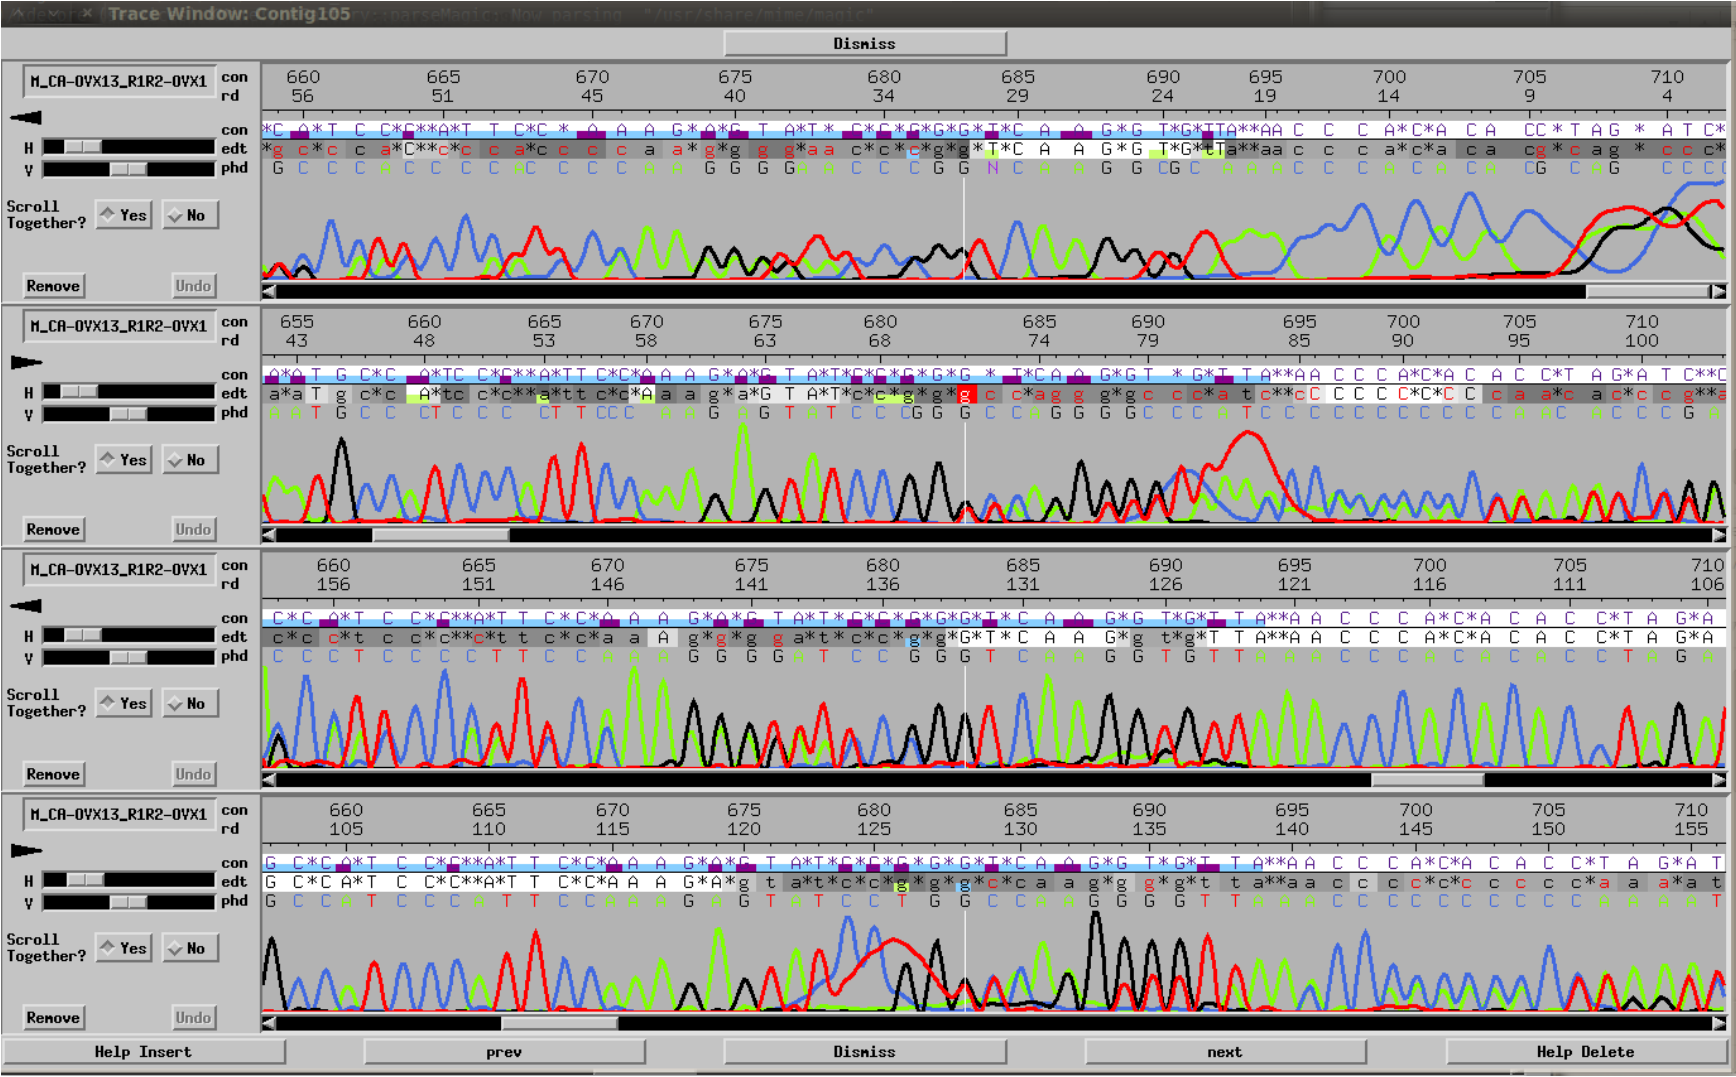

# TAC297 L. tho. - C/O

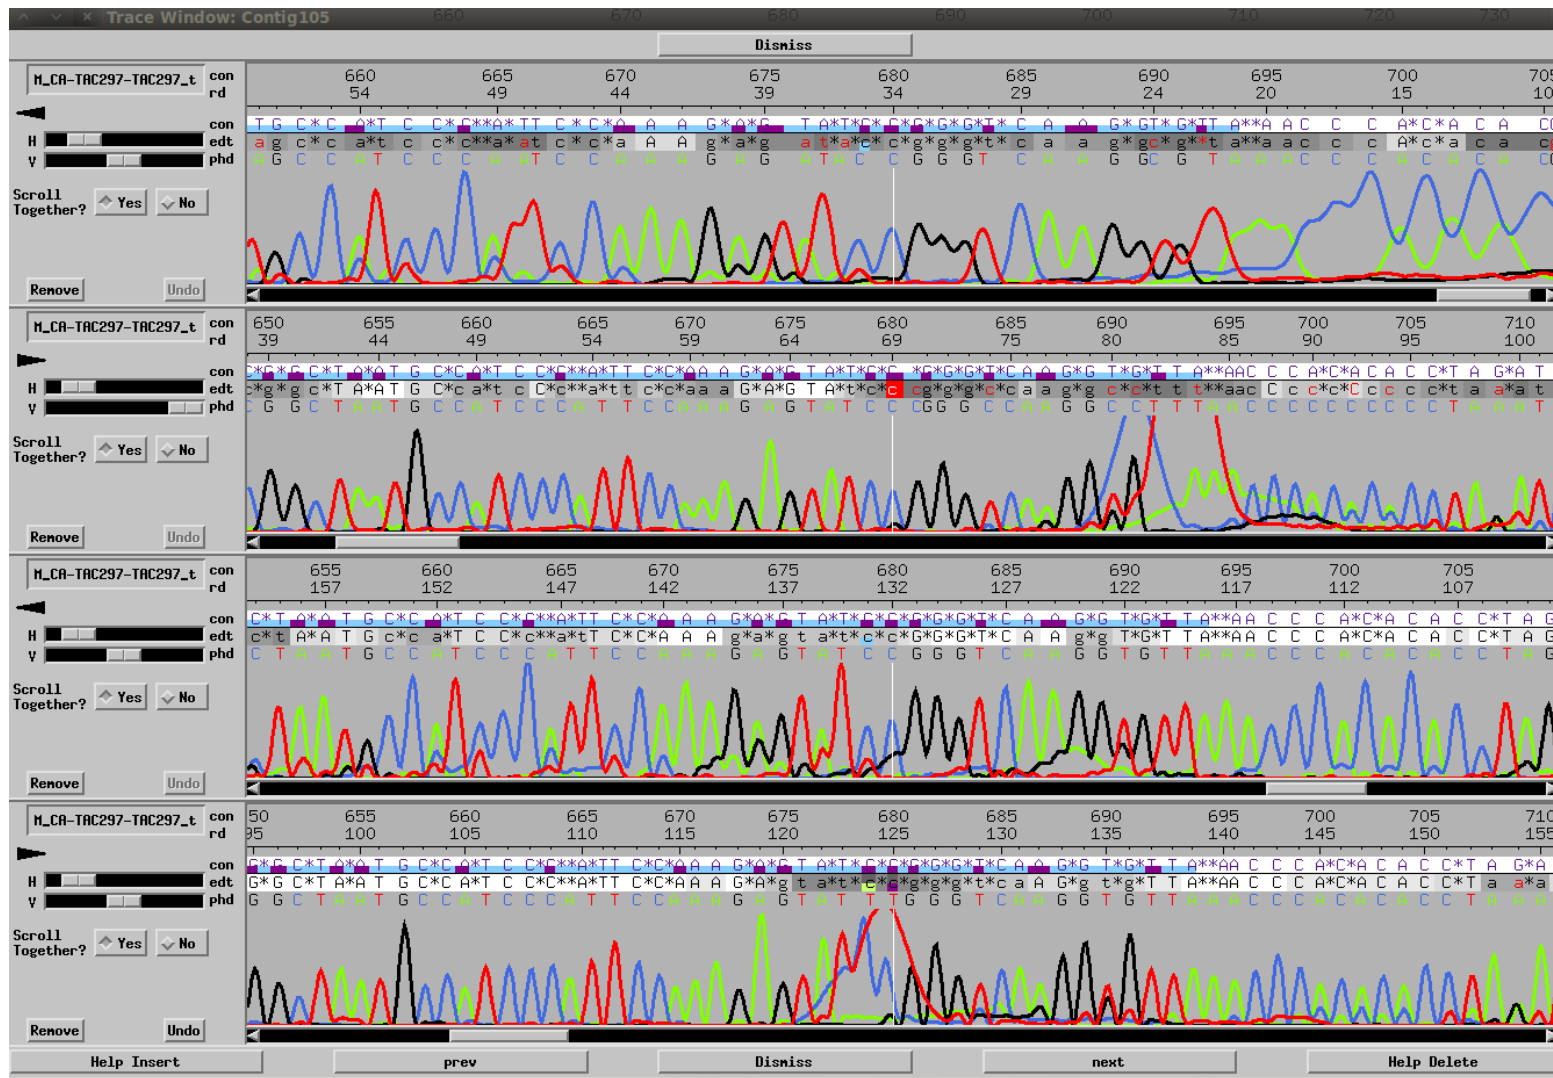

# TAC298 L. tho. - AG/0

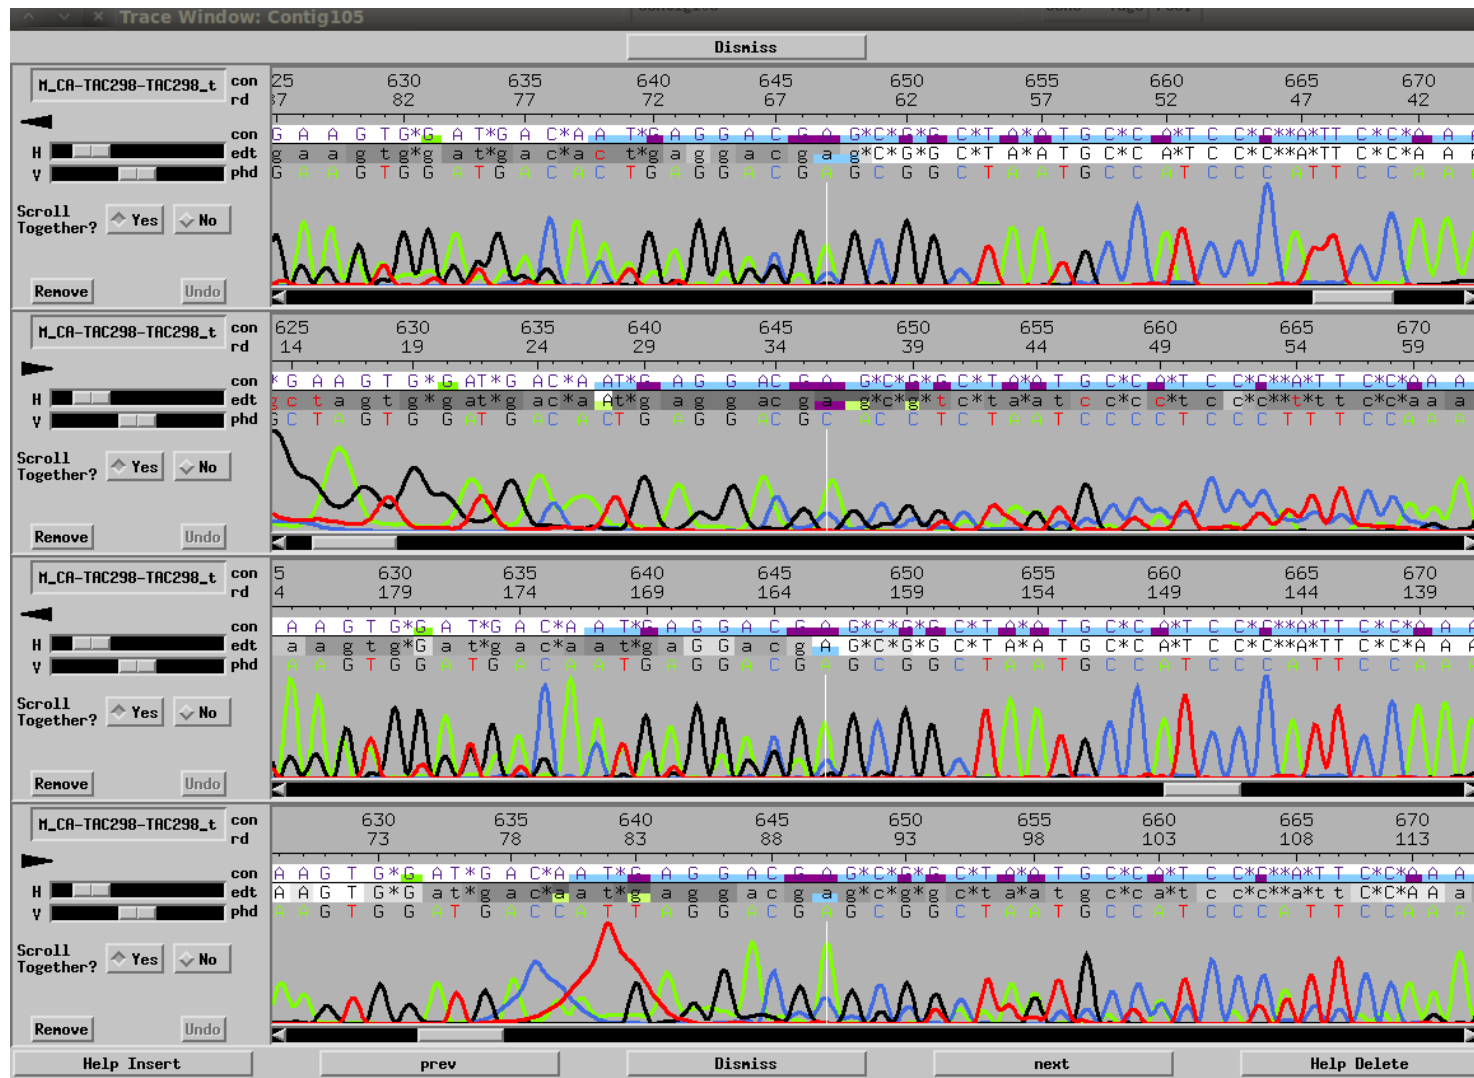

# TAC299 R. tho. - G/T

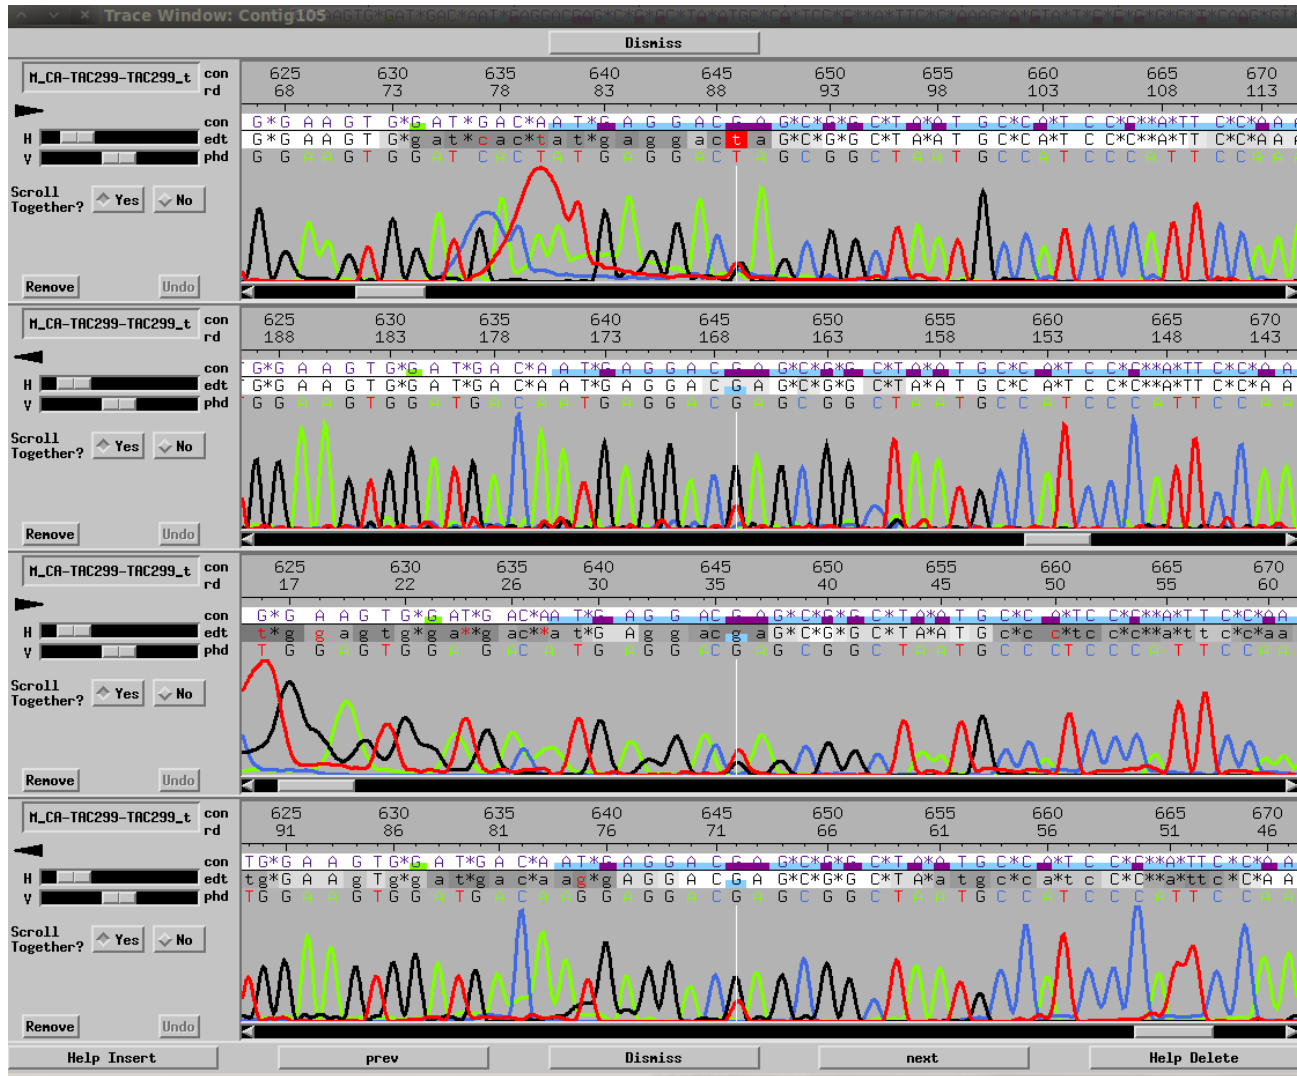

# TAC300 L. tho. - C/O

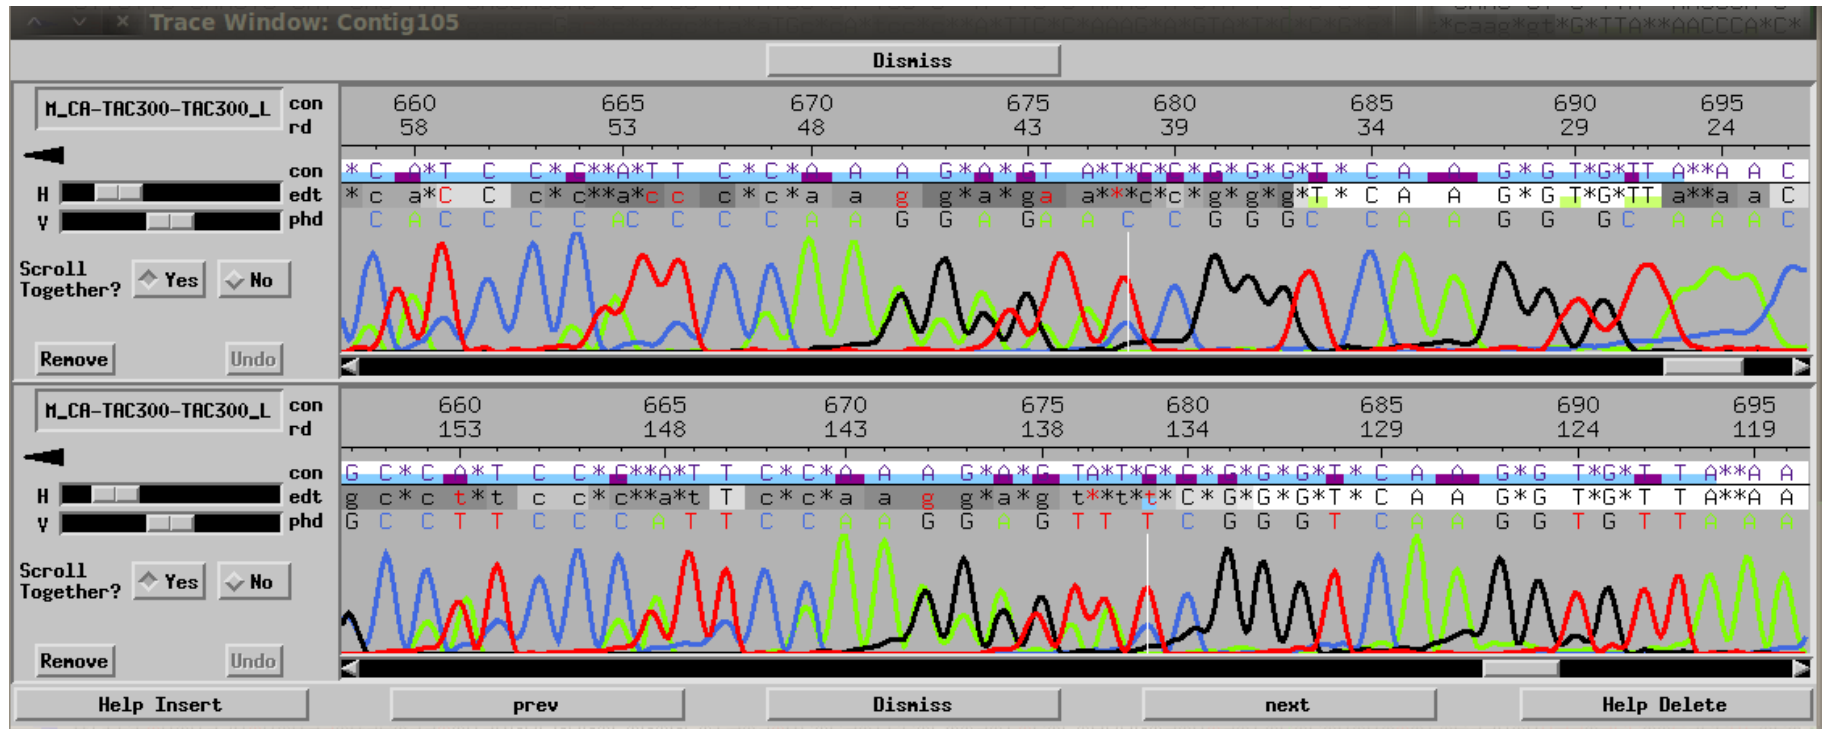

# TAC300 R. ing. - T/O

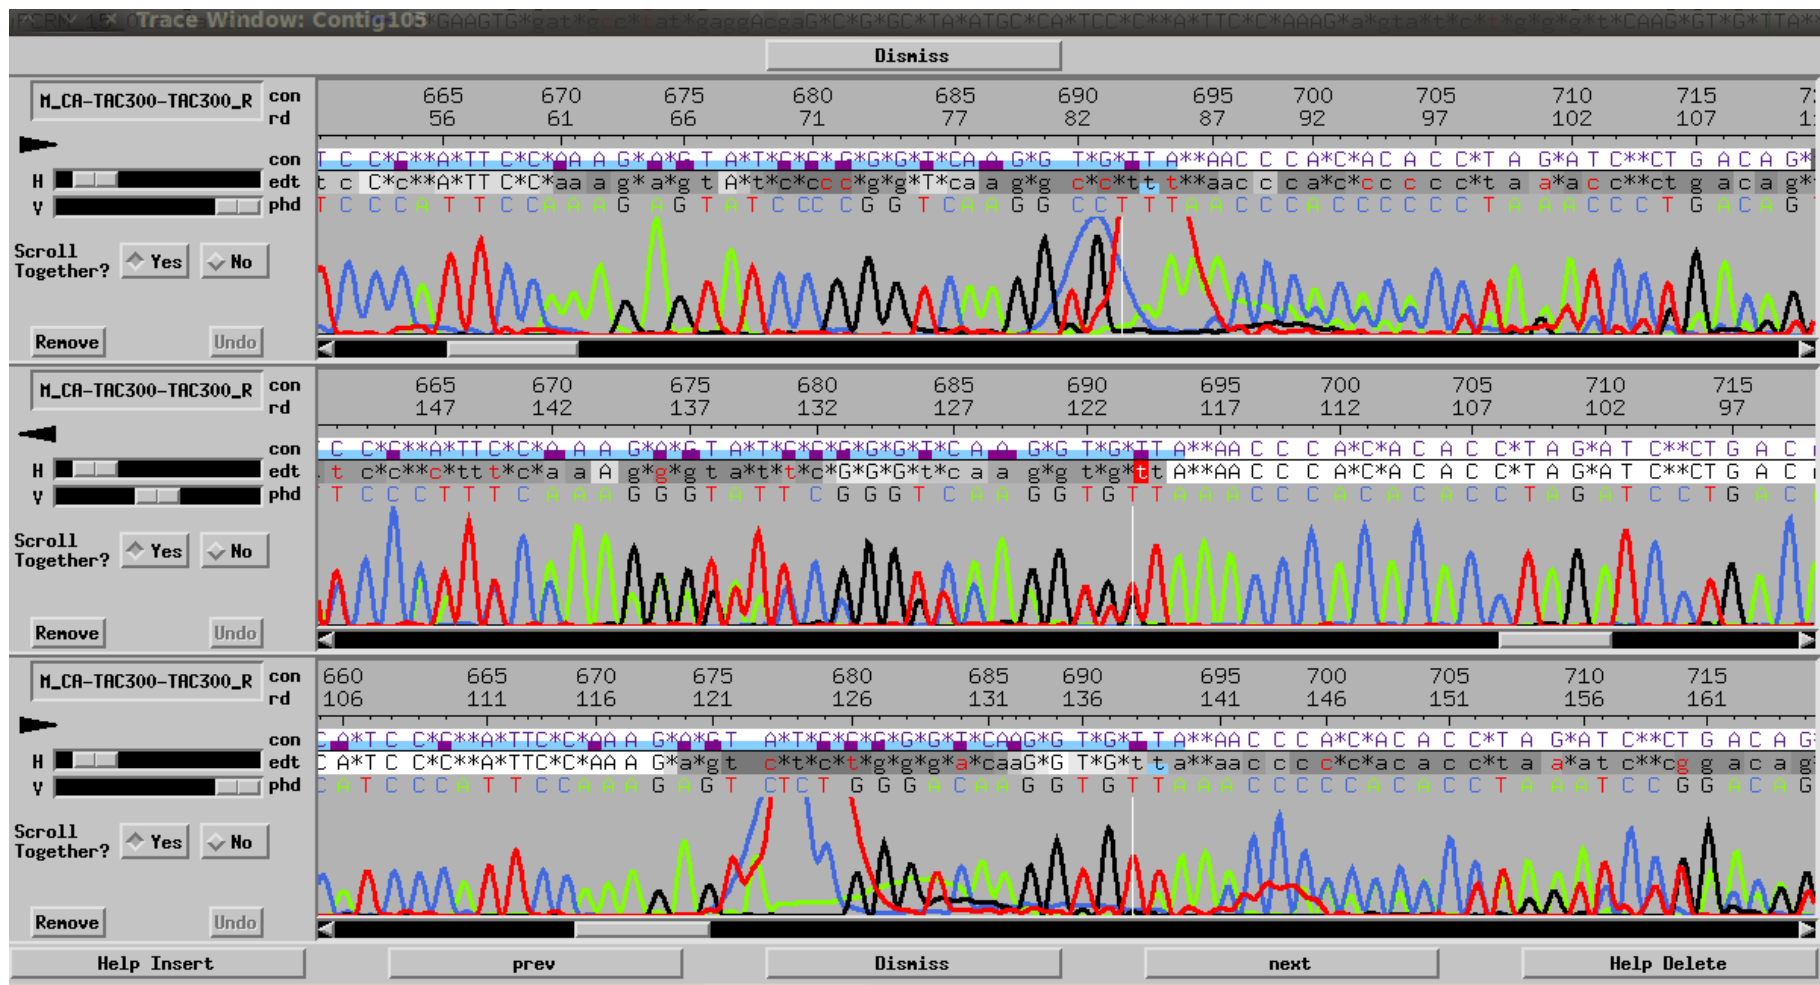

# TAC301 L. tho. - GGCTAATGCCATCCCATTTC/0

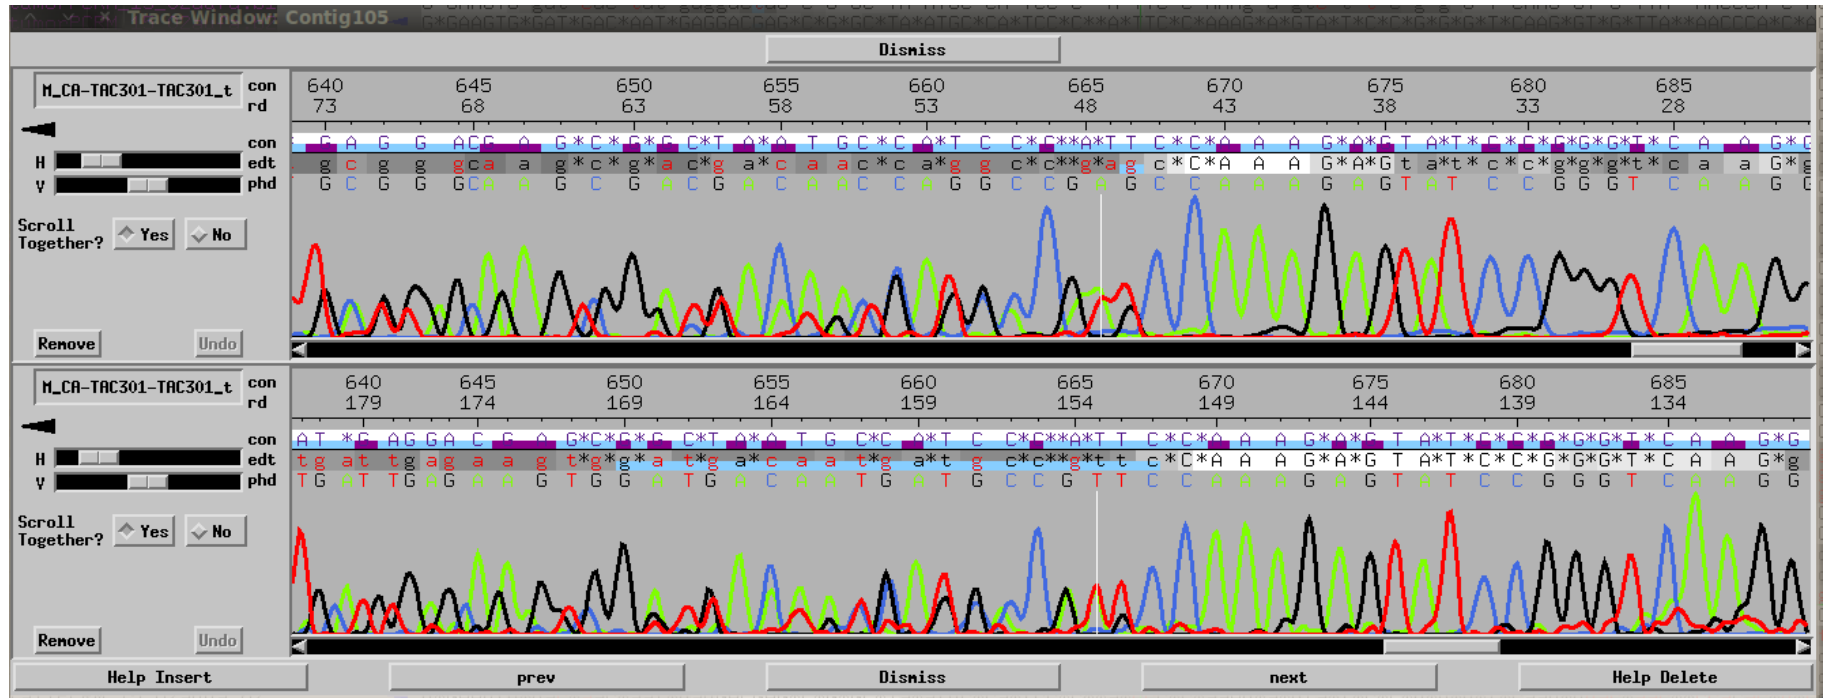



# TAC302 R. cerv. - AGGACGAG/0

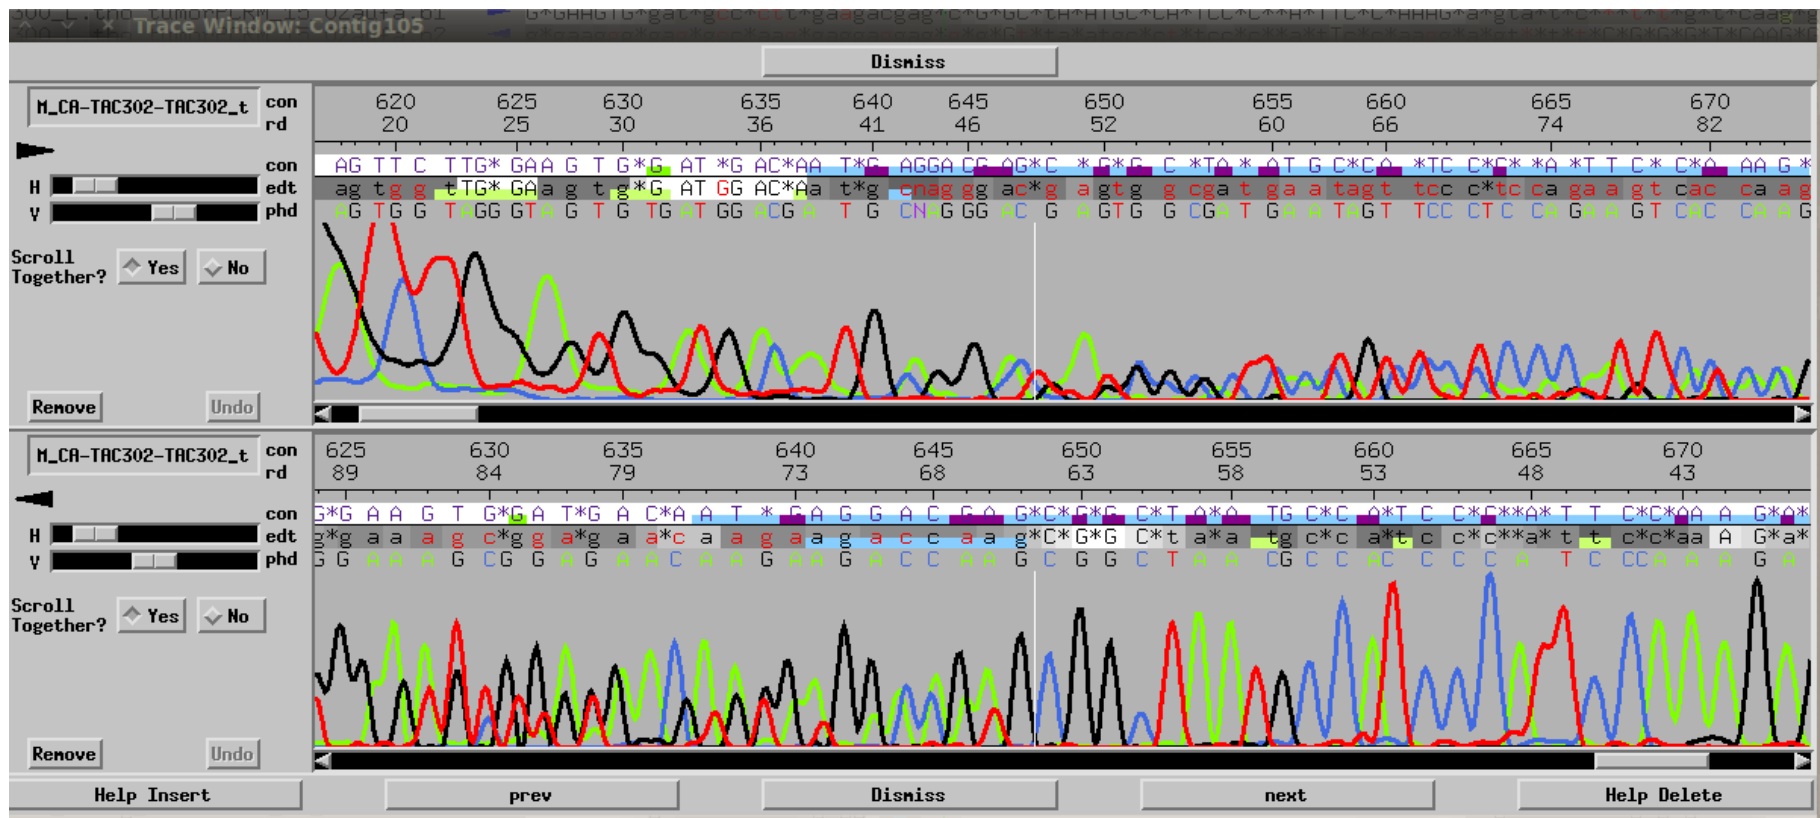

# TAC311 L. cerv. - G/O

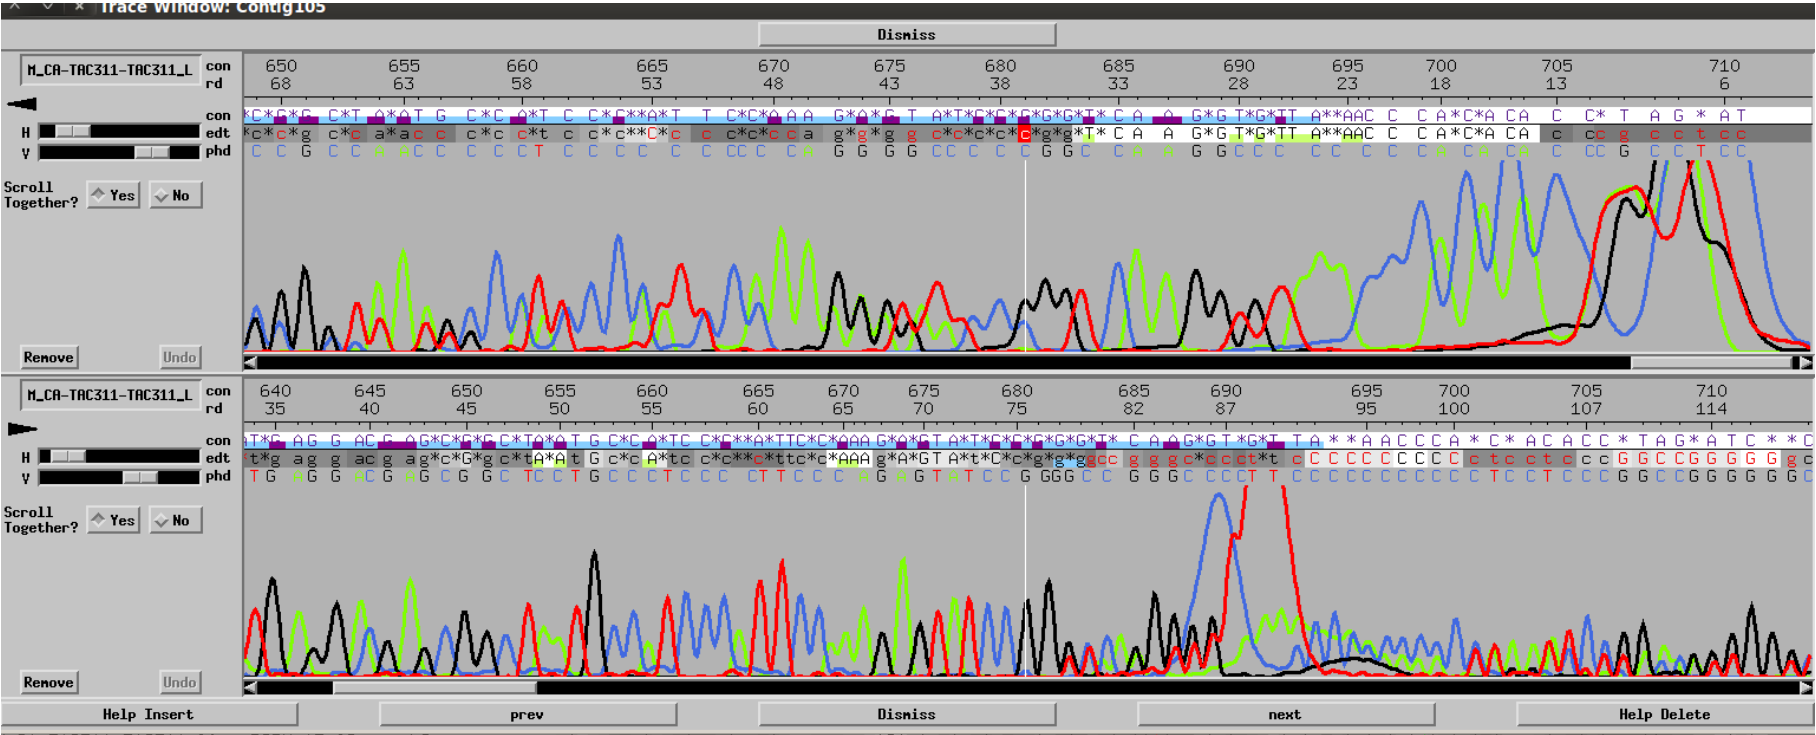

# TAC311 L. ing. - G/T

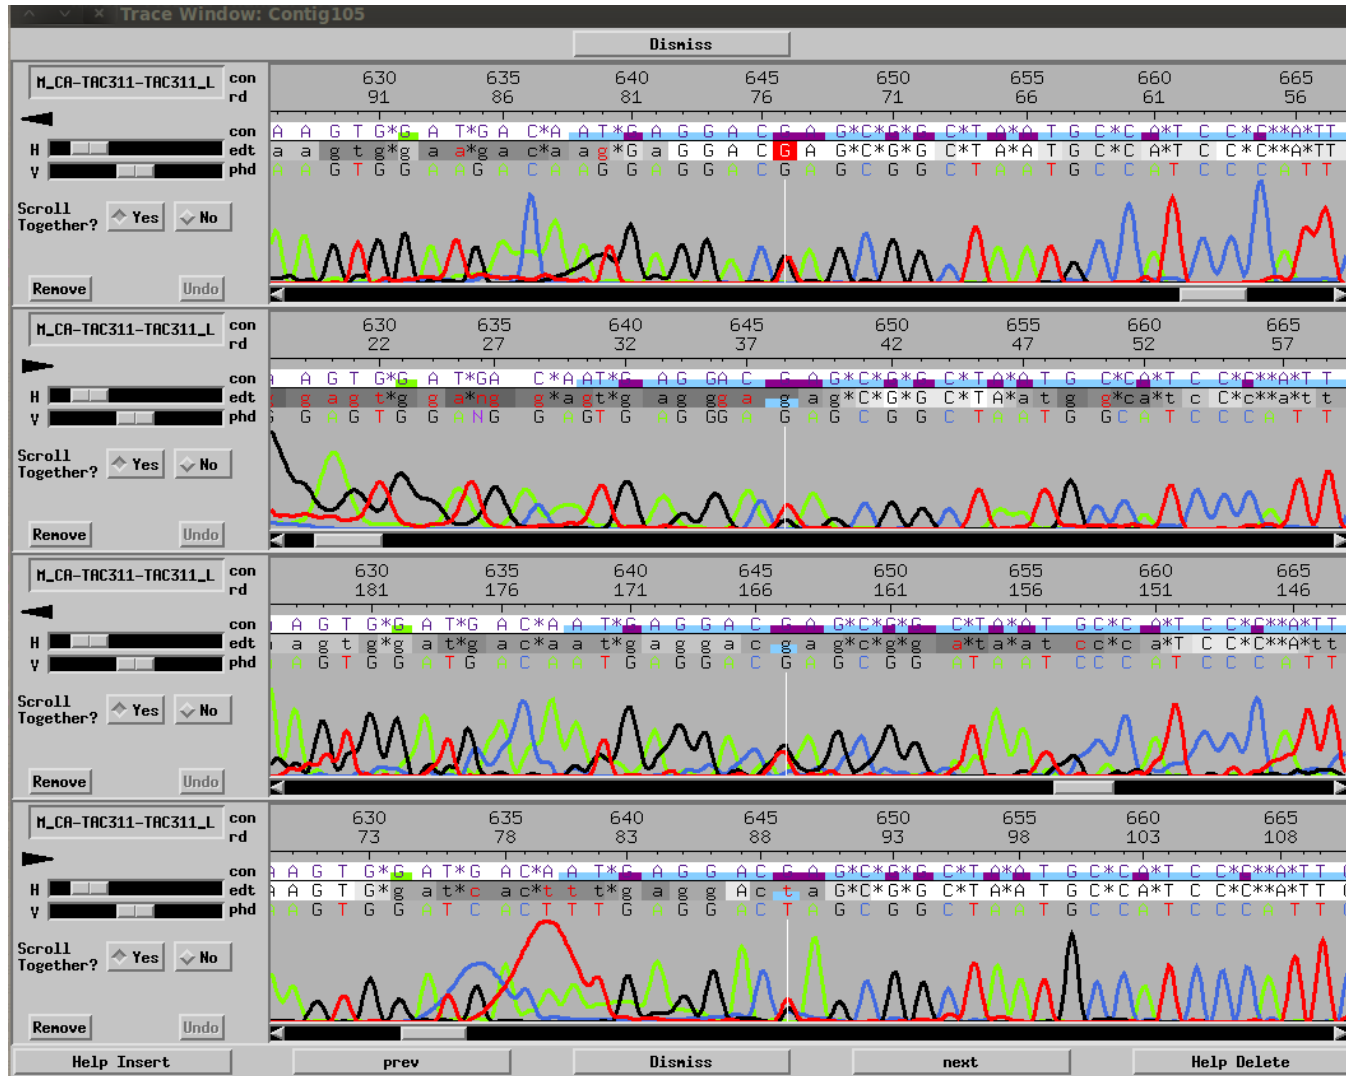

# Wild-type example traces - TAC311 ovary, SFWT1A tail

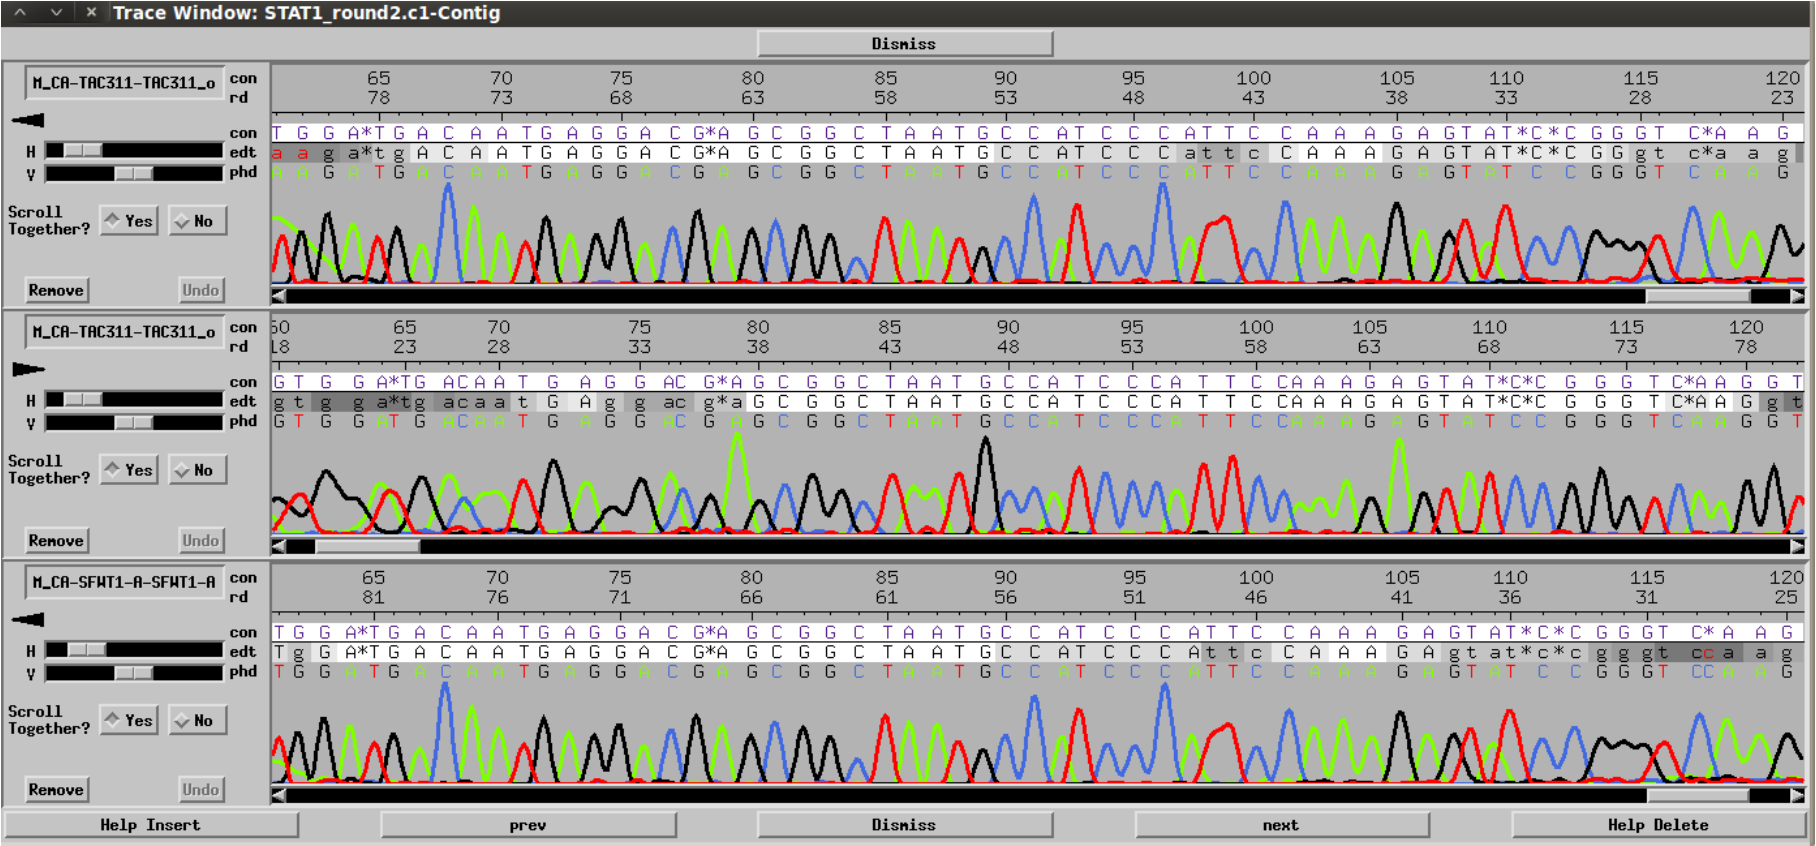

Supplement: NIHMS814284-supplement-Appendix_3.pdf [file NIHMS814284-supplement-Appendix_3.pdf]
