# Supplementary material
Source: PubMed Central journal article supplement (PMC5557050)
Supplement: NIHMS814284-supplement-Appendix_4.pdf [file NIHMS814284-supplement-Appendix_4.pdf]

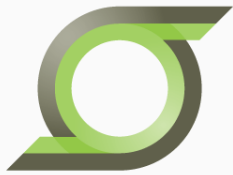

The Elizabeth H.  
and James S. McDonnell III

**MCDONNELL  
GENOME INSTITUTE**

at Washington University

Screenshots from IGV for *Prlr*  
validation of two WGS samples from  
FFPE and extension to DCIS samples  
by MiSeq

# Sample: TAC246 R. ing.

| Chromosome | start    | stop     | reference | variant |
|------------|----------|----------|-----------|---------|
| 15         | 10258178 | 10258186 | ATCCGGGTC | -       |

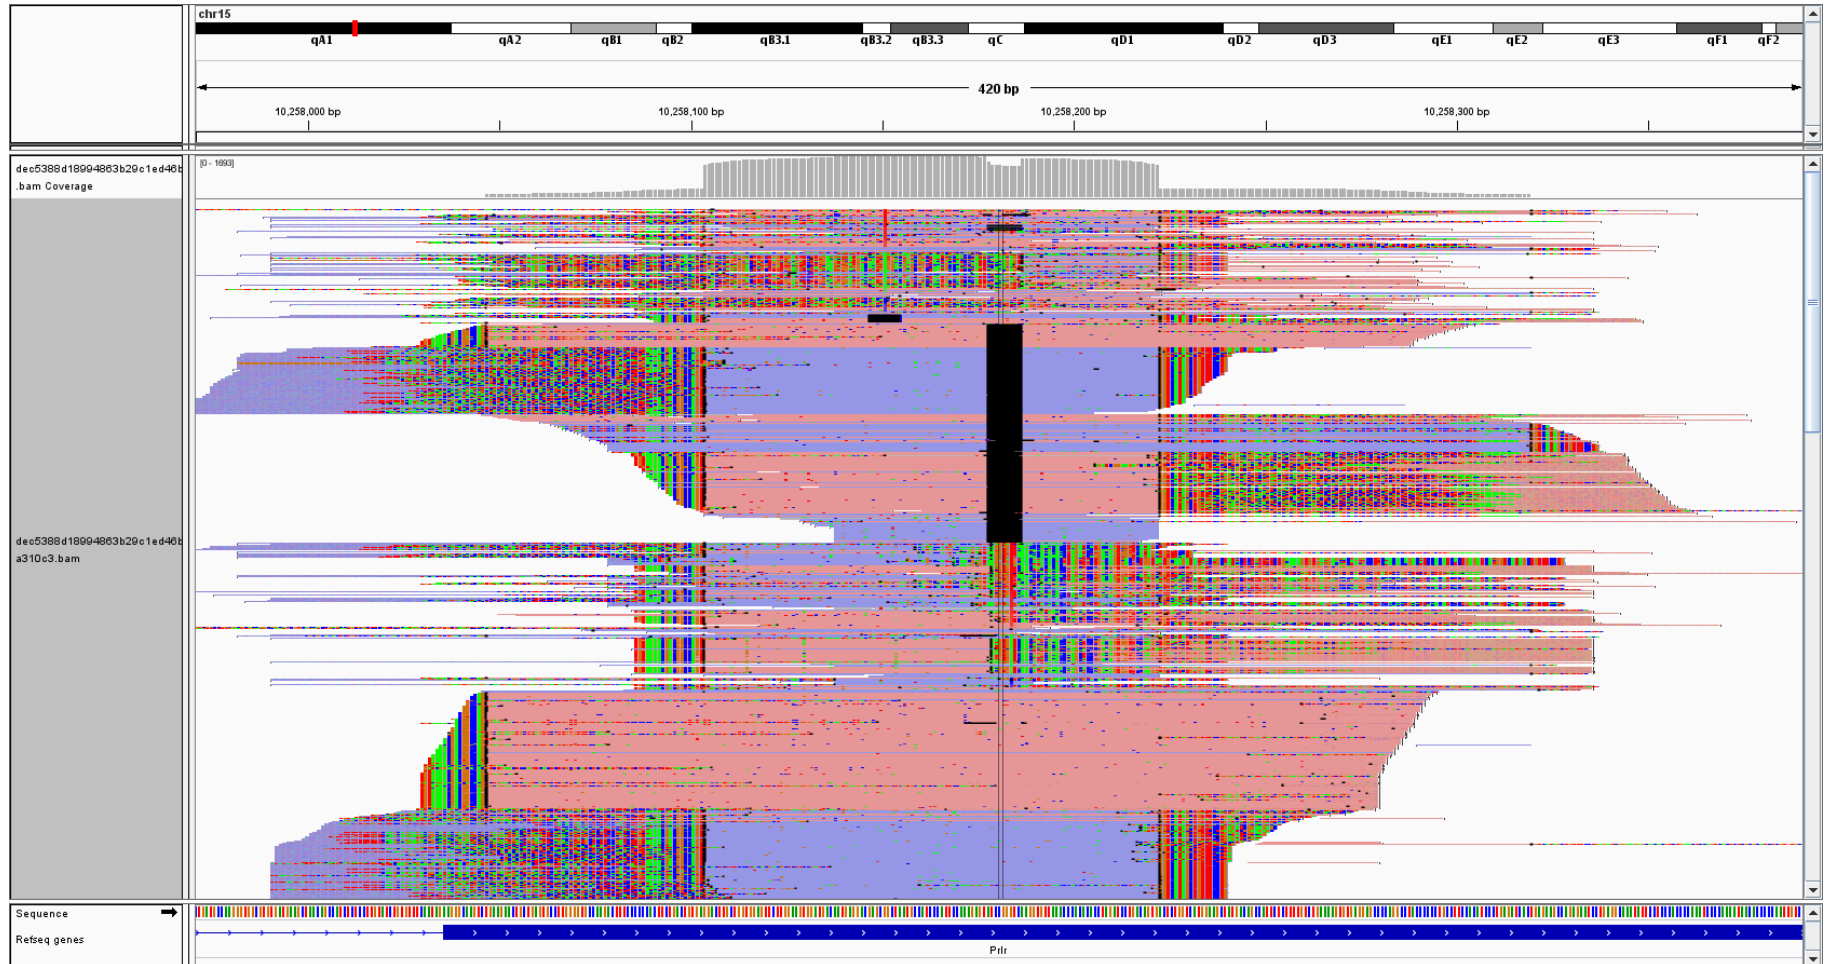

# Sample: TAC247 L. cerv.

| Chromosome | start    | stop     | reference        | variant |
|------------|----------|----------|------------------|---------|
| 15         | 10258147 | 10258147 | G                | -       |
| 15         | 10258153 | 10258168 | CTAATGCCATCCCATT | -       |

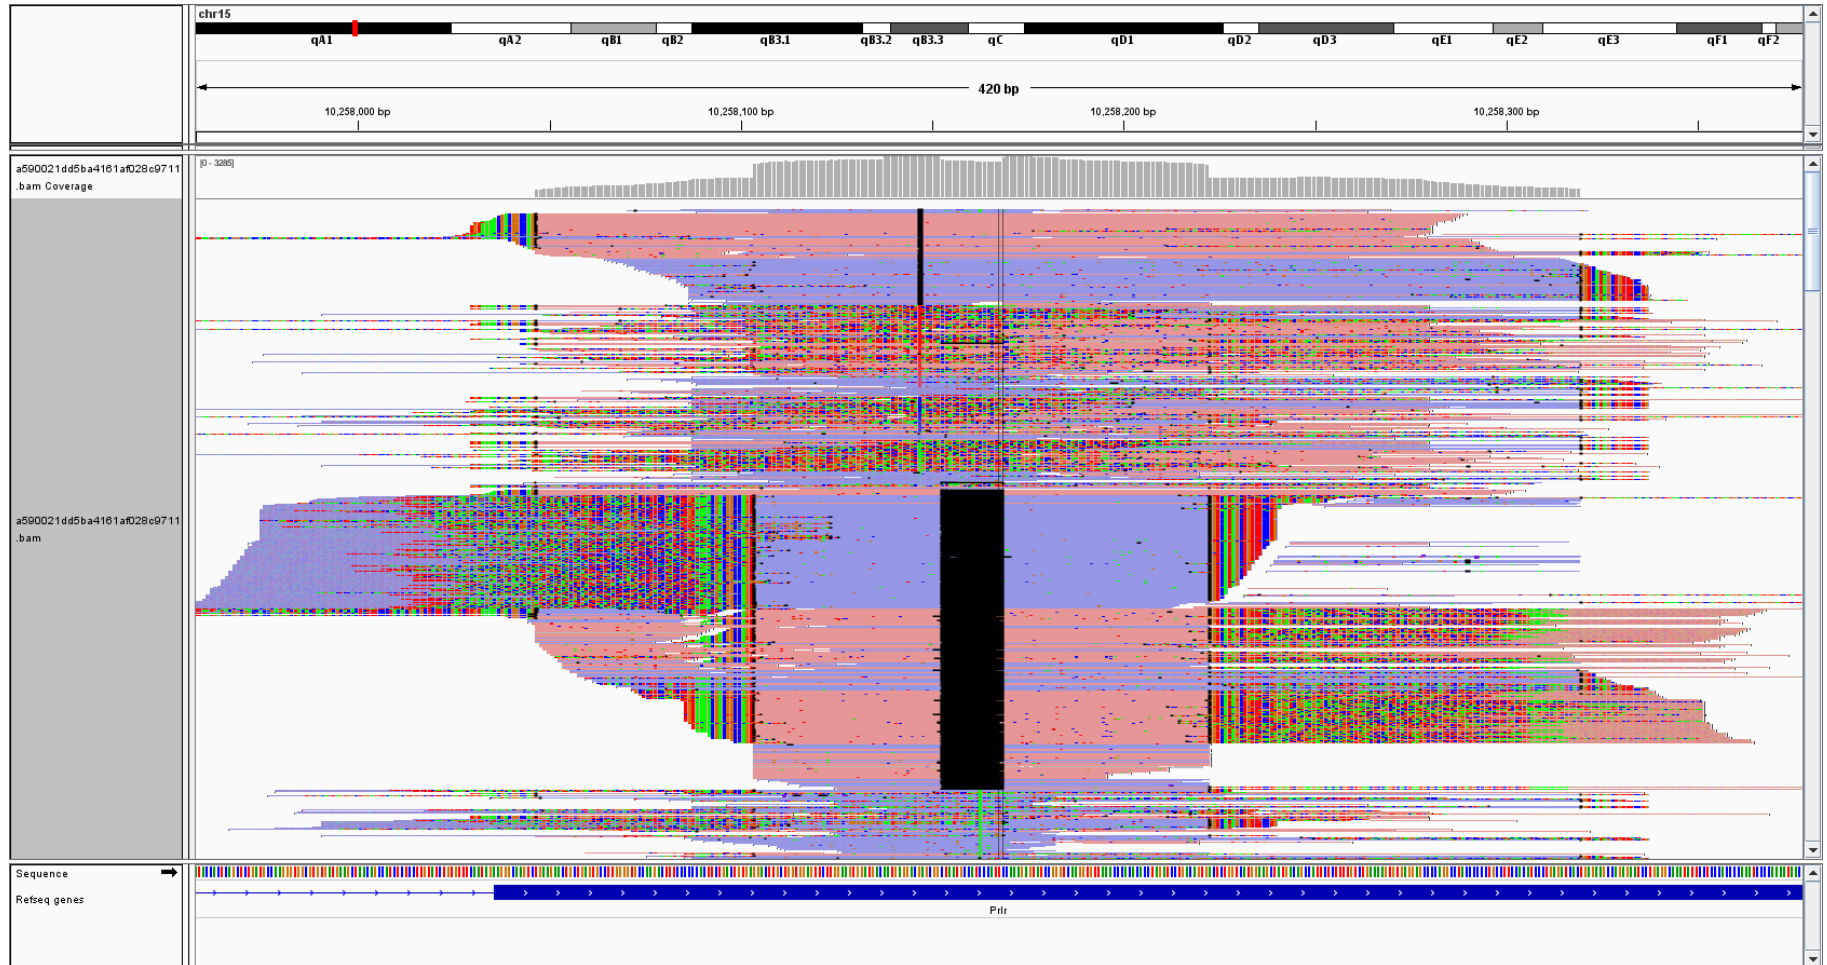

# Sample: TAC297 R. tho.

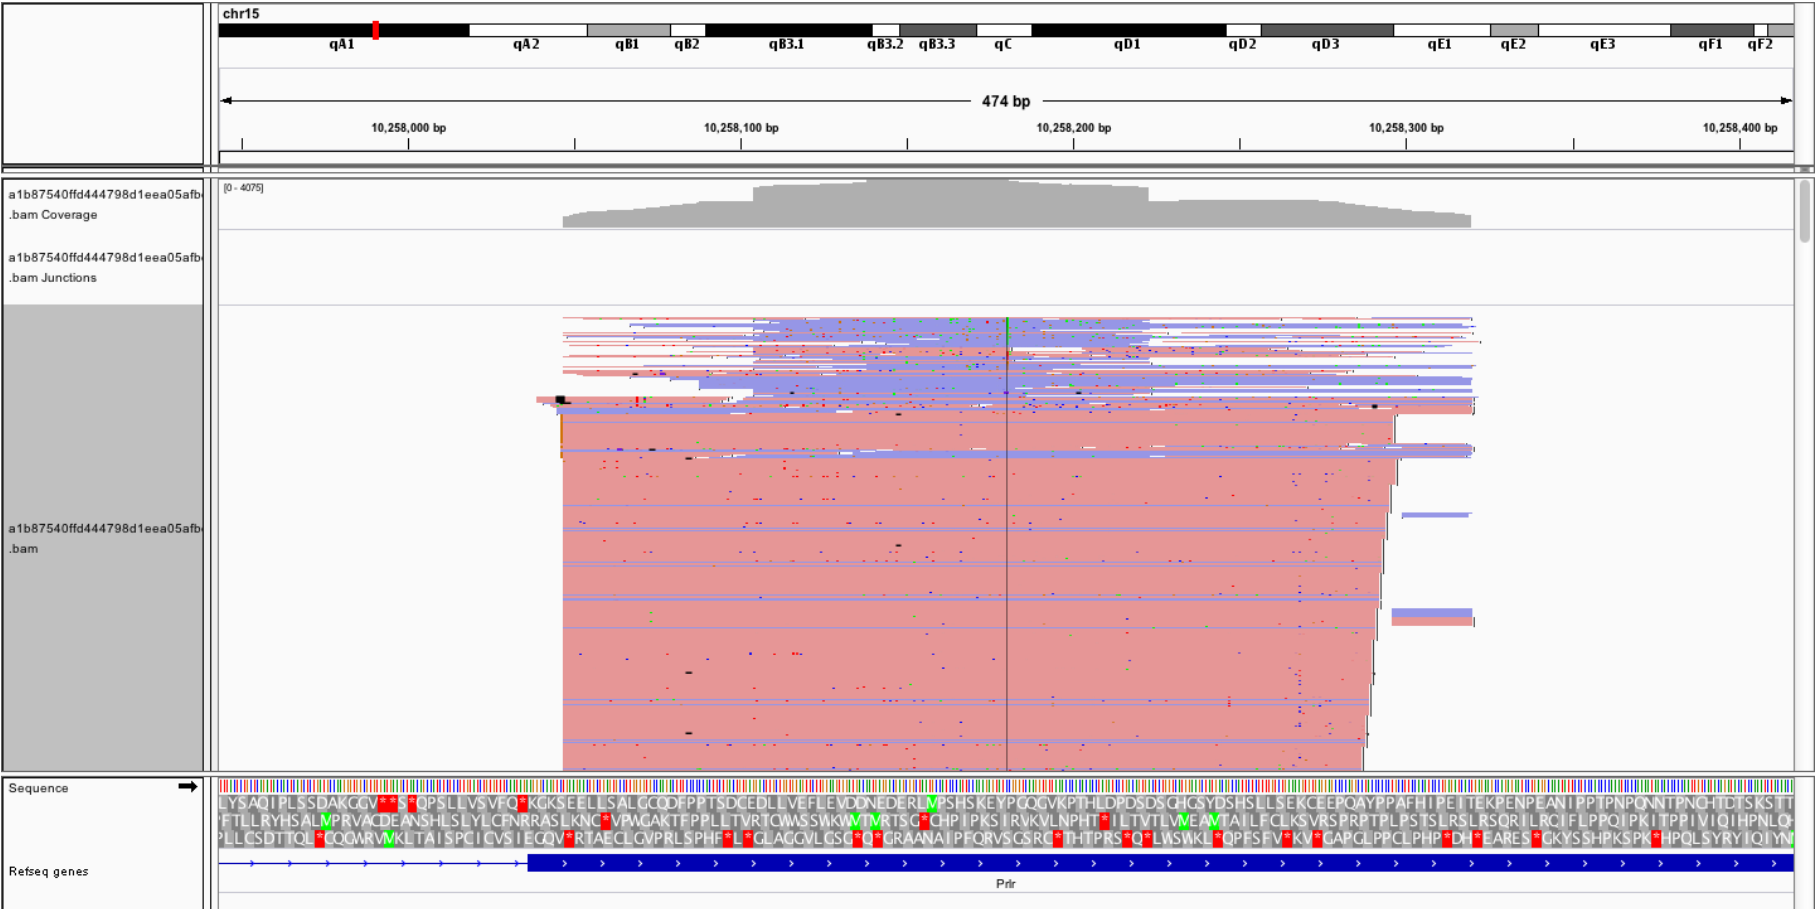

# Sample: TAC299 L. tho.

| Chromosome | start    | stop     | reference | variant |
|------------|----------|----------|-----------|---------|
| 15         | 10258222 | 10258223 | -         | A       |

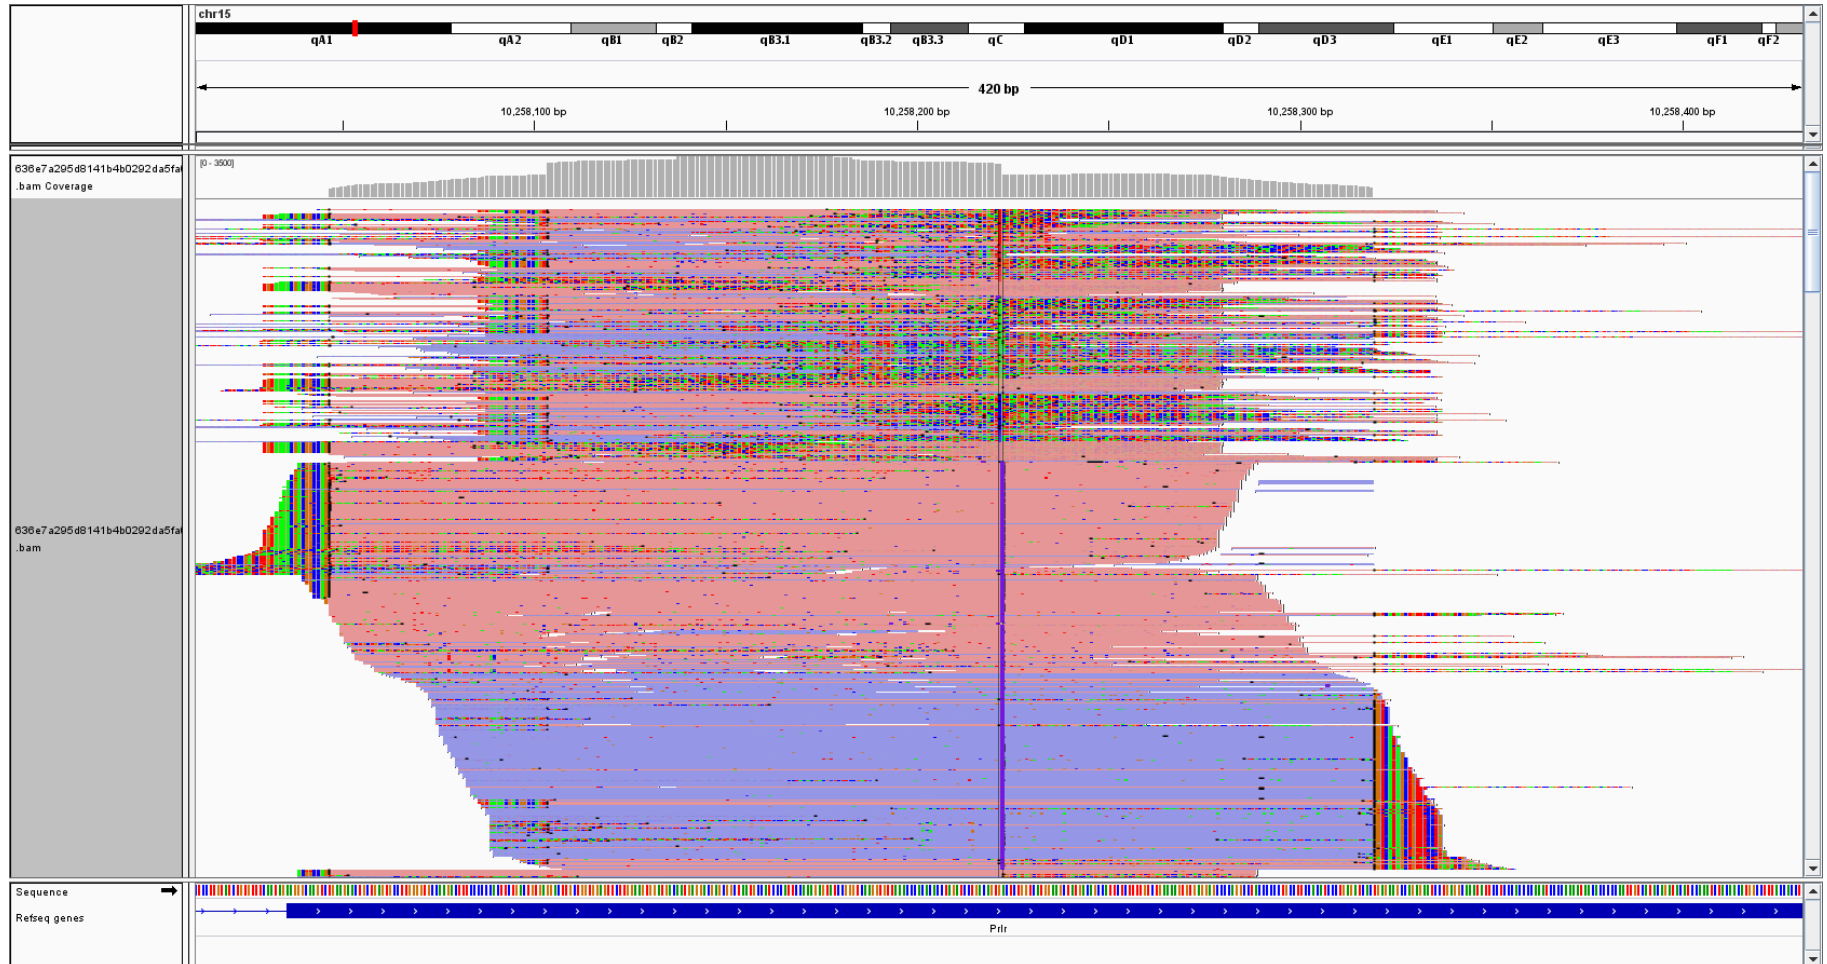

# Sample: TAC312 L. tho.

| Chromosome | start    | stop     | reference               | variant |
|------------|----------|----------|-------------------------|---------|
| 15         | 10258151 | 10258173 | GGCTAATGCCATCCCATTCCAAA | -       |

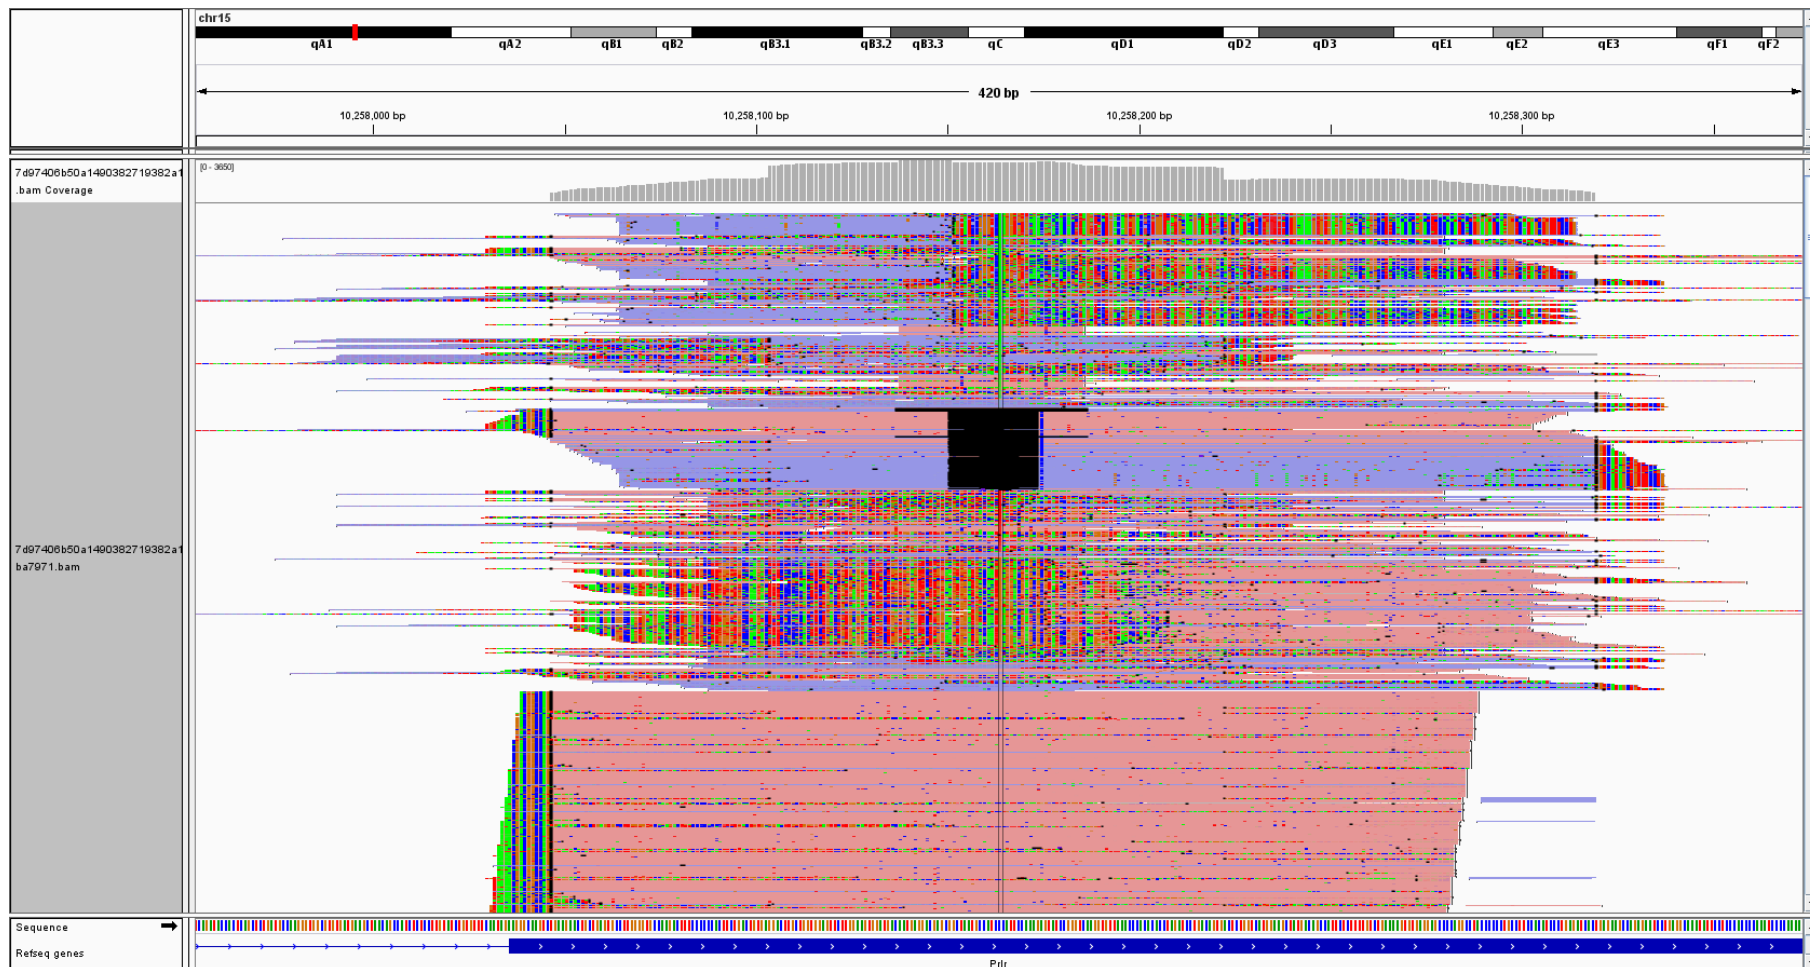

# Sample: TAC314 L. tho.

| Chromosome | start    | stop     | reference | variant |
|------------|----------|----------|-----------|---------|
| 15         | 10258177 | 10258177 | T         | -       |

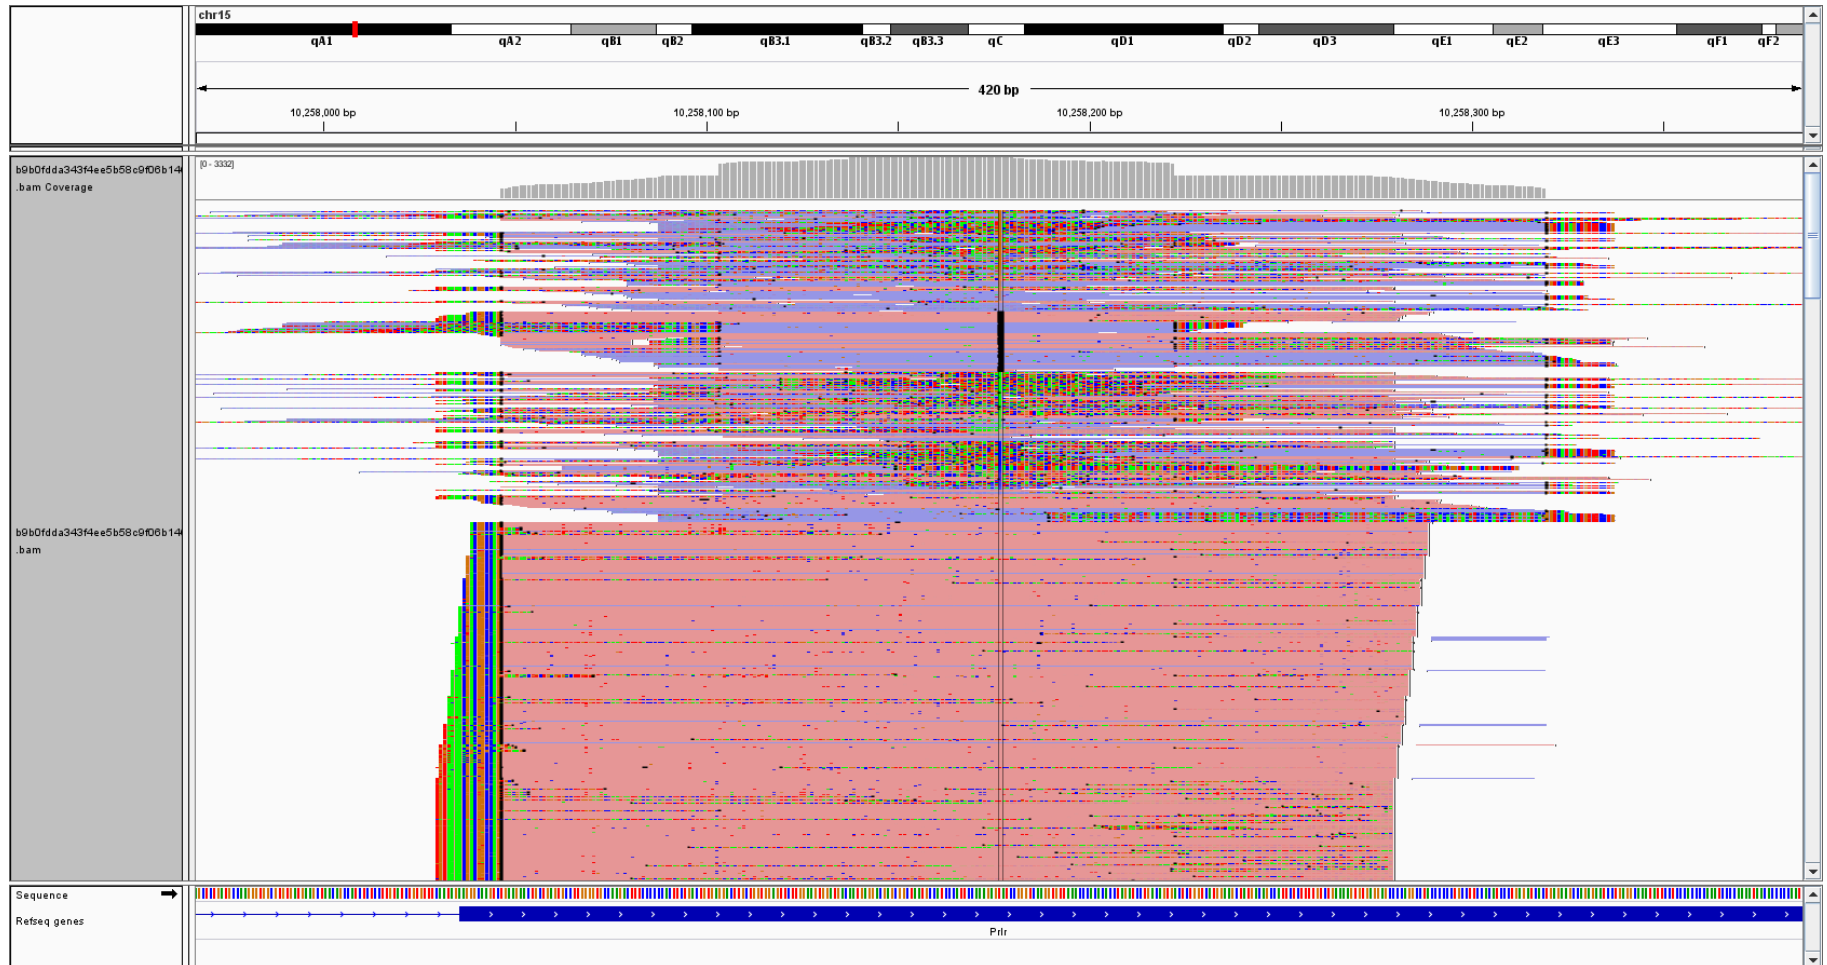

# Sample: TAC319 L. ing.

| Chromosome | start    | stop     | reference               | variant |
|------------|----------|----------|-------------------------|---------|
| 15         | 10258151 | 10258173 | GGCTAATGCCATCCCATTCCAAA | -       |

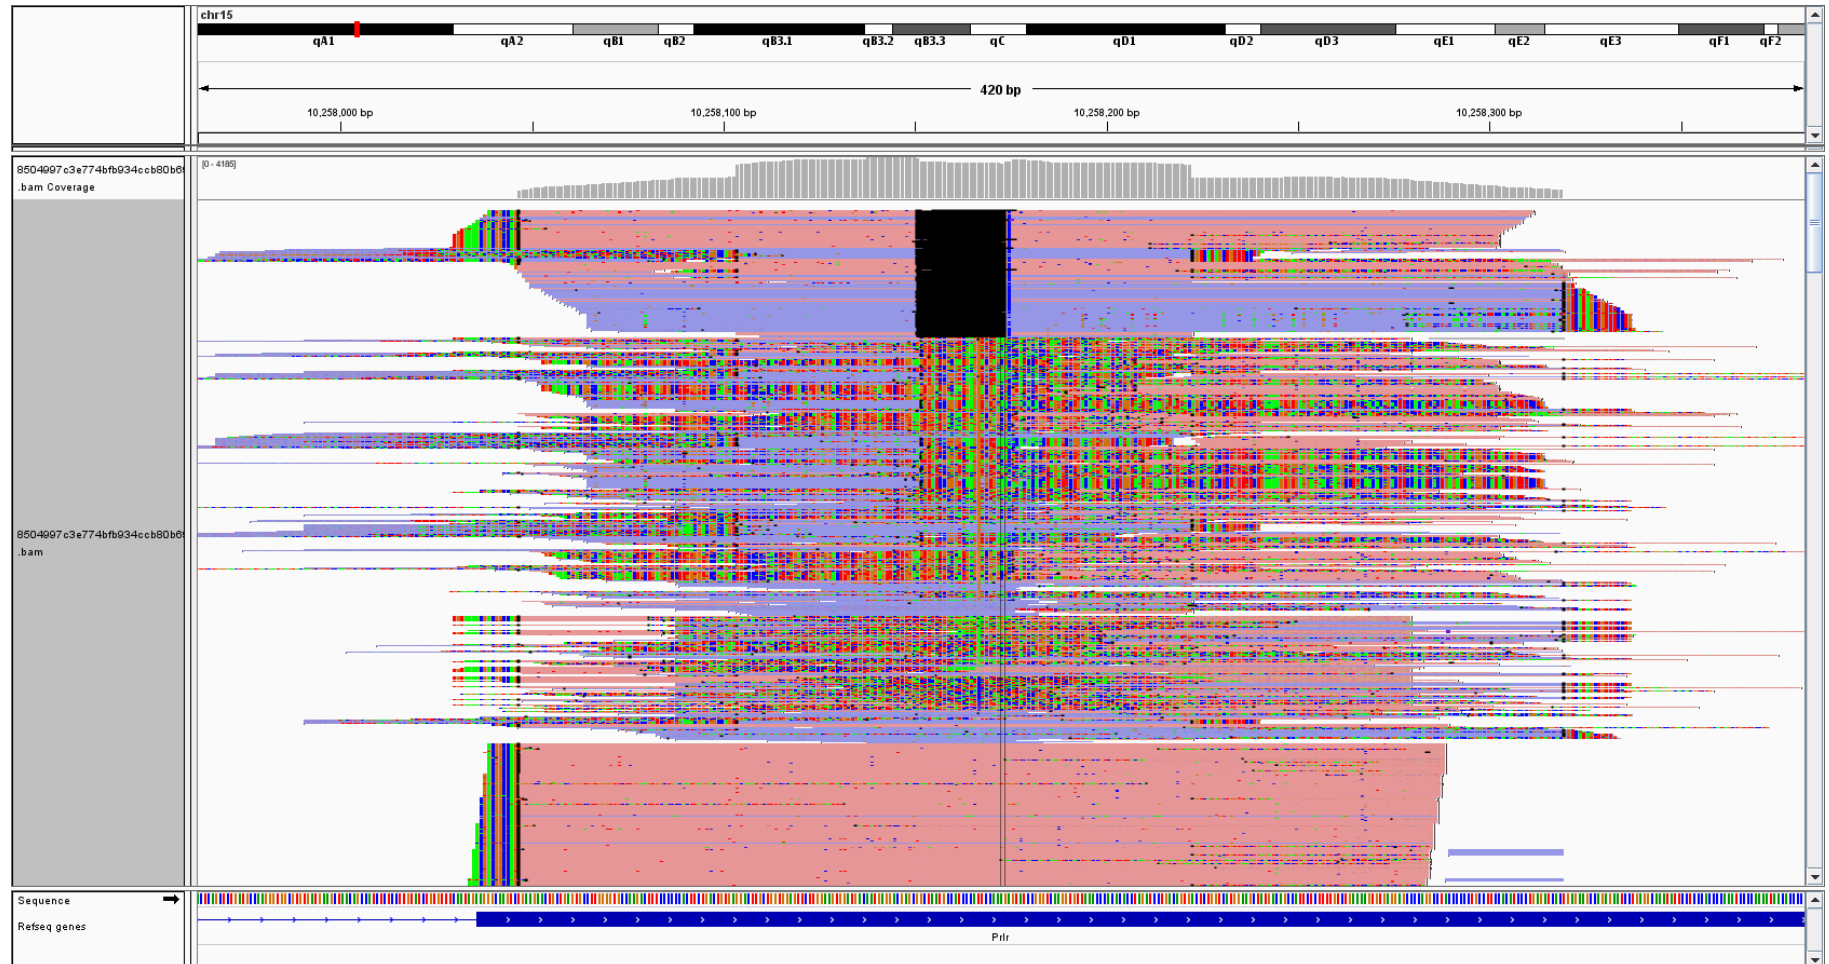



# Sample: TAC319 R. ing.

| Chromosome | start    | stop     | reference | variant |
|------------|----------|----------|-----------|---------|
| 15         | 10258147 | 10258147 | G         | -       |

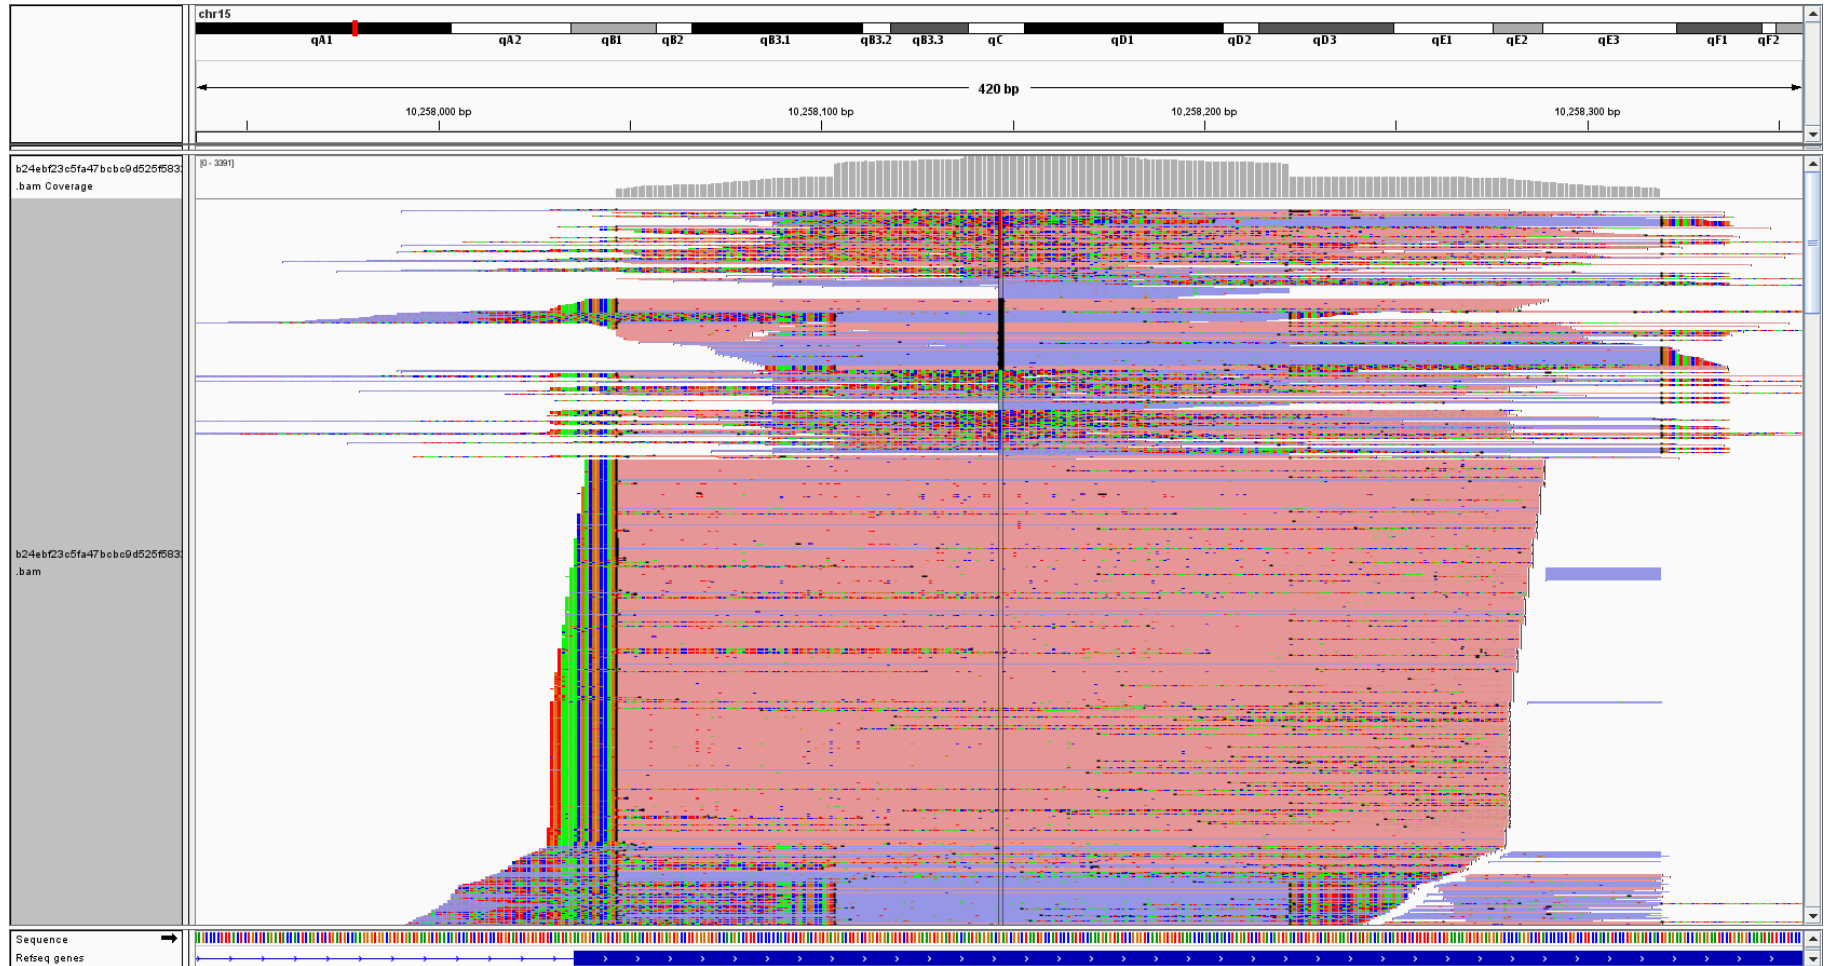

# Sample: TAC321 L. tho.

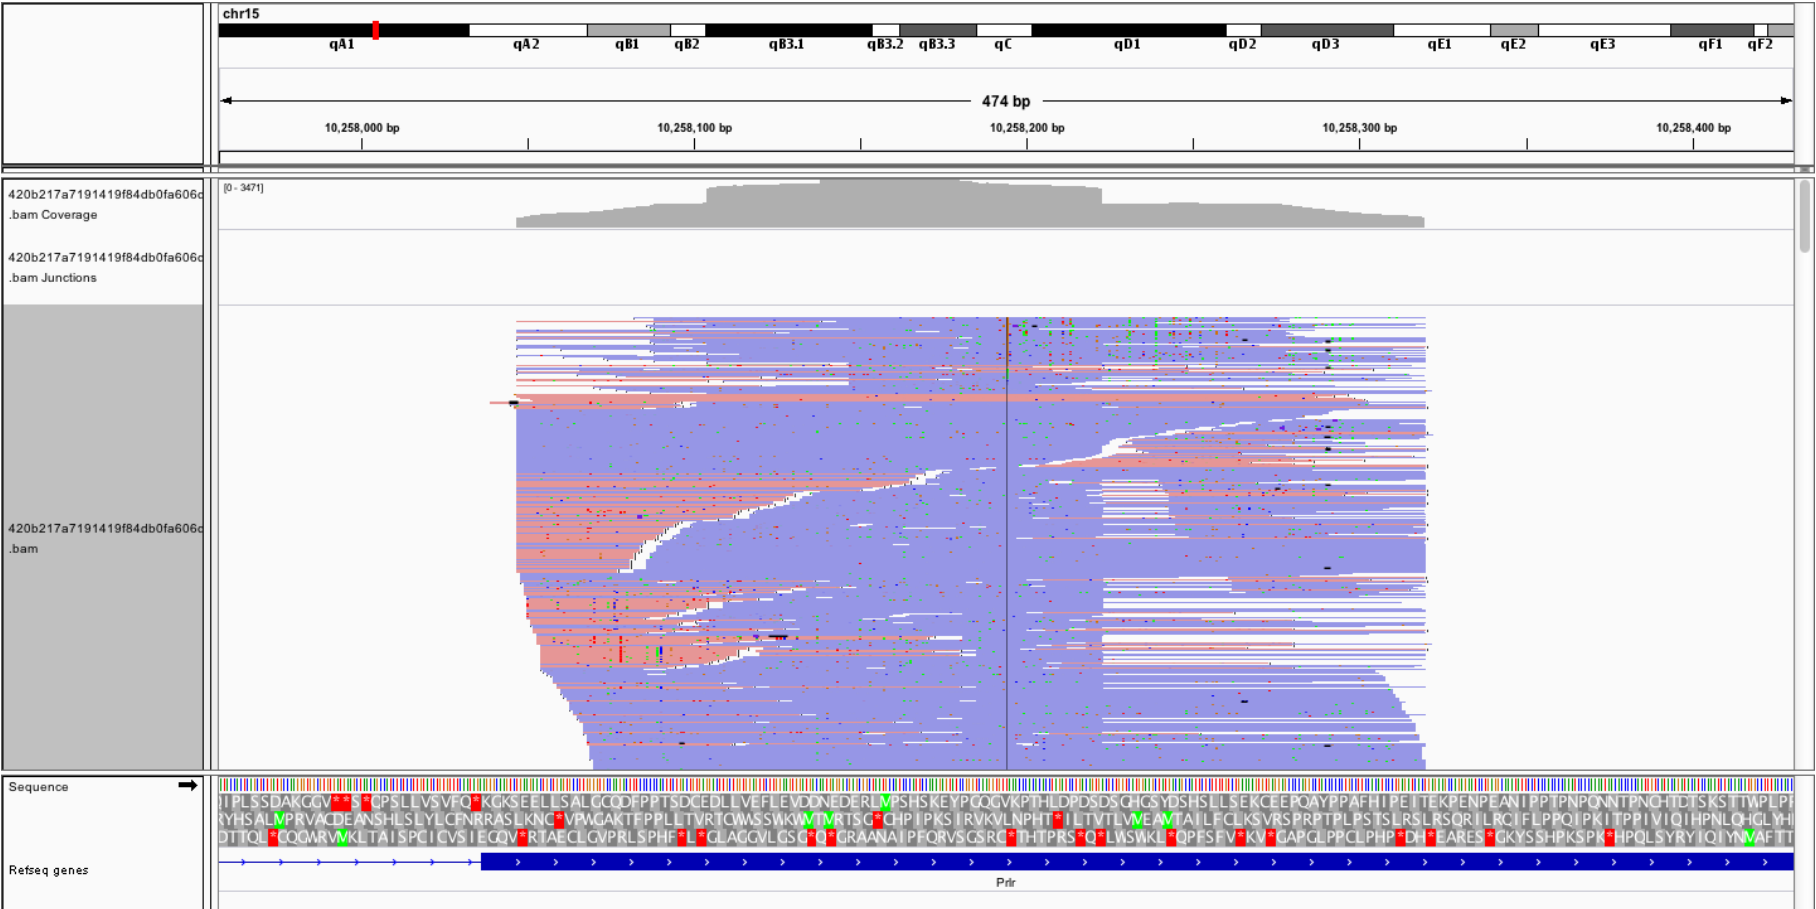

# Sample: TAC322 L. tho.

| Chromosome | start    | stop     | reference                             | variant |
|------------|----------|----------|---------------------------------------|---------|
| 15         | 10258154 | 10258191 | TAATGCCATCCCATTCCAAGAGTATCCGGGTCAAGGT | -       |

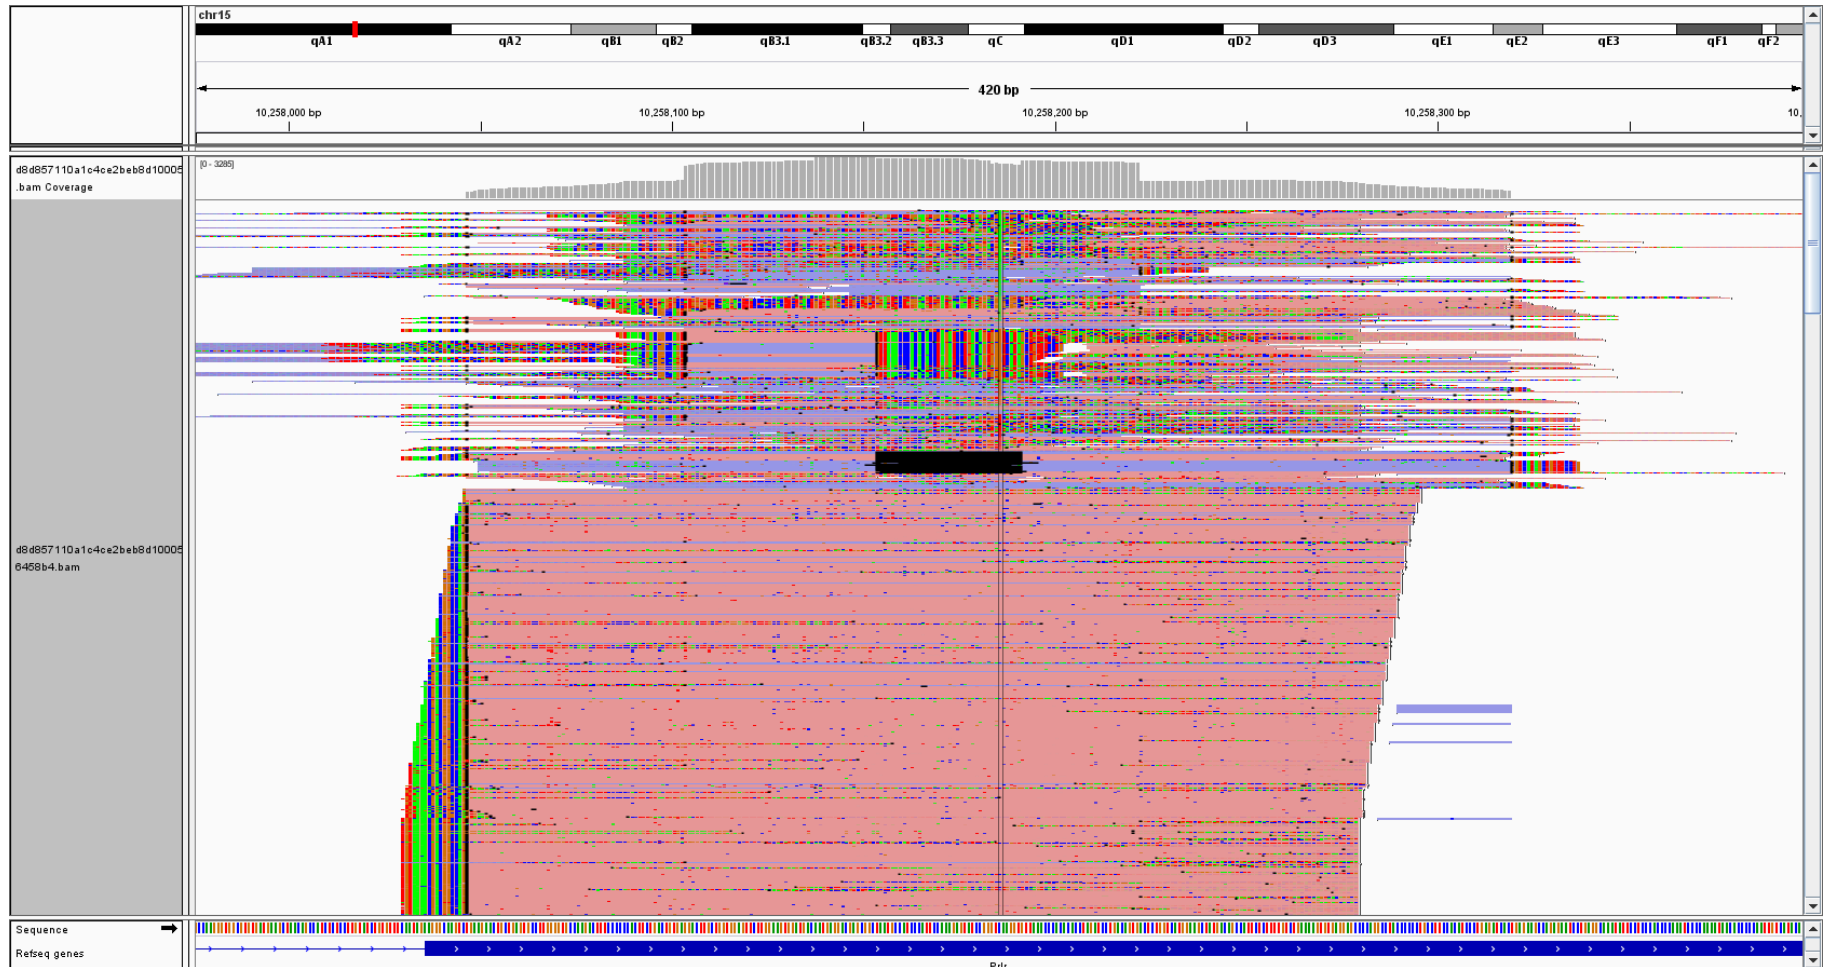

# Sample: TAC323 L. tho.

| Chromosome | start    | stop     | reference | variant |
|------------|----------|----------|-----------|---------|
| 15         | 10258147 | 10258147 | G         | -       |

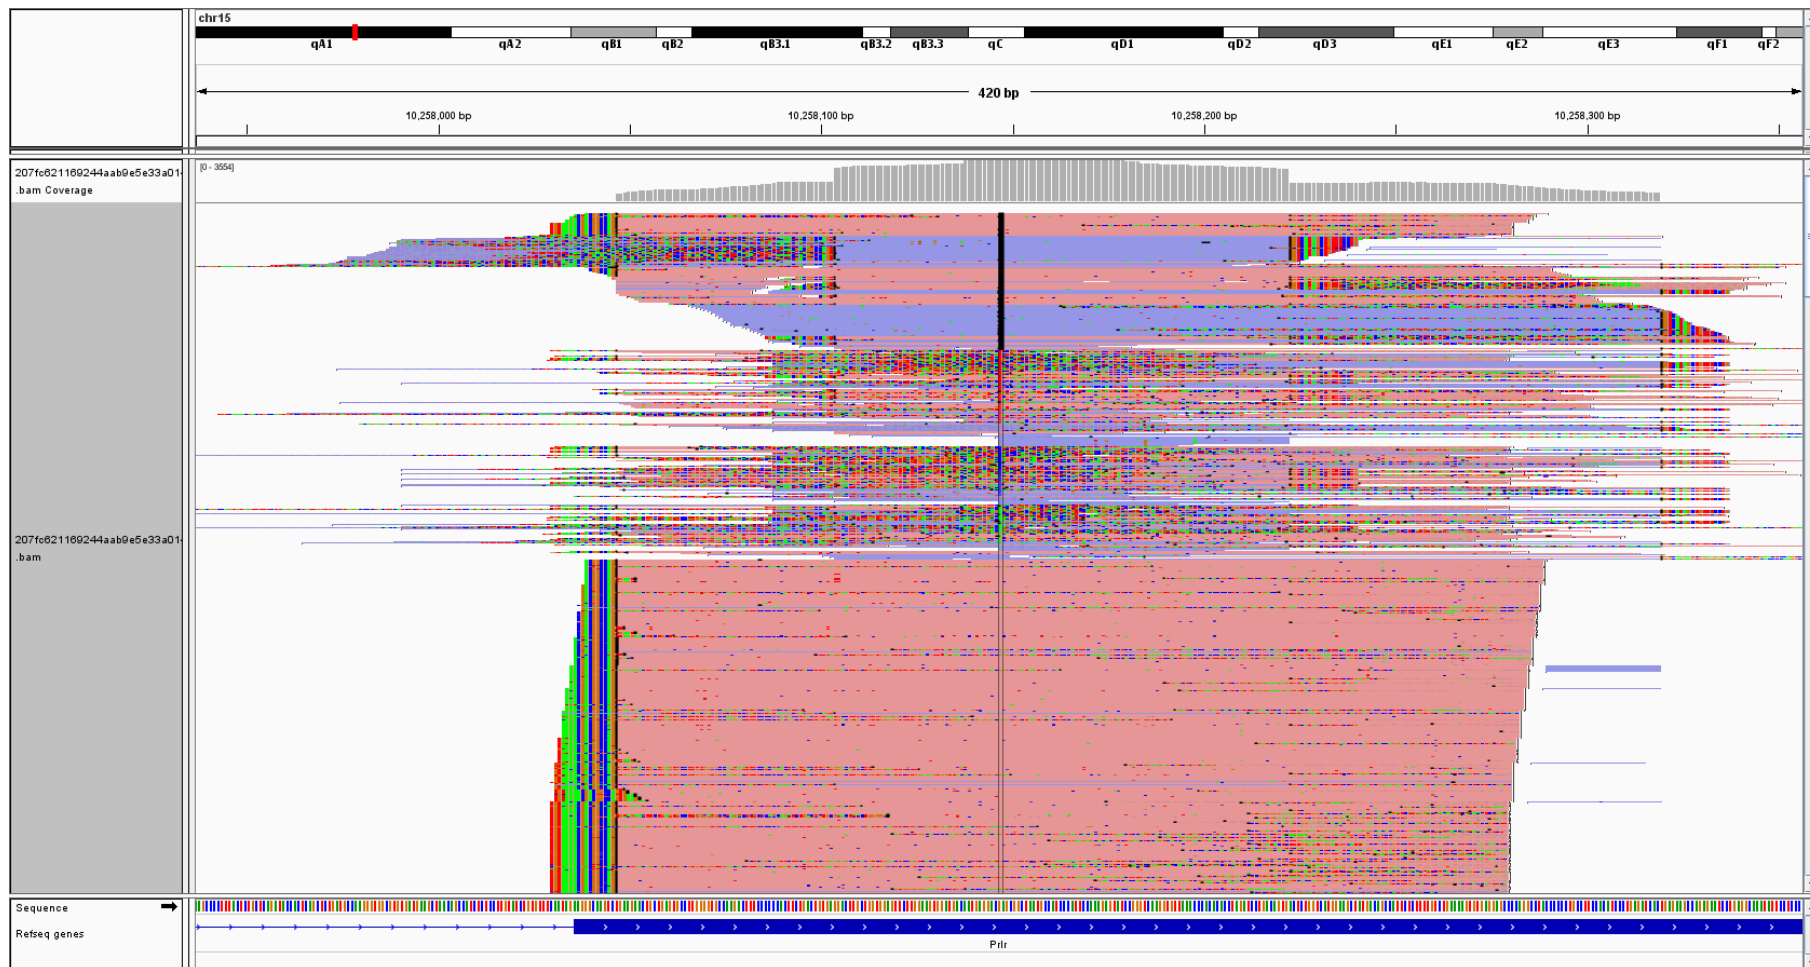

# Summary of mutations

| Chr | start    | stop     | reference                                  | variant | type | Sample          | amino_acid_c<br>hange         | Total   | Var   | VAF    |
|-----|----------|----------|--------------------------------------------|---------|------|-----------------|-------------------------------|---------|-------|--------|
| 15  | 10258178 | 10258186 | ATCCGGGTC                                  | -       | DEL  | TAC246 R. ing.  | p.YPGQGVK328<br>in_frame_del* | 668932  | 622   | 0.0009 |
| 15  | 10258147 | 10258147 | G                                          | -       | DEL  | TAC247 L. cerv. | p.E318fs                      | 944855  | 5290  | 0.0056 |
| 15  | 10258153 | 10258168 | CTAATGCCATCCCATT                           | -       | DEL  | TAC247 L. cerv. | p.L320fs                      | 779295  | 950   | 0.0012 |
| 15  | 10258222 | 10258223 | -                                          | A       | INS  | TAC299 L. tho.  | p.D343fs                      | 790311  | 30973 | 0.0392 |
| 15  | 10258151 | 10258173 | GGCTAATGCCATCCCATTCC<br>AAA                | -       | DEL  | TAC312 L. tho.  | p.L320fs                      | 950079  | 2531  | 0.0027 |
| 15  | 10258177 | 10258177 | T                                          | -       | DEL  | TAC314 L. tho.  | p.Y328fs                      | 826462  | 1019  | 0.0012 |
| 15  | 10258151 | 10258173 | GGCTAATGCCATCCCATTCC<br>AAA                | -       | DEL  | TAC319 L. ing.  | p.L320fs                      | 1094462 | 3401  | 0.0031 |
| 15  | 10258147 | 10258147 | G                                          | -       | DEL  | TAC319 R. ing.  | p.E318fs                      | 933280  | 1547  | 0.0017 |
| 15  | 10258154 | 10258191 | TAATGCCATCCCATTCCAAA<br>GAGTATCCGGGTCAAGGT | -       | DEL  | TAC322 L. tho.  | p.L320fs                      | 896478  | 346   | 0.0004 |
| 15  | 10258147 | 10258147 | G                                          | -       | DEL  | TAC323 L. tho.  | p.E318fs                      | 907500  | 6565  | 0.0072 |

Samples lacking mutations: TAC297 R. tho. and TAC321 L. tho.
