# Supplementary material
Source: PubMed Central journal article supplement (PMC5557050)
Supplement: NIHMS814284-supplement-Supplemental_Materials.pdf [file NIHMS814284-supplement-Supplemental_Materials.pdf]

# Truncating Prolactin Receptor Mutations Promote Tumor Growth in Murine Estrogen Receptor-Alpha Mammary Carcinomas

**Short title: Prlr truncation promotes tumor growth in *Stat1*<sup>-/-</sup> mice**

Obi L. Griffith<sup>1,2,3,9</sup>, Szeman Ruby Chan<sup>4,8,9</sup>, Malachi Griffith<sup>1,3,5</sup>, Kilannin Krysiak<sup>1</sup>, Zachary L. Skidmore<sup>1</sup>, Jasreet Hundal<sup>1</sup>, Julie A. Allen<sup>4</sup>, Cora D. Arthur<sup>4</sup>, Daniele Runci<sup>4</sup>, Mattia Bugatti<sup>7</sup>, Alexander P. Miceli<sup>4</sup>, Heather Schmidt<sup>1</sup>, Lee Trani<sup>1</sup>, Krishna-Latha Kanchi<sup>1</sup>, Christopher A. Miller<sup>1,2</sup>, David E. Larson<sup>1,5</sup>, Robert S. Fulton<sup>1,5</sup>, William Vermi<sup>4,7</sup>, Richard K. Wilson<sup>1,2,3,5</sup>, Robert D. Schreiber<sup>4,6,10,\*</sup>, Elaine R. Mardis<sup>1,2,3,5,\*</sup>

1. McDonnell Genome Institute, Washington University School of Medicine, 4444 Forest Park Ave, St. Louis, MO, 63108, USA.
2. Department of Medicine, Washington University School of Medicine, 660 S Euclid Ave, St. Louis, MO, 63110, USA.
3. Siteman Cancer Center, Washington University School of Medicine, 4921 Parkview Pl, St. Louis, MO, 63110, USA.
4. Department of Pathology and Immunology, Washington University School of Medicine, 660 S Euclid Ave, St. Louis, MO, 63110, USA.
5. Department of Genetics, Washington University School of Medicine, 660 S Euclid Ave, St. Louis, MO, 63110, USA.
6. Center for Human Immunology and Immunotherapy Programs, Washington University School of Medicine, 425 S Euclid Ave, St. Louis, MO, 63110, USA.
7. Department of Molecular and Translational Medicine, Section of Pathology, School of Medicine, University of Brescia, Piazza del Mercato, 15, 25121 Brescia BS, Italy.
8. Present address: Janssen Research & Development, Johnson and Johnson, 1400 McKean Rd, Spring House, PA 19477, USA.
9. Co-first author
10. Lead contact

\* Correspondence: [schreiber@immunology.wustl.edu](mailto:schreiber@immunology.wustl.edu) (R.D.S), [emardis@wustl.edu](mailto:emardis@wustl.edu) (E.R.M)

## Supplemental Experimental Procedures

### *Whole Genome Sequencing*

The yield and integrity of native genomic DNA was verified by a PicoGreen assay to determine mass (Invitrogen, Carlsbad, CA). Small insert dual indexed Illumina paired end libraries were constructed with the KAPA LTP sample prep kits according to the manufacturer's recommendations (KAPA Biosystems, Woburn, MA) with a few exceptions: (1) 100-500 ng of gDNA was fragmented using a Covaris E220 DNA Sonicator (Covaris, Woburn, MA) within a size range between 200-600 bp using the following settings: volume = 50  $\mu$ L, temperature = 4  $^{\circ}$ C, duty cycle = 5, intensity = 4, cycle burst = 200, time = 90 seconds. (2) To prevent excessive over-amplification during PCR, cycle optimization was performed. 2  $\mu$ L of the library was cycled as follows: 98  $^{\circ}$ C for 30 seconds, cycle – 98  $^{\circ}$ C for 10 seconds, 65  $^{\circ}$ C for 30 seconds, and 72 $^{\circ}$ C for 30 seconds. After cycles 6, 8, 10, and 12 the program was halted and a 5  $\mu$ L aliquot was collected. Each cycle amplification product was evaluated on a 2.2% agarose Flash Gel (Lonza Group, Basel, Switzerland) and the optimum cycle number determined. (3) Eight PCR reactions were amplified at the determined cycle number to enrich for proper adaptor ligated fragments. Libraries were fractionated on the LabChip XT using the DNA 750 chip (Perkin Elmer, Hopkinton, MA) collecting three unique fractions: 375 bp, 475 bp, and 675 bp with a +/- 5% covariance. Each fraction/library was assessed for concentration and size to determine molarity using the Qubit Fluorometer Quant-iT dsDNA HS assay (Life Technologies, Carlsbad, CA) and the Agilent BioAnalyzer High Sensitivity DNA Assay (Agilent Technologies, Santa Clara, CA), respectively. The concentration of each library fraction was verified through qPCR according to the manufacturer's protocol (Kapa Biosystems, Woburn, MA) to produce cluster counts appropriate for the Illumina HiSeq2000 platform. Each genome was loaded on HiSeq2000 version 3 flow cell according to the manufacturer's recommendations (Illumina, San Diego, CA). 2 X 101 bp read pairs were generated for each sample, yielding an average of 37.1x sequence coverage for the tumor genomes and 27.2x sequence coverage for the normal genomes (**Table S8**). The reference-aligned whole genome sequence data and sample details for 52 tumor and non-tumor mouse tissues have been submitted to NCBI SRA study SRP061941, BioProject PRJNA248457.

### *Reference alignment and somatic variant detection*

Specifically, 'Reference Alignment' and 'Somatic Variation' analysis pipelines were used to identify somatic single nucleotide variants (SNVs), small insertions and deletions (indels), and copy number alterations (CNVs). Alignment was performed by BWA (v0.5.9) (Li and Durbin, 2009) against the mouse reference genome (mm9). Duplicates were marked by Picard Mark Duplicates (v1.46) [<http://broadinstitute.github.io/picard/>]. SNV calls were identified as the unique union of SamTools (version r963) (Li et al., 2009), Sniper (version 1.0.2) (Larson et al., 2012), VarScan (version 2.2.6) (Koboldt et al., 2012), and Strelka (version 0.4.6.2) (Saunders et al., 2012). Small insertion and deletion (indel) calls were identified as the unique union of GATK (1.0.5336) (McKenna et al., 2010), Pindel (version 0.5) (Ye et al., 2009), VarScan and Strelka. Copy number variants (CNVs) were called with CopyCat (<https://github.com/chrisamiller/copycat>). Annotation was performed by our custom annotator against Ensembl (version 67).

### *Validation and Extension Sequencing of Prlr by Sanger and MiSeq*

Based on the region in which truncating *Prlr* mutations were observed in the discovery set (chr15:10258139-10258195; mm9) two sets of primers were designed to encompass this region with approximately 50 or 100 bp additional flanking sequence on each side, respectively. Primers

were designed using an in-house primer design graphical user interface (GUI) that does the following: (1) performs repeat and SNP masking; (2) reduces the amplicon size based on increasing GC-content; (3) blasts primers to verify a single unique genomic product (see **Table S10** for primer details). Primers were tailed (p1k / m13 reverse) for 3730 sequencing and ordered from Integrated DNA Technologies (IDT, Coralville, IA). Once received, primers were resuspended in 1X TE buffer. PCR reactions consisted of 5 ng DNA input, 6.25  $\mu$ L of pooled and tailed primer pairs at 1.2  $\mu$ M, and 6.25  $\mu$ L of Kapa HiFi HotStart ReadyMix 2X (Kapa Biosystems, Wilmington, MA) at 2.5 mM. Amplification was performed in a Bio-Rad thermocycler (Bio-Rad Laboratories, Inc., Hercules, CA) with an initial denaturation (3 minutes at 95  $^{\circ}$ C) followed by 30 cycles of denaturation (20 seconds at 98  $^{\circ}$ C), primer annealing (15 seconds at 65  $^{\circ}$ C), extension (60 seconds at 72  $^{\circ}$ C) and then a final extension (60 seconds, 72  $^{\circ}$ C). After amplification, we removed reaction by-products using a 1.5:1.0 Ampure bead-to-sample ratio. A Lonza flash gel was run to confirm product. Two sequencing reactions were completed using a 2  $\mu$ L DNA input, BigDye<sup>®</sup> (Life Technologies), and either the forward or reverse universal primer for each amplicon. Once complete, the sequencing reaction was precipitated using sodium acetate followed by a 70% ethanol wash (3 M NaOAc at 1/10th volume for a 300 mM final concentration and 2.5X volumes of EtOH). The DNA was dried down and then resuspended in EDTA and loaded on a 3730 DNA analyzer (Life Technologies). Bases were called from sequence trace files using phred and then assembled against a reference scaffold of the amplicon sequence using phrap (Ewing and Green, 1998; Ewing et al., 1998). Sequence variants were identified by manual review of assemblies and sequence traces in Consed (Gordon et al., 1998). We performed Sanger sequencing as described above on the original 22 tumor samples to validate *Prlr* variants that were called from WGS data and to extend the *Prlr* findings to 10 additional tumors and 35 non-tumor samples (**Figure 1 and Figure S2**). For two tumors in the original discovery set, additional FFPE samples were obtained, and sequenced on a MiSeq Illumina instrument using products of the same PCR protocol described above. Finally we sequenced an additional 9 FFPE samples by MiSeq, to evaluate the presence of *Prlr* mutations in DCIS tissues.

## References

- Boutin, J. M., Edery, M., Shirota, M., Jolicoeur, C., Lesueur, L., Ali, S., Gould, D., Djiane, J., and Kelly, P. A. (1989). Identification of a cDNA encoding a long form of prolactin receptor in human hepatoma and breast cancer cells. *Molecular endocrinology* 3, 1455-1461.
- Ewing, B., and Green, P. (1998). Base-calling of automated sequencer traces using phred. II. Error probabilities. *Genome research* 8, 186-194.
- Ewing, B., Hillier, L., Wendl, M. C., and Green, P. (1998). Base-calling of automated sequencer traces using phred. I. Accuracy assessment. *Genome research* 8, 175-185.
- Gordon, D., Abajian, C., and Green, P. (1998). Consed: a graphical tool for sequence finishing. *Genome research* 8, 195-202.
- Hu, Z. Z., Meng, J., and Dufau, M. L. (2001). Isolation and characterization of two novel forms of the human prolactin receptor generated by alternative splicing of a newly identified exon 11. *The Journal of biological chemistry* 276, 41086-41094.
- Kline, J. B., Roehrs, H., and Clevenger, C. V. (1999). Functional characterization of the intermediate isoform of the human prolactin receptor. *The Journal of biological chemistry* 274, 35461-35468.
- Kline, J. B., Ryczyn, M. A., and Clevenger, C. V. (2002). Characterization of a novel and functional human prolactin receptor isoform (deltaS1PRLr) containing only one extracellular fibronectin-like domain. *Molecular endocrinology* 16, 2310-2322.
- Koboldt, D. C., Zhang, Q., Larson, D. E., Shen, D., McLellan, M. D., Lin, L., Miller, C. A., Mardis, E. R., Ding, L., and Wilson, R. K. (2012). VarScan 2: somatic mutation and copy number alteration discovery in cancer by exome sequencing. *Genome research* 22, 568-576.
- Larson, D. E., Harris, C. C., Chen, K., Koboldt, D. C., Abbott, T. E., Dooling, D. J., Ley, T. J., Mardis, E. R., Wilson, R. K., and Ding, L. (2012). SomaticSniper: identification of somatic point mutations in whole genome sequencing data. *Bioinformatics* 28, 311-317.
- Li, H., and Durbin, R. (2009). Fast and accurate short read alignment with Burrows-Wheeler transform. *Bioinformatics* 25, 1754-1760.
- Li, H., Handsaker, B., Wysoker, A., Fennell, T., Ruan, J., Homer, N., Marth, G., Abecasis, G., Durbin, R., and Genome Project Data Processing, S. (2009). The Sequence Alignment/Map format and SAMtools. *Bioinformatics* 25, 2078-2079.
- McKenna, A., Hanna, M., Banks, E., Sivachenko, A., Cibulskis, K., Kernytsky, A., Garimella, K., Altshuler, D., Gabriel, S., Daly, M., and DePristo, M. A. (2010). The Genome Analysis Toolkit: a MapReduce framework for analyzing next-generation DNA sequencing data. *Genome research* 20, 1297-1303.
- Saunders, C. T., Wong, W. S., Swamy, S., Becq, J., Murray, L. J., and Cheetham, R. K. (2012). Strelka: accurate somatic small-variant calling from sequenced tumor-normal sample pairs. *Bioinformatics* 28, 1811-1817.
- Trott, J. F., Hovey, R. C., Koduri, S., and Vonderhaar, B. K. (2003). Alternative splicing to exon 11 of human prolactin receptor gene results in multiple isoforms including a secreted prolactin-binding protein. *Journal of molecular endocrinology* 30, 31-47.
- Ye, K., Schulz, M. H., Long, Q., Apweiler, R., and Ning, Z. (2009). Pindel: a pattern growth approach to detect break points of large deletions and medium sized insertions from paired-end short reads. *Bioinformatics* 25, 2865-2871.

## Supplemental Figures

### Figure S1. Comparison of recurrent mutations in *Stat1*<sup>-/-</sup> mouse tumors and human TCGA luminal breast cancers. Related to Table 1, Results and Experimental Procedures.

Non-synonymous and RNA Mutations were compared between 699 TCGA luminal breast cancer samples and 22 whole genome sequenced *Stat1*<sup>-/-</sup> mouse tumor samples. Genes were mapped between species using biomaRt. Genes without a 1 to 1 mapping between *H.sapiens* and *M.musculus* were removed. (A) Genes displayed are recurrent in > 5% (35/699) of TCGA samples or > 13.6% (3/22) samples in the mouse cohort. Mutation types for the human dataset are indicated by color, displaying only the most deleterious mutation (following the order of the legend) per sample. The percent of samples with a mutation are displayed for the TCGA (blue bars) and mouse cohorts (red bars). (B) A Venn diagram displays the number of genes mapped between species with a mutation in any *Stat1*<sup>-/-</sup> mouse and ≥ 7 human (1%) tumor samples.

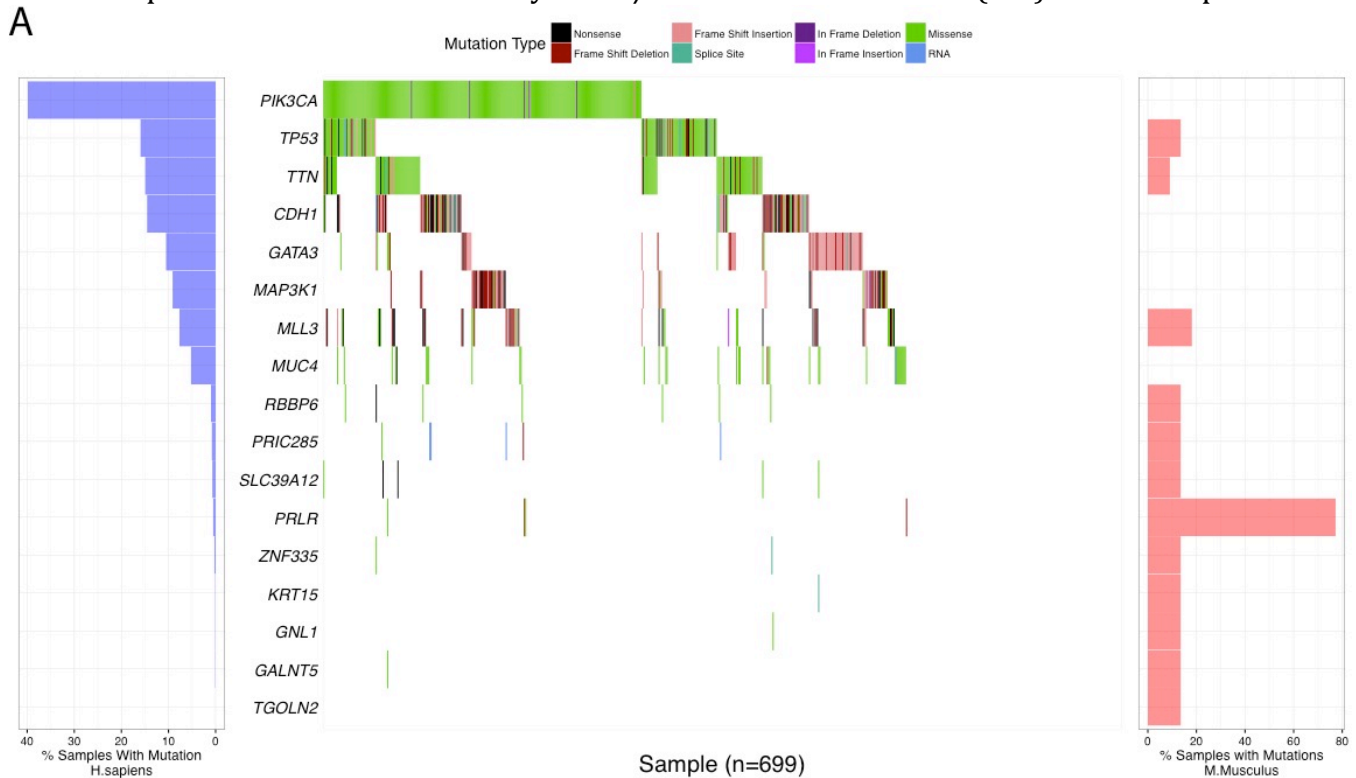

**B**

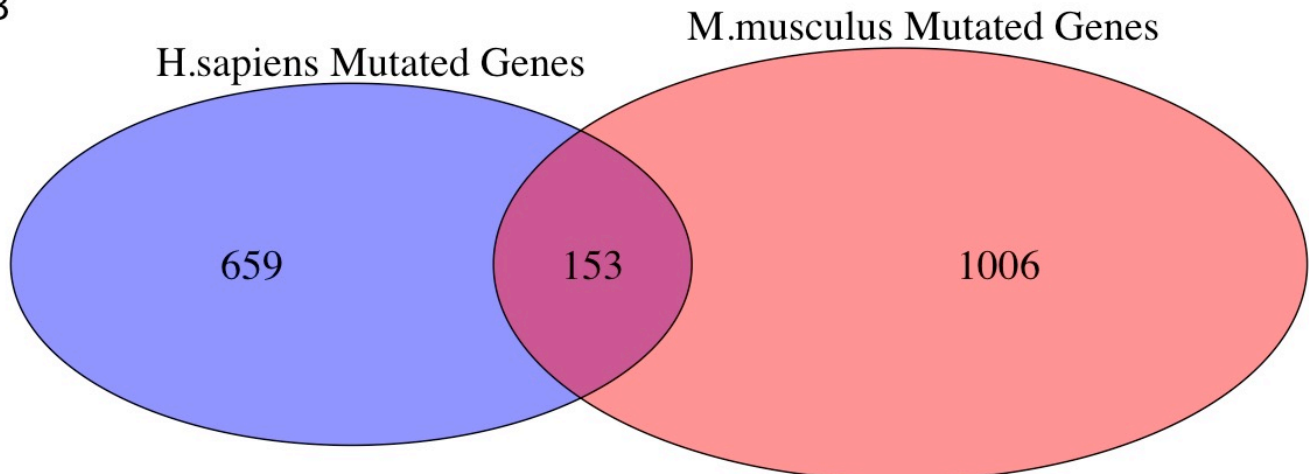

**Figure S2. Summary of work flow in the discovery and validation of recurrent *Prlr* mutations.** Related to **Figure 1, Results and Experimental Procedures.**

Analysis of whole genome sequencing data from discovery samples identified *Prlr* mutations in 21/22 primary *Stat1*<sup>-/-</sup> mammary tumors. Independent MiSeq or Sanger sequencing validated 22/23 *Prlr* mutations in these tumors. Overall, *Prlr* mutations were observed in 22/22 tumors in the discovery cohort with a single tumor harboring 2 *Prlr* mutations. *Prlr* mutation status was evaluated in the extension cohort using MiSeq or Sanger sequencing. Abbreviations: FFPE, formalin-fixed paraffin embedded; DCIS, ductal carcinoma in situ

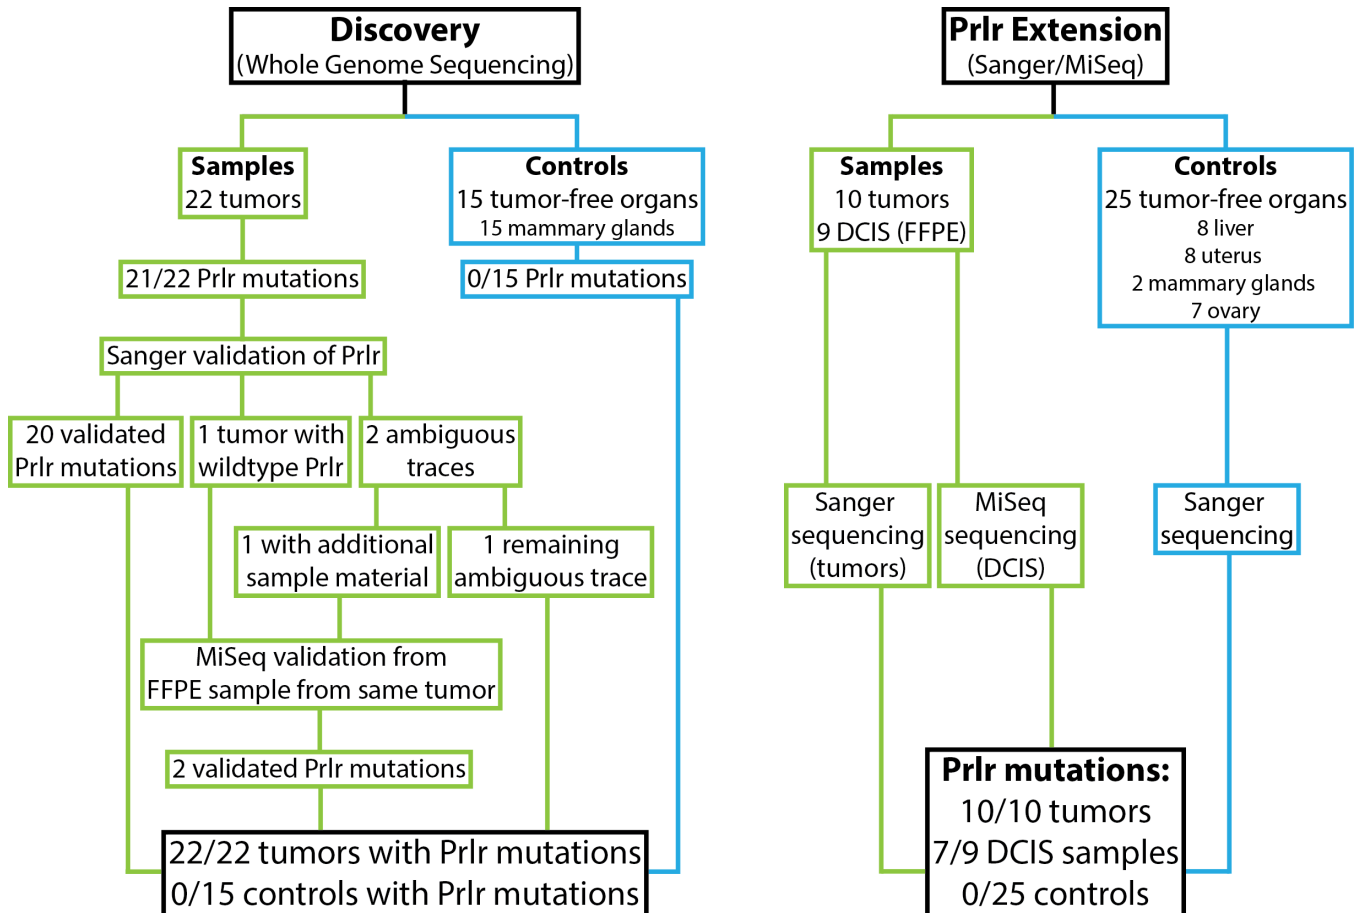

**Figure S3. Activation of Stat3 and Stat5 in DCIS from *Stat1*<sup>-/-</sup> mammary glands. Related to Figure 3 and Results.**

Low (a-c) and high (d-f) power view obtained from sub-serial sections of mammary tissue from *Stat1*<sup>-/-</sup> mice and stained as indicated by labels. Most of the large atypical cells in DCIS displayed pStat3 (b, e) and pStat5 (c, f), as indicated by black arrow heads, whereas no reactivity was observed in normal epithelial cells (indicated by red arrow heads). Magnification 200x (a-c; scale bar 100  $\mu$ m) and 600x (e-f; scale bar 33  $\mu$ m).

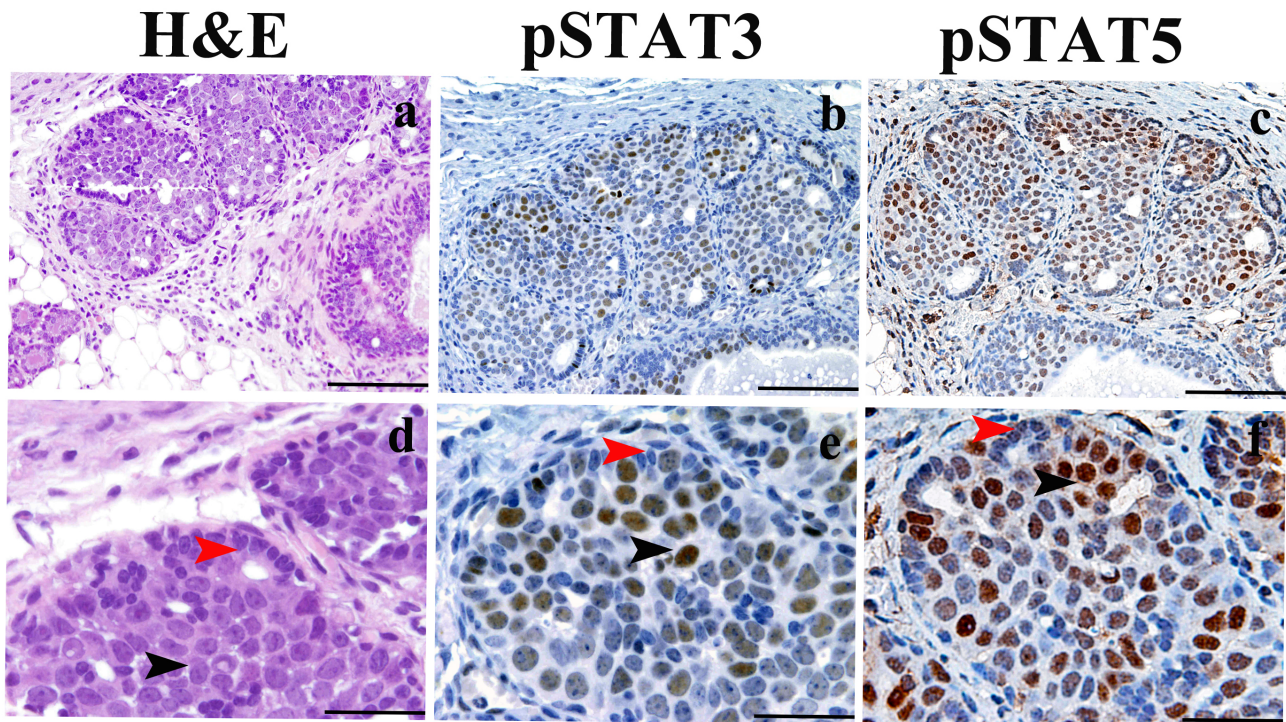

**Figure S4. Predicted protein consequence of nonsense and frameshift mutations in *Prlr* for discovery and extension/validation data.** Related to **Figure 2, Results, Experimental Procedures, and Discussion.**

A clustal omega multiple protein sequence alignment is shown to visualize the effect of *Prlr* truncating mutations. Only residues 301 to 350 of the wild type *Prlr* are shown based on the reference sequence ENSMUST00000124470 (top row). All residues up to amino acid (aa) position 315 are preserved relative to the reference protein sequence. However, starting at position 316, mutated *Prlr* proteins are predicted to have either altered amino acid sequences and premature truncation, resulting in predicted protein sizes of 317 to 349 aa compared to the reference full-length sequence of 608 aa.

|                        |                                                         |     |
|------------------------|---------------------------------------------------------|-----|
| ENSMUST00000124470     | DCEDLLVEFLEVDDNEDE-----RLMPSHSKEYPGQGVKPTHLDPDSDSGHGSYD | 350 |
| TAC302_R_cerv_E316fs   | DCEDLLVEFLEVDDN-----AANAIPFQRVSGSRC*-----               | 330 |
| TAC322_L_tho_L320fs    | DCEDLLVEFLEVDDNEDE-----RR*-----                         | 320 |
| TAC247_L_cerv_L320fs   | DCEDLLVEFLEVDDNEDE-----RPKSIRVKVL-----NPHT*-----        | 332 |
| OVX3L2_R_tho_L320fs    | DCEDLLVEFLEVDDNEDE-----R*-----                          | 319 |
| OVX6R2_L_cerv_L320fs   | DCEDLLVEFLEVDDNEDE-----R*-----                          | 319 |
| TAC314_L_tho_Y328fs    | DCEDLLVEFLEVDDNEDE-----RLMPSHSKEIRVKVLNPHT*-----        | 337 |
| B3R15_L_tho_G330fs     | DCEDLLVEFLEVDDNEDE-----RLMPSHSKEYPVKVLNPHT*-----        | 337 |
| TAC266_L_tho_G330fs    | DCEDLLVEFLEVDDNEDE-----RLMPSHSKEYPVKVLNPHT*-----        | 337 |
| OVX13R1R2_L_ing_G330fs | DCEDLLVEFLEVDDNEDE-----RLMPSHSKEYPVKVLNPHT*-----        | 337 |
| TAC311_L_cerv_G330fs   | DCEDLLVEFLEVDDNEDE-----RLMPSHSKEYPVKVLNPHT*-----        | 337 |
| B3R1R2L1_R_tho_P329fs  | DCEDLLVEFLEVDDNEDE-----RLMPSHSKEYRVKVLNPHT*-----        | 337 |
| TAC171_R_tho_P329fs    | DCEDLLVEFLEVDDNEDE-----RLMPSHSKEYRVKVLNPHT*-----        | 337 |
| TAC270_L_cerv_P329fs   | DCEDLLVEFLEVDDNEDE-----RLMPSHSKEYRVKVLNPHT*-----        | 337 |
| TAC297_L_tho_P329fs    | DCEDLLVEFLEVDDNEDE-----RLMPSHSKEYRVKVLNPHT*-----        | 337 |
| TAC300_L_tho_P329fs    | DCEDLLVEFLEVDDNEDE-----RLMPSHSKEYRVKVLNPHT*-----        | 337 |
| TAC299_L_tho_D343fs    | DCEDLLVEFLEVDDNEDE-----RLMPSHSKEYPGQGVKPTHLDPDSELWSWKL* | 349 |
| SSM3_K334fs            | DCEDLLVEFLEVDDNEDE-----RLMPSHSKEYPGQGVNPHT*-----        | 337 |
| TAC273_L_tho_K334fs    | DCEDLLVEFLEVDDNEDE-----RLMPSHSKEYPGQGVNPHT*-----        | 337 |
| TAC300_R_ing_K334fs    | DCEDLLVEFLEVDDNEDE-----RLMPSHSKEYPGQGVNPHT*-----        | 337 |
| TAC246_R_ing_Y328*     | DCEDLLVEFLEVDDNEDE-----RLMPSHSKE*-----                  | 327 |
| TAC271_R_tho_Y328*     | DCEDLLVEFLEVDDNEDE-----RLMPSHSKE*-----                  | 327 |
| TAC301_L_tho_R319fs    | DCEDLLVEFLEVDDNEDE-----PKSIRVKV-----LNPH*-----          | 331 |
| TAC272_L_tho_E318fs    | DCEDLLVEFLEVDDNEDQ-----RVSGSRC*-----                    | 325 |
| TAC312_L_tho_L320fs    | DCEDLLVEFLEVDDNEDE-----RVSGSRC*-----                    | 325 |
| TAC319_L_ing_L320fs    | DCEDLLVEFLEVDDNEDE-----RVSGSRC*-----                    | 325 |
| TAC270_L_ing_E318fs    | DCEDLLVEFLEVDDNEDA---ANAIPFQRVSGSRC*-----               | 332 |
| TAC298_L_tho_E318fs    | DCEDLLVEFLEVDDNEDA---ANAIPFQRVSGSRC*-----               | 332 |
| TAC268_L_tho_R319fs    | DCEDLLVEFLEVDDNEDE---QCHPIPKSIR-----VKVLNPHT*-----      | 336 |
| TAC186_L_cerv_E318fs   | DCEDLLVEFLEVDDNEDGWLAAANAIPFQRVSGSRC*-----              | 335 |
| TAC273_R_ing_E318fs    | DCEDLLVEFLEVDDNEDG*-----                                | 318 |
| SSM2_E319fs            | DCEDLLVEFLEVDDNEDELRTSG*-----                           | 323 |
| SSM1_E318fs            | DCEDLLVEFLEVDDNEDSG*-----                               | 319 |
| TAC183_R_tho_E318fs    | DCEDLLVEFLEVDDNEDSG*-----                               | 319 |
| TAC247_L_cerv_E318fs   | DCEDLLVEFLEVDDNEDSG*-----                               | 319 |
| TAC269_L_cerv_E318fs   | DCEDLLVEFLEVDDNEDSG*-----                               | 319 |
| TAC319_R_ing_E318fs    | DCEDLLVEFLEVDDNEDSG*-----                               | 319 |
| TAC323_L_tho_E318fs    | DCEDLLVEFLEVDDNEDSG*-----                               | 319 |
| TAC274_R_ing_E318*     | DCEDLLVEFLEVDDNED*-----                                 | 317 |
| TAC299_R_tho_E318*     | DCEDLLVEFLEVDDNED*-----                                 | 317 |
| TAC311_L_ing_E318*     | DCEDLLVEFLEVDDNED*-----                                 | 317 |
|                        | *****                                                   |     |





**Figure S6. Definition of full-length vs. truncated-isoform ratio using RNA-seq junction data.**  
 Related to **Figure 4, Results and Experimental Procedures.**

Junction reads per million junction reads mapped (JPM) expression of the Full-Length (FL) and Truncated (T) isoforms of *PRLR* were calculated from raw counts and the ratio was defined as  $\log_2((FL + .01)/(T + .01))$  (Boutin et al., 1989; Hu et al., 2001; Kline et al., 1999; Kline et al., 2002; Trott et al., 2003). All isoforms could not be uniquely extracted and were simplified as defined below. Junction data was not available for junction 10B. JPM values for 3A and 10A were subtracted from the full-length JPM value to remove any contribution of the truncated isoforms to this calculation. The region of interest (ROI) corresponds to the “long” exon of *PRLR* and the upstream-most exon.

Junction per Million (JPM) = (Raw Count of Junction)/(Sum of all hg19 Junctions) \* 1,000,000

Full-length (FL) = (LF, IF)

Truncated (T) = (S1a, S1b, Δ4 S1b, ΔS4-Δ7/11, Δ7/11, ΔS1)

Region of Interest (ROI) = (chr5:35065191-35066204;hg19 and chr5:35068318-35068387;hg19)

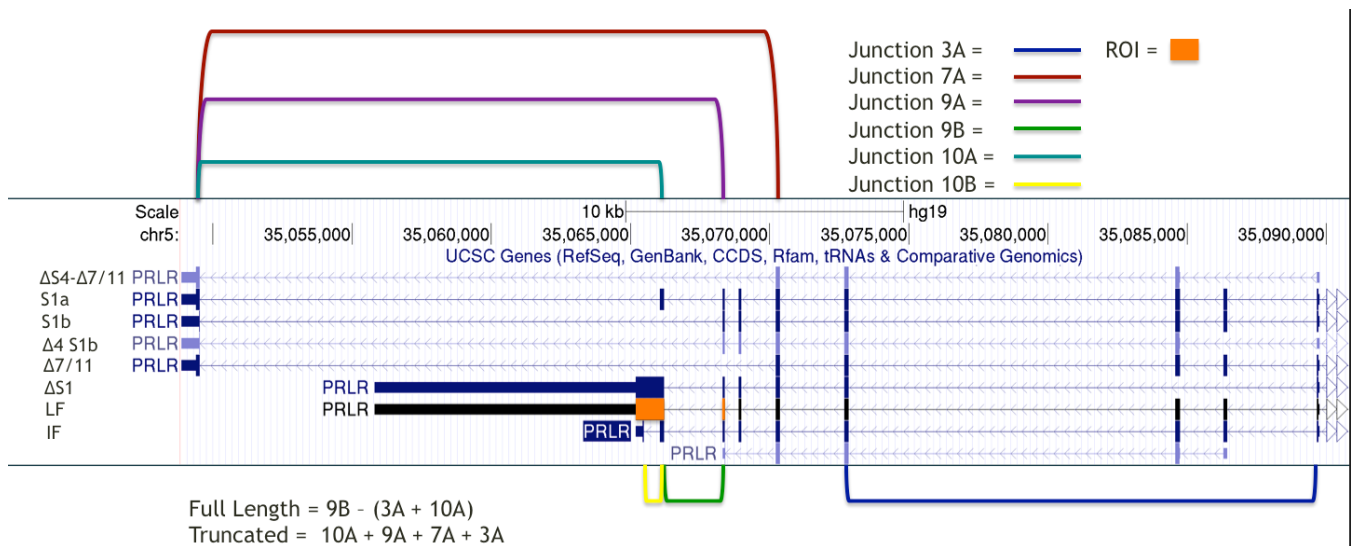

## Supplemental Tables

**Table S1. SNV/Indel MAF file.** Related to **Table 1, Results,** and **Experimental Procedures.**

**Table S2. Recurrently mutated genes.** Related to **Table 1, Results,** and **Experimental Procedures.**

**Table S3. Significantly mutated genes.** Related to **Table 1, Results,** and **Experimental Procedures.**

| Gene               | Tot Muts | Covd Bps | Muts pMbp | P-value FCPT | P-value LRT | P-value CT | FDR FCPT | FDR LRT  | FDR CT   |
|--------------------|----------|----------|-----------|--------------|-------------|------------|----------|----------|----------|
| Prlr               | 17       | 103884   | 163.64    | 0            | 0           | 0          | 0        | 0        | 0        |
| Olfrl1062          | 5        | 20944    | 238.73    | 5.52E-06     | 7.77E-12    | 2.21E-10   | 0.08566  | 1.21E-07 | 3.44E-06 |
| Tgoln1             | 3        | 27253    | 110.08    | 0.00015      | 5.25E-10    | 3.48E-08   | 1        | 5.43E-06 | 0.000360 |
| Taar7e             | 3        | 23768    | 126.22    | 0.00043      | 2.42E-09    | 8.76E-08   | 1        | 1.88E-05 | 0.000680 |
| Esrrg              | 3        | 43384    | 69.15     | 0.00061      | 3.85E-09    | 1.93E-07   | 1        | 2.39E-05 | 0.001037 |
| Gnl1               | 3        | 39899    | 75.19     | 0.00069      | 4.65E-09    | 2.00E-07   | 1        | 2.41E-05 | 0.001037 |
| 4930503E14Rik      | 3        | 12100    | 247.93    | 0.00186      | 2.17E-08    | 3.98E-07   | 1        | 8.41E-05 | 0.001767 |
| Galnt5             | 3        | 62302    | 48.15     | 0.00185      | 1.97E-08    | 9.19E-07   | 1        | 8.41E-05 | 0.003569 |
| Anp32b             | 2        | 26616    | 75.14     | 0.02078      | 8.60E-07    | 1.25E-05   | 1        | 0.002967 | 0.035214 |
| 4932431P20Rik      | 4        | 317999   | 12.58     | 0.00574      | 1.43E-06    | 1.58E-05   | 1        | 0.004442 | 0.040876 |
| ENSMUSG00000089277 | 2        | 2331     | 858       | 0.00797      | 2.41E-06    | 2.10E-06   | 1        | 0.006755 | 0.007236 |
| 4930448N21Rik      | 2        | 9203     | 217.32    | 0.03802      | 2.61E-06    | 3.06E-05   | 1        | 0.006755 | 0.067775 |
| Trp53              | 3        | 29673    | 101.1     | 0.03601      | 2.83E-06    | 2.52E-05   | 1        | 0.006759 | 0.060291 |
| Slc39a12           | 3        | 73062    | 41.06     | 0.04052      | 3.28E-06    | 6.45E-05   | 1        | 0.007268 | 0.125116 |
| Krt15              | 3        | 33307    | 90.07     | 0.01749      | 1.13E-05    | 1.08E-05   | 1        | 0.023384 | 0.033656 |
| Brca1              | 2        | 121575   | 16.45     | 0.10509      | 1.57E-05    | 0.00038    | 1        | 0.030387 | 0.491181 |

**Table S4. Sanger validation results for original WGS Prlr mutation calls.** Related to **Table 2,** and **Results.**

| Sample Name      | Sanger Call                                    | Start    | Stop     | Variant            | Status    | Supporting read count |
|------------------|------------------------------------------------|----------|----------|--------------------|-----------|-----------------------|
| B3R15 L. tho.    | het del 1 G chr15:10258182                     | 10258182 | 10258182 | G/0                | Validated | 4                     |
| B3R1R2L1 R. tho. | het del 1 C chr15:10258180                     | 10258180 | 10258180 | C/0                | Validated | 4                     |
| OVX3L2 R. tho.   | het del 1 G chr15:10258151                     | 10258151 | 10258151 | G/0                | Validated | 3                     |
| OVX6R2 L. cerv.  | het del 1 G chr15:10258151                     | 10258151 | 10258151 | G/0                | Validated | 2                     |
| SSM1             | hom del 1 G chr15:10258147                     | 10258147 | 10258147 | G/0                | Validated | 3                     |
| SSM2             | het ins 11 TGAGGACGAGC chr15:10258139-10258140 | 10258139 | 10258140 | 0/TGAGGACGAGC      | Validated | 1                     |
| SSM3             | het del 1 A chr15:10258195                     | 10258195 | 10258195 | A/0                | Validated | 3                     |
| TAC171 R. tho.   | het del 1 C chr15:10258180                     | 10258180 | 10258180 | C/0                | Validated | 3                     |
| TAC183 R. tho.   | hom del 1 G chr15:10258147                     | 10258147 | 10258147 | G/0                | Validated | 1                     |
| TAC186 L. cerv.  | het ins 7 GATGGCT chr15:10258147-10258148      | 10258147 | 10258148 | 0/GATGGCT          | Validated | 2                     |
| TAC246 R. ing.   | wildtype                                       | N/A      | N/A      | wildtype           | Validated | 4                     |
| TAC247 L. cerv.  | ambiguous indel at                             | 10258154 | 10258169 | TAATGCCATCCCATTC/0 | Ambiguous | 1                     |

|                 |                                                                  |          |          |                               |           |   |  |  |  |  |
|-----------------|------------------------------------------------------------------|----------|----------|-------------------------------|-----------|---|--|--|--|--|
|                 | chr15:10258154                                                   |          |          |                               |           |   |  |  |  |  |
| TAC266 L. tho.  | het del 1 G chr15:10258182                                       | 10258182 | 10258182 | G/0                           | Validated | 1 |  |  |  |  |
| TAC268 L. tho.  | het del 4 GGCT chr15:10258151-10258154                           | 10258151 | 10258154 | GGCT/0                        | Validated | 2 |  |  |  |  |
| TAC269 L. cerv. | het del 1 G chr15:10258147                                       | 10258147 | 10258147 | G/0                           | Validated | 3 |  |  |  |  |
| TAC270 L. cerv. | het del 1 C chr15:10258180                                       | 10258180 | 10258180 | C/0                           | Validated | 3 |  |  |  |  |
| TAC270 L. ing.  | het del 2 GA chr15:10258147-10258148                             | 10258147 | 10258148 | GA/0                          | Validated | 3 |  |  |  |  |
| TAC271 R. tho.  | ambiguous snp T/A at 10258179                                    | 10258179 | 10258179 | T/A                           | Ambiguous | 2 |  |  |  |  |
| TAC272 L. tho.  | het del 23<br>CGAGCGGCTAATGCCATCCCATT<br>chr15:10258146-10258168 | 10258146 | 10258168 | CGAGCGGCTAATGCCAT<br>CCCATT/0 | Validated | 1 |  |  |  |  |
| TAC273 L. tho.  | het del 1 A chr15:10258195                                       | 10258195 | 10258195 | A/0                           | Validated | 3 |  |  |  |  |
| TAC273 R. ing.  | het del 4 CGAG<br>chr15:10258146-10258149                        | 10258146 | 10258149 | CGAG/0                        | Validated | 1 |  |  |  |  |
| TAC274 R. ing.  | het snp GT chr15:10258147                                        | 10258147 | 10258147 | G/T                           | Validated | 2 |  |  |  |  |

**Table S5. Details of all Prlr mutations. Related to Figure 2, Table 2 and Results.**

| Chr | Start    | Stop     | Reference            | Variant         | Type | Sample name       | Strand | trv type        | c position | amino acid change |
|-----|----------|----------|----------------------|-----------------|------|-------------------|--------|-----------------|------------|-------------------|
| 15  | 10258182 | 10258182 | G                    | 0               | DEL  | B3R15 L. tho.     | 1      | frame_shift_del | c.987      | p.G330fs          |
| 15  | 10258180 | 10258180 | C                    | 0               | DEL  | B3R1R2L 1 R. tho. | 1      | frame_shift_del | c.985      | p.P329fs          |
| 15  | 10258151 | 10258151 | G                    | 0               | DEL  | OVX3L2 R. tho.    | 1      | frame_shift_del | c.956      | p.L320fs          |
| 15  | 10258151 | 10258151 | G                    | 0               | DEL  | OVX6R2 L. cerv.   | 1      | frame_shift_del | c.956      | p.L320fs          |
| 15  | 10258147 | 10258147 | G                    | 0               | DEL  | SSM1              | 1      | frame_shift_del | c.952      | p.E318fs          |
| 15  | 10258139 | 10258140 | 0                    | TGAGGAC<br>GAGC | INS  | SSM2              | 1      | frame_shift_ins | c.944_945  | p.E319fs          |
| 15  | 10258195 | 10258195 | A                    | 0               | DEL  | SSM3              | 1      | frame_shift_del | c.1000     | p.K334fs          |
| 15  | 10258180 | 10258180 | C                    | 0               | DEL  | TAC171 R. tho.    | 1      | frame_shift_del | c.985      | p.P329fs          |
| 15  | 10258147 | 10258147 | G                    | 0               | DEL  | TAC183 R. tho.    | 1      | frame_shift_del | c.952      | p.E318fs          |
| 15  | 10258147 | 10258148 | 0                    | GATGGCT         | INS  | TAC186 L. cerv.   | 1      | frame_shift_ins | c.952_953  | p.E318fs          |
| 15  | 10258178 | 10258186 | ATCCGGGTC            | 0               | DEL  | TAC246 R. ing.    | 1      | in_frame_del    | c.983_991  | p.Y328*           |
| 15  | 10258147 | 10258147 | G                    | 0               | DEL  | TAC247 L. cerv.   | 1      | frame_shift_del | c.952      | p.E318fs          |
| 15  | 10258153 | 10258168 | CTAATGCCATCCC<br>ATT | 0               | DEL  | TAC247 L. cerv.   | 1      | frame_shift_del | c.958_973  | p.L320fs          |
| 15  | 10258182 | 10258182 | G                    | 0               | DEL  | TAC266 L. tho.    | 1      | frame_shift_del | c.987      | p.G330fs          |
| 15  | 10258151 | 10258154 | GGCT                 | 0               | DEL  | TAC268 L. tho.    | 1      | frame_shift_del | c.956_959  | p.R319fs          |
| 15  | 10258147 | 10258147 | G                    | 0               | DEL  | TAC269 L. cerv.   | 1      | frame_shift_del | c.952      | p.E318fs          |
| 15  | 10258180 | 10258180 | C                    | 0               | DEL  | TAC270 L. cerv.   | 1      | frame_shift_del | c.985      | p.P329fs          |
| 15  | 10258147 | 10258148 | GA                   | 0               | DEL  | TAC270 L. ing.    | 1      | frame_shift_del | c.952_953  | p.E318fs          |

|    |          |          |                                               |   |     |                          |   |                     |             |          |
|----|----------|----------|-----------------------------------------------|---|-----|--------------------------|---|---------------------|-------------|----------|
| 15 | 10258179 | 10258179 | T                                             | A | SNP | TAC271<br>R. tho.        | 1 | nonsense            | c.984       | p.Y328*  |
| 15 | 10258146 | 10258168 | CGAGCGGCTAAT<br>GCCATCCCATT                   | 0 | DEL | TAC272<br>L. tho.        | 1 | frame_shift<br>_del | c.951_973   | p.E318fs |
| 15 | 10258195 | 10258195 | A                                             | 0 | DEL | TAC273<br>L. tho.        | 1 | frame_shift<br>_del | c.1000      | p.K334fs |
| 15 | 10258146 | 10258149 | CGAG                                          | 0 | DEL | TAC273<br>R. ing.        | 1 | frame_shift<br>_del | c.951_954   | p.E318fs |
| 15 | 10258147 | 10258147 | G                                             | T | SNP | TAC274<br>R. ing.        | 1 | nonsense            | c.952       | p.E318*  |
| 15 | 10258184 | 10258184 | G                                             | 0 | DEL | OVX13R<br>1R2 L.<br>ing. | 1 | frame_shift<br>_del | c.989       | p.G330fs |
| 15 | 10258181 | 10258181 | C                                             | 0 | DEL | TAC297<br>L. tho.        | 1 | frame_shift<br>_del | c.986       | p.P329fs |
| 15 | 10258148 | 10258149 | AG                                            | 0 | DEL | TAC298<br>L. tho.        | 1 | frame_shift<br>_del | c.953_954   | p.E318fs |
| 15 | 10258147 | 10258147 | G                                             | T | SNP | TAC299<br>R. tho.        | 1 | nonsense            | c.952       | p.E318*  |
| 15 | 10258181 | 10258181 | C                                             | 0 | DEL | TAC300<br>L. tho.        | 1 | frame_shift<br>_del | c.986       | p.P329fs |
| 15 | 10258194 | 10258194 | T                                             | 0 | DEL | TAC300<br>R. ing.        | 1 | frame_shift<br>_del | c.999       | p.K334fs |
| 15 | 10258151 | 10258169 | GGCTAATGCCATC<br>CCATTC                       | 0 | DEL | TAC301<br>L. tho.        | 1 | frame_shift<br>_del | c.956_974   | p.R319fs |
| 15 | 10258142 | 10258149 | AGGACGAG                                      | 0 | DEL | TAC302<br>R. cerv.       | 1 | frame_shift<br>_del | c.947_954   | p.E316fs |
| 15 | 10258184 | 10258184 | G                                             | 0 | DEL | TAC311<br>L. cerv.       | 1 | frame_shift<br>_del | c.989       | p.G330fs |
| 15 | 10258147 | 10258147 | G                                             | T | SNP | TAC311<br>L. ing.        | 1 | nonsense            | c.952       | p.E318*  |
| 15 | 10258222 | 10258223 | 0                                             | A | INS | TAC299<br>L. tho.        | 1 | frame_shift<br>_ins | c.1027_1028 | p.D343fs |
| 15 | 10258151 | 10258173 | GGCTAATGCCATC<br>CCATTCCAAA                   | - | DEL | TAC312<br>L. tho.        | 1 | frame_shift<br>_del | c.956_978   | p.L320fs |
| 15 | 10258177 | 10258177 | T                                             | - | DEL | TAC314<br>L. tho.        | 1 | frame_shift<br>_del | c.982       | p.Y328fs |
| 15 | 10258151 | 10258173 | GGCTAATGCCATC<br>CCATTCCAAA                   | - | DEL | TAC319<br>L. ing.        | 1 | frame_shift<br>_del | c.956_978   | p.L320fs |
| 15 | 10258147 | 10258147 | G                                             | - | DEL | TAC319<br>R. ing.        | 1 | frame_shift<br>_del | c.952       | p.E318fs |
| 15 | 10258154 | 10258191 | TAATGCCATCCCA<br>TTCCAAAGAGTAT<br>CCGGTCAAGGT | - | DEL | TAC322<br>L. tho.        | 1 | frame_shift<br>_del | c.959_996   | p.L320fs |
| 15 | 10258147 | 10258147 | G                                             | - | DEL | TAC323<br>L. tho.        | 1 | frame_shift<br>_del | c.952       | p.E318fs |

Based on mouse Ensembl version 67, NCBI build 37.  
Prlr gene (ENSMUSG00000005268) and transcript (ENSMUST00000124470).

**Table S6. Details of all known isoforms of PRLR according to Ensembl, UCSC and UniProt.**  
Related to **Figure 4** and **Results**.

**Table S7. Master sample sheet.** Related to **Figure 1** and **Experimental Procedures**.

**Table S8. Summary of WGS data quality.** Related to **Figure 1** and **Experimental Procedures**.

| Sample Name | Gbp Data Produced | Haploid Coverage | Total Reads | Duplicates | Mapped    | Read Mapping rate |
|-------------|-------------------|------------------|-------------|------------|-----------|-------------------|
| B3R15 tail  | 98.4637024        | 19.8             | 984637024   | 206399181  | 834461996 | 84.74818392       |

|                  |             |        |            |           |            |             |
|------------------|-------------|--------|------------|-----------|------------|-------------|
| B3R15 L. tho.    | 129.468051  | 38.509 | 1294680510 | 117159572 | 1243606515 | 96.05508891 |
| B3R1R2L1 tail    | 93.52087    | 17.278 | 935208700  | 217548506 | 779246918  | 83.32331789 |
| B3R1R2L1 R. tho. | 108.9314228 | 31.526 | 1089314228 | 80440642  | 1018346688 | 93.48511768 |
| OVX3L2 tail      | 114.6703656 | 34.562 | 1146703656 | 100282677 | 1104080914 | 96.28302031 |
| OVX3L2 R. tho.   | 118.6235328 | 34.335 | 1186235328 | 116885991 | 1110055169 | 93.57798936 |
| OVX6R2 tail      | 116.7272886 | 29.229 | 1167272886 | 139010798 | 994458447  | 85.19502671 |
| OVX6R2 L. cerv.  | 115.409363  | 32.942 | 1154093630 | 125139455 | 1077020815 | 93.32178837 |
| SSM1             | 148.8810846 | 41.595 | 1488810846 | 205420313 | 1427896794 | 95.90854324 |
| SSM2             | 134.3889544 | 38.475 | 1343889544 | 176826882 | 1293006018 | 96.21371219 |
| SSM3             | 133.2712376 | 38.537 | 1332712376 | 159271169 | 1282370435 | 96.22259522 |
| TAC171 R. tho.   | 124.5400856 | 37.301 | 1245400856 | 75625321  | 1173607476 | 94.23531952 |
| TAC183 R. tho.   | 118.733256  | 34.326 | 1187332560 | 78295285  | 1106184358 | 93.16550352 |
| TAC186 L. cerv.  | 122.5908556 | 36.411 | 1225908556 | 101466579 | 1156960781 | 94.37578157 |
| TAC236 MG        | 67.177392   | 18.74  | 671773920  | 118418783 | 649717662  | 96.71671416 |
| TAC237 MG        | 75.1392458  | 21.95  | 751392458  | 85646916  | 723535395  | 96.29260812 |
| TAC238 MG        | 71.892757   | 20.2   | 718927570  | 123647626 | 697035285  | 96.95486918 |
| TAC239 MG        | 55.7686952  | 16.385 | 557686952  | 79434218  | 541406240  | 97.08067188 |
| TAC240 MG        | 60.7934208  | 17.749 | 607934208  | 89555920  | 590537505  | 97.13839051 |
| TAC241 MG        | 85.466625   | 23.923 | 854666250  | 132107228 | 820859373  | 96.04443524 |
| TAC242 MG        | 81.153794   | 21.825 | 811537940  | 147192188 | 772615038  | 95.20380994 |
| TAC243 MG        | 70.8781072  | 19.51  | 708781072  | 129199592 | 687502699  | 96.99789204 |
| TAC244 MG        | 67.776858   | 19.095 | 677768580  | 95026180  | 645439091  | 95.23001066 |
| TAC245 MG        | 72.7946258  | 20.396 | 727946258  | 135899907 | 709284998  | 97.43645087 |
| TAC246 R. ing.   | 125.3001016 | 35.808 | 1253001016 | 135434601 | 1191634543 | 95.10244028 |
| TAC247 L. cerv.  | 127.9514356 | 37.301 | 1279514356 | 123751413 | 1216319815 | 95.0610526  |
| TAC263 MG        | 138.047999  | 32.443 | 1380479990 | 239815859 | 1215651175 | 88.06003592 |
| TAC263 tail      | 124.9547678 | 27.638 | 1249547678 | 217373427 | 1084998042 | 86.83126391 |
| TAC264 MG        | 159.1427846 | 35.313 | 1591427846 | 299690249 | 1336302140 | 83.96875443 |
| TAC264 tail      | 118.6124524 | 27.618 | 1186124524 | 251930780 | 1088694054 | 91.78581439 |
| TAC265 MG        | 159.616026  | 37.612 | 1596160260 | 280650416 | 1404563681 | 87.99640714 |
| TAC265 tail      | 133.2096788 | 24.884 | 1332096788 | 269070385 | 1035520810 | 77.73615396 |
| TAC266 MG        | 224.6979652 | 48.6   | 2246979652 | 689278121 | 2109590342 | 93.88560062 |
| TAC266 tail      | 187.7547706 | 42.292 | 1877547706 | 368155435 | 1653287121 | 88.05566515 |
| TAC266 L. tho.   | 229.9043578 | 66.479 | 2299043578 | 224531078 | 2150781067 | 93.5511222  |
| TAC268 MG        | 120.1834742 | 37.837 | 1201834742 | 80105347  | 1172453545 | 97.55530474 |
| TAC268 tail      | 118.9858064 | 37.689 | 1189858064 | 65578870  | 1153901043 | 96.97804116 |
| TAC268 L. tho.   | 112.4953512 | 33.684 | 1124953512 | 112005364 | 1086691684 | 96.59880808 |
| TAC269 tail      | 104.9254376 | 29.111 | 1049254376 | 176108396 | 1011852849 | 96.43541854 |
| TAC269 L. cerv.  | 101.7742068 | 30.929 | 1017742068 | 102614572 | 987654983  | 97.04374164 |
| TAC270 L. cerv.  | 117.0297188 | 36.866 | 1170297188 | 68941240  | 1133862613 | 96.88672455 |
| TAC270 L. ing.   | 120.442782  | 36.78  | 1204427820 | 93581306  | 1160065553 | 96.31673511 |
| TAC270 tail      | 117.3161028 | 35.316 | 1173161028 | 107097272 | 1130809356 | 96.38995236 |
| TAC271 tail      | 103.2880992 | 30.202 | 1032880992 | 94912847  | 973406841  | 94.2419164  |
| TAC271 R. tho.   | 116.0329936 | 32.795 | 1160329936 | 122977932 | 1081360230 | 93.19420248 |

|                |             |        |            |           |            |             |
|----------------|-------------|--------|------------|-----------|------------|-------------|
| TAC272 tail    | 112.864483  | 33.928 | 1128644830 | 69371213  | 1056131141 | 93.57515428 |
| TAC272 L. tho. | 111.2546792 | 32.022 | 1112546792 | 115265413 | 1046458947 | 94.0597694  |
| TAC273 L. tho. | 122.280144  | 37.669 | 1222801440 | 73249513  | 1156665784 | 94.59146401 |
| TAC273 R. ing. | 123.6560642 | 37.616 | 1236560642 | 82326960  | 1161400870 | 93.9218693  |
| TAC273 tail    | 89.7288922  | 22.954 | 897288922  | 150900438 | 819137924  | 91.29031953 |
| TAC274 R. ing. | 112.644696  | 33.934 | 1126446960 | 89913333  | 1071956470 | 95.16262266 |
| TAC274 tail    | 92.3263574  | 26.762 | 923263574  | 106680274 | 878420409  | 95.14297257 |

**Table S9. Summary of CNV calls.** Related to **Experimental Procedures**.

**Table S10. Primers for amplification and sequencing of Prlr truncation target region.** Related to **Figure 2** and **Table 2**, and **Experimental Procedures**.

| Primer details |                                                         | Genomic location and sizes (mm9; C57BL/6J) |            |            |              |          |
|----------------|---------------------------------------------------------|--------------------------------------------|------------|------------|--------------|----------|
| Name           | Sequence (5' to 3'; M13 sequencing tails in lower case) | Chr                                        | Start      | End        | Product size | Amp size |
| M_15_02auf_1   | tgtaaaacgacggccagtGAAGAACTGCTGAGTGCCTTGG                | 15                                         | 10,258,048 | 10,258,069 | 308          | 228      |
| M_15_02auf_2   | caggaacagctatgaccGTGATCTCAGGGATGTGGAAGG                 | 15                                         | 10,258,298 | 10,258,319 |              |          |
| M_15_02aug_1   | tgtaaaacgacggccagtGGACTTGCTGGTGGAGTTCTT                 | 15                                         | 10,258,104 | 10,258,124 | 155          | 76       |
| M_15_02aug_2   | caggaacagctatgaccCACTGTCAGGATCTAGGTGTGT                 | 15                                         | 10,258,201 | 10,258,222 |              |          |

Note: product sizes without M13 tails are 272 and 119 respectively.

## Supplemental Data Files

**Appendix 1. IGV screenshots of Prlr mutations from the 22 discovery tumors.** Related to **Figure 2**, **Table 2**, and **Results**.

**Appendix 2. Sanger traces for Prlr validation of WGS findings.** Related to **Figure 2**, **Table 2**, and **Results**.

**Appendix 3. Sanger traces for Prlr extension to additional tumor and non-tumor samples.** Related to **Figure 2**, **Table 2**, and **Results**.

**Appendix 4. Screenshots from IGV for Prlr validation of two WGS samples from FFPE and extension to DCIS samples by MiSeq.** Related to **Figure 2**, **Table 2**, and **Results**.
